# Supplementary material for: How do doctors experience the interactions among professional fulfilment, organisational factors and quality of patient care? A qualitative study in a Norwegian hospital
Source: PubMed Central journal article supplement — BMJ Open. 2019 May 24;9(5):e026971. doi: 10.1136/bmjopen-2018-026971 (PMC6537988; doi:10.1136/bmjopen-2018-026971), 2019-05-24
Supplement: bmjopen-2018-026971.draft_revisions.pdf [file bmjopen-2018-026971.draft_revisions.pdf]

# BMJ Open

BMJ Open is committed to open peer review. As part of this commitment we make the peer review history of every article we publish publicly available.

When an article is published we post the peer reviewers' comments and the authors' responses online. We also post the versions of the paper that were used during peer review. These are the versions that the peer review comments apply to.

The versions of the paper that follow are the versions that were submitted during the peer review process. They are not the versions of record or the final published versions. They should not be cited or distributed as the published version of this manuscript.

BMJ Open is an open access journal and the full, final, typeset and author-corrected version of record of the manuscript is available on our site with no access controls, subscription charges or pay-per-view fees (<http://bmjopen.bmj.com>).

If you have any questions on BMJ Open's open peer review process please email [info.bmjopen@bmj.com](mailto:info.bmjopen@bmj.com)

# BMJ Open

## How do hospital physicians experience the interactions between professional fulfillment, organization and quality of care? A qualitative study

|                               |                                                                                                                                                                                                                                                                                                                                |
|-------------------------------|--------------------------------------------------------------------------------------------------------------------------------------------------------------------------------------------------------------------------------------------------------------------------------------------------------------------------------|
| Journal:                      | <i>BMJ Open</i>                                                                                                                                                                                                                                                                                                                |
| Manuscript ID                 | bmjopen-2018-026971                                                                                                                                                                                                                                                                                                            |
| Article Type:                 | Research                                                                                                                                                                                                                                                                                                                       |
| Date Submitted by the Author: | 04-Oct-2018                                                                                                                                                                                                                                                                                                                    |
| Complete List of Authors:     | Bååthe, Fredrik; LEFO - Institute for studies of the medical profession; Institutet for stressmedicin, Rosta, Judith; LEFO - Institute for studies of the medical profession<br>Bringedal, Berit ; LEFO - Institute for studies of the medical profession<br>Rø, Karin; LEFO - Institute for studies of the medical profession |
| Keywords:                     | HEALTH SERVICES ADMINISTRATION & MANAGEMENT, EDUCATION & TRAINING (see Medical Education & Training), ETHICS (see Medical Ethics), PREVENTIVE MEDICINE, QUALITATIVE RESEARCH                                                                                                                                                   |
|                               |                                                                                                                                                                                                                                                                                                                                |

SCHOLARONE™  
Manuscripts

1  
2  
3 **How do hospital physicians experience the interactions between professional fulfillment,**  
4 **organization and quality of care? A qualitative study**  
5  
6  
7

---

8 Authors: Fredrik Bååthe, Judith Rosta, Berit Bringedal, Karin Isaksson Rø  
9

10 Corresponding author: Fredrik Bååthe, Beckasinvägen 2, 42933 Kullavik, Sweden,  
11 fredrik.baathe@vgregion.se, +46736601710  
12

13  
14 Fredrik Bååthe,  
15 LEFO -Institute for Studies of the Medical Profession, LEFO, Oslo, Norway;  
16 Sahlgrenska Academy at Gothenburg University, Sweden;  
17 Sahlgrenska University Hospital, Gothenburg, Sweden;  
18 Institute of Stressmedicin, Region Västra Götaland, Sweden  
19

20 Judith Rosta  
21 LEFO - Institute for Studies of the Medical Profession, Oslo, Norway  
22

23 Berit Bringedal  
24 LEFO - Institute for Studies of the Medical Profession, Oslo, Norway  
25

26 Karin Isaksson Rø,  
27 LEFO - Institute for Studies of the Medical Profession, Oslo, Norway;  
28 Dept. of Behavioural Sciences in Medicine, Institute of Basic Medical Sciences, Medical Faculty,  
29 University of Oslo  
30

31 Keywords: Physician, professional fulfillment, satisfaction, patient-quality, organization  
32

33  
34 7543 words  
35  
36  
37  
38  
39  
40  
41  
42  
43  
44  
45  
46  
47  
48  
49  
50  
51  
52  
53  
54  
55  
56  
57  
58  
59  
60

## Abstract

**Objectives:** Physicians increasingly experience high levels of burnout and loss of engagement. To address this there is a need to better understand how physicians' professional fulfillment is related to organizational factors and quality of patient care. This study explores how physicians experience the interaction among professional fulfillment/satisfaction, organizational factors and quality of patient care.

**Design:** Interactive research strategy with semi-structured individual physician interviews. Interviews were transcribed verbatim and analyzed by a transdisciplinary research group. Findings were presented back to the group of physicians. This feedback explicitly addressed the local workplace and provided a shared understanding. This in turn enabled a joint focus on meaningful change.

**Setting:** Mid-sized emergency hospital in Norway

**Participants:** A purposeful heterogeneity sampling was used, with gender and seniority as selection criteria. Seven physicians were interviewed. Three senior physicians (two female, one male) and four in training (three male, one female).

**Results:** This study finds that physicians' individual plasticity, meeting the professional ideal to put patient needs before own needs, is overstretched. A workplace emphasis on production numbers and budget concerns led to an experience of estrangement among physicians. No longer feeling aligned with work-place values, in addition to limited management recognition for good-quality patient work, led the physicians to become disoriented in relation to their professional identity. Physicians reported a shift from serving as trustworthy, autonomous resources to become production workers; they also expressed frustration with limited opportunities to be involved in local development work.

**Conclusion:** Physicians traditional way of handling time and task collisions by stretching themselves is no longer functional without compromising both professional fulfillment/satisfaction and quality of patient care. Physicians' engagement in organizational development work is now foundational to

1  
2  
3  
4  
5  
6  
7  
8  
9  
10  
11  
12  
13  
14  
15  
16  
17  
18  
19  
20  
21  
22  
23  
24  
25  
26  
27  
28  
29  
30  
31  
32  
33  
34  
35  
36  
37  
38  
39  
40  
41  
42  
43  
44  
45  
46  
47  
48  
49  
50  
51  
52  
53  
54  
55  
56  
57  
58  
59  
60

secure both quality of patient care and physicians' professional fulfillment/satisfaction. The used interactive research model provides a vehicle to support such development.

For peer review only

### Strength and limitations of this study

The chosen method, interactive research is a way to increase research relevance and contribute to actual improvements: an indication of the relevance is that although the interviews were planned for 60 minutes, many physicians willingly spent extra time (the average interview was 74 min)

This study has a potential limitation in that the empirical material was based on interviews with seven physicians, however, given our priority to capture in-depth, nuanced aspects, individual interviews were given priority over the higher number resulting from group interviews.

It is a strength having an interdisciplinary research group conduct the analytical work allowing each interview to provide a rich, nuanced source of the empirical.

Another strength is that the qualitative research process facilitated close attention to the individual physician experience, while simultaneously analytically striving to find an empirically grounded collective physicians' voice.

This study focused one clinical setting but based on previous research showing communality among physicians across different contexts in the western world we suggest many health care settings could benefit from the findings in this study.

## Introduction

High-quality health care depends not only on high-tech equipment, sufficient resources and reliable evidence, but on health professionals who are satisfied and engaged with their work. Researchers have recently argued for expanding the traditional health care improvement goals. In addition to enhancing patient treatment, securing the population's health and reducing the per capita cost of health care <sup>1</sup>, they argue for promoting professional fulfillment/satisfaction <sup>2 3</sup>. Bodenheimer and Sinsky expressed this succinctly as, "care of the patient requires care of the provider" <sup>4</sup>.

A group of 32 experts in the study of burnout among health professionals gathered in the fall of 2016 to find ways to alleviate burnout. The group suggested that, to better care for providers, a better understanding of the links among professional fulfillment/satisfaction, quality of care and organizational factors is needed. The group argued that the research community does not have sufficient understanding about the relationships among individual factors, organizational factors and quality of care, concluding with an urgent request for more studies in this field <sup>5</sup>. There seems to be a call for research to provide more practice-informed and actionable knowledge to facilitate research-based interventions in developing the local workplace<sup>6</sup>.

Several studies have explored these links as bidirectional relationships. The relationship between professional satisfaction and quality of care has been studied, both as reported by physicians themselves <sup>7-9</sup> and as studies measuring the associations between satisfaction and more objective measures of quality, such as regulation of blood sugar levels in diabetes patients or number of patient complaints <sup>10 11</sup>. Likewise, different organizational factors have been found to influence professional behavior <sup>12 13</sup>, motivation and

1  
2  
3 engagement<sup>14 15</sup> and management has been found to impact physician satisfaction<sup>16-18</sup>.  
4  
5 Health care reorganizations seem to contribute to physician stress and feelings of alienation  
6  
7<sup>19</sup>. While externally driven changes that happen *to* physicians increase stress, physicians'  
8  
9 active involvement *in* change contributes to professional fulfillment/satisfaction<sup>20-22</sup>.  
10  
11

12  
13 Thus, clarifying the relationships among organizational factors, professional  
14  
15 fulfillment/satisfaction and quality of care will support commensurate interventions toward  
16  
17 improving physicians' well-being and thus the quality of patient care<sup>23</sup>. Given physicians'  
18  
19 central positions in health care, their understanding of, and experiences with, these  
20  
21 interactions are important.  
22  
23

24  
25 In this study, the interactions among professional fulfillment/satisfaction,  
26  
27 organizational factors and quality of care are treated as a complex phenomenon, with a  
28  
29 distinction placed on the differences between simple, complicated and complex<sup>24</sup>. Simple  
30  
31 and complicated belong to a domain wherein detailed planning results in predictable  
32  
33 outcomes. In contrast, complex belongs to a domain wherein detailed planning does not  
34  
35 necessarily lead to predictable outcomes; paradoxical or surprising outcomes can also be  
36  
37 expected. Outcomes in the complex domain are considered to be predictably unpredictable  
38  
39<sup>25</sup>. Human interactions are part of the complex domain. As such, much of health care, in  
40  
41 which the essence is encounters between patients and caregivers, is complex by definition  
42  
43  
44  
45<sup>26 27</sup>.  
46  
47

#### 48 **Aim**

49  
50  
51 The study aim was to explore how physicians experience the interactions among  
52  
53 professional fulfillment/satisfaction, organizational factors and quality of patient care.  
54  
55  
56  
57  
58  
59  
60



## **Method**

### ***Design***

Complexity science has attracted researchers trying to make sense of the everyday intricacies of health care<sup>27-30</sup>. Complexity science introduced the science of uncertainty<sup>31</sup>, which specifically considers the dynamic and unpredictable nature of human interaction<sup>24</sup><sup>25</sup>. Thus, this field considers the complex relationships among areas, i.e. the impact, or lack thereof, of non-deterministic changes in one dimension on another area or areas. This conceptually differs from models based upon reductionist and mechanistic theories wherein planning, control, certainty and predictability are assigned centrality<sup>32 33</sup>.

### ***Patient and Public Involvement***

Clinically active physicians working at a hospital were the study subject. These physicians' important and active involvement in the study is discussed further below.

### ***Research Strategy and Physicians' Participation***

Previous studies have established that organizational changes in health care are difficult to achieve without physicians' active involvement; thus, we chose an interactive research strategy. Since the relationships we address in this study are complex, we need to understand them in the local context. Gaining the engagement of physicians has proven difficult in the past, so we elicited local physicians' perspectives on the relationships under evaluation. In other words, we used interviews to gather empirical material. By interviewing a group of physicians working in a specific clinical setting, and disseminating the results from their interviews back to them, we strove to increase their awareness of the need for change and these physicians willingness to engage in a local change process.

1  
2  
3 Our interactive method involved a back-and-forth strategy between the researchers  
4  
5 and practitioners. The intention was to collect, analyze and reanalyze data as a collaboration  
6  
7 between the researchers and the physicians. The strategy was to identify relevant research  
8  
9 questions, promote learning among both the practitioners and researchers and facilitate  
10  
11 local ownership of changes initiated by the collaborative process<sup>34 35</sup>. This method required  
12  
13 repeated interaction between researchers and physician participants. The researchers  
14  
15 summarized the early findings from the interviews and presented these to the group. This  
16  
17 feedback explicitly addressed aspects brought forward in the local workplace and provided a  
18  
19 new understanding, which potentially triggered a drive to initiate local changes. Following a  
20  
21 change initiative, the researchers can, at a later stage, explore the physicians' evolved  
22  
23 understanding based upon the newly developed situation. This paper specifically focuses on  
24  
25 the first cycle of this spiraling and continuous development process.  
26  
27  
28  
29

### 30 **Interviews**

31  
32 The interview is a way to gather rich information, in an effort to see the world as it is seen  
33  
34 by the interviewees and to strive to develop meaning from their personal experiences<sup>36</sup>. A  
35  
36 semi-structured interview guide with open-ended-questions was constructed to facilitate  
37  
38 consistency between interviews<sup>37</sup>. Simultaneously, open-ended questions allowed the  
39  
40 interviewer to delve further into topics that arose during the interview process. The  
41  
42 interview guide is in Appendix 1.  
43  
44  
45  
46  
47

48 Each physician received a written summary of the study before the interview,  
49  
50 including a conceptual model of the studied relationships/links (Figure 1).  
51  
52  
53  
54  
55  
56  
57  
58  
59  
60

1  
2  
3  
4  
5 [Figure 1 here]  
6

7 **Figure 1.** Conceptual model used in the interview situation  
8  
9

### 10 **Setting**

11  
12  
13 The physicians worked at a mid-sized emergency hospital in Norway providing medical,  
14 surgical and psychiatric care and with approximately 1,400 employees who serve a  
15 population of about 135,000 inhabitants. This is also a teaching hospital for physicians and  
16 nurses.  
17  
18  
19  
20  
21  
22

23 Following a presentation about the study to the hospital management, the  
24 researchers received approval to approach department managers. The study's aim and  
25 interactive study concept were presented to the group of physicians and department head.  
26  
27  
28 Following an internal discussion, the surgical department agreed to participate. The  
29 department expressed appreciation of the cooperative aspects of the study and the explicit  
30 intent to listen to physicians' voices about their local situation. This surgical department  
31 provides specialist care in general surgery as well as orthopedic surgery.  
32  
33  
34  
35  
36  
37  
38  
39

### 40 **Participants**

41  
42 To ensure a diverse set of physicians' voices, purposeful heterogeneity sampling was used  
43  
44 <sup>37</sup>, with gender and seniority as selection criteria. Seven physicians and their department  
45 head were interviewed. Three of the interviewees were senior physicians (two female, one  
46 male) and four were in training (three male, one female); the department head was a  
47 senior, male physician.  
48  
49  
50  
51  
52  
53

### 54 **Data Collection**

55  
56  
57  
58  
59  
60

1  
2  
3 Individual physician interviews were conducted in November and December 2016.  
4  
5 Interviews took place in a conference facility in the hospital area and were digitally  
6  
7 recorded. Each interview was scheduled to last 60 minutes, but with flexibility by the  
8  
9 researchers in order to allow participants to use their time as needed to discuss the issues,  
10  
11 resulting in an average of 74 minutes' duration. Notes were taken on each interview.  
12  
13

14  
15 Two researchers with complementary experience were present at all but one  
16  
17 interview, with one researcher leading while the other listened and took extensive notes,  
18  
19 occasionally interacting to further probe interesting aspects relating to the study aim. Both  
20  
21 researchers had solid experience with physician interviews. One interviewer has a PhD and a  
22  
23 background as an occupational physician with training in group therapy and many years of  
24  
25 experience counseling physicians both individually and in groups. The other interviewer has  
26  
27 a PhD in medical sciences and has a professional background as department head at a  
28  
29 university hospital, and experience in industrial engineering and management and training  
30  
31 in group relations theory.  
32  
33

### 34 35 **Analyses**

36  
37 To provide for a multifaceted interpretation of the rich empirical interview materials, the  
38  
39 analytical process involved a team of four researchers. The two researchers administering  
40  
41 the interviews were complemented by two additional researchers who added further  
42  
43 diversity to the research group. One of these was a senior PhD-level researcher with  
44  
45 experience in epidemiology and a professional background in surgical nursing; the other was  
46  
47 a senior health care researcher with a PhD in sociology.  
48  
49  
50

51  
52 The analytical process followed the principles of qualitative analysis<sup>38 39</sup>. All  
53  
54 interviews were transcribed verbatim and initially analyzed by the two interviewers. The  
55  
56  
57  
58  
59  
60

1  
2  
3 other two researchers listened to the audio recordings to experience the empirical material  
4  
5 and made individual notes. All transcripts were available to all four researchers. During the  
6  
7 analytic process, the interdisciplinary group of authors worked in parallel to enrich the  
8  
9 empirical interpretations and reduce the risk of any author overpowering the empirical  
10  
11 material or physicians' voices. This analytic process continued, with the two interviewers  
12  
13 working extensively with the transcribed interviews to outline a written account of  
14  
15 emerging themes substantiated by related quotes. This material was challenged, refined  
16  
17 and complemented during face-to-face meetings by the interdisciplinary and trans-  
18  
19 professional research group. Alternative interpretations were continuously sought through  
20  
21 critical reflections. This process continued iteratively until alternative understandings and  
22  
23 considerations were reconciled into a coherent result. Patton suggests that this type of  
24  
25 iterative research group triangulation is a way to reach comprehensive, robust and well-  
26  
27 developed findings from rich empirical material<sup>37</sup>.

### 28 29 30 31 32 33 **Ethics**

34  
35 This study complies with the World Medical Association's Declaration of Helsinki<sup>40</sup>. The risk  
36  
37 of harm to the interviewed physicians was very low, and thus the project did not meet the  
38  
39 criteria justifying a formal application to the ethics board, consistent with Norwegian law<sup>41</sup>.  
40  
41 The study aim, the role of the researchers and the right to withdraw at any stage was  
42  
43 explained before each interview. It was also explained that confidentiality would be handled  
44  
45 by not using direct quotes that could be linked to an individual or their role and that if in  
46  
47 doubt, the interviewee would be consulted. All interviewees signed informed written  
48  
49 consent before their interview was begun.  
50  
51  
52

### 53 54 **Results**

1  
2  
3 When invited to reflect on the interactions among professional fulfillment/satisfaction,  
4 organizational factors and quality of care, the interviewed physicians described various  
5 experiences with, and relationships among, the dimensions. Taken together, these  
6 individual experiences conveyed an empirically grounded understanding of the dynamic  
7 relationships. The results are structurally presented following the conceptual model in  
8 Figure 1.  
9  
10  
11  
12  
13  
14  
15

### 16 17 ***Relationships between Professional Fulfillment/Satisfaction and Quality of Care*** 18

19  
20 Physicians expressed that their professional fulfillment/satisfaction was fundamentally  
21 related to experiences with delivering high-quality care and patients being satisfied with  
22 that care.  
23  
24  
25

26  
27  
28 *Vital for job satisfaction is that we have an experience that things go well*  
29 *with our patients.*  
30  
31

32  
33 There was also an emergent awareness that patients tend to recognize when a  
34 physician is stressed at work. The dynamic relationships relating to providing good care and  
35 experiencing professional fulfillment/satisfaction was expressed by the physicians as  
36 mutually reinforcing.  
37  
38  
39  
40  
41

42  
43 *When there are double bookings, time and task collisions, etc., then one*  
44 *has to start working in a way I don't like. Stop looking at the patient, only*  
45 *look into the computer and be really fast. Focus on the one specific*  
46 *problem and not meet the person. I find this less satisfying and I think also*  
47 *patients notice when one is stressed.*  
48  
49  
50  
51  
52  
53  
54  
55  
56  
57  
58  
59  
60

1  
2  
3 The importance of continuity between patients and physician was brought up as a  
4  
5 central aspect of providing good care. The experience of patients being satisfied contributed  
6  
7 to an appreciated sense of accomplishment.  
8  
9

10 *What gives me satisfaction is when I greet my patients, operate on them*  
11  
12 *and follow up afterwards, so the patient is satisfied. That is all I wish for.*  
13  
14

15  
16 A consequence of patient care quality being such a strong driver of professional  
17  
18 fulfillment/satisfaction was that patient error negatively impacted the individual experience  
19  
20 of professional satisfaction.  
21  
22

23 *A given downside about being a surgeon is complications, it sort of comes*  
24  
25 *with the job. I had a severe surgical complication last week and that is*  
26  
27 *casting its light over everything, it impacted me fundamentally for many*  
28  
29 *days.*  
30  
31  
32

### 33 ***Relationships between Professional Fulfillment/Satisfaction and Organizational Factors***

34

35  
36 Physicians expressed how conversations at department meetings had changed. Previously,  
37  
38 these conversations were more about clinical care and now they mostly focused on the  
39  
40 need to meet production targets and finding ways to handle budgetary constraints. The  
41  
42 interviewed physicians expressed how quality was starting to be experienced as an empty  
43  
44 phrase, crowded out by production numbers and economic data.  
45  
46  
47

48 *Quality is more and more becoming an empty term in relation to what the*  
49  
50 *hospital values are. What we hear about is mostly economies and*  
51  
52 *numbers.*  
53  
54  
55  
56  
57  
58  
59  
60

1  
2  
3 This production focus was experienced as having an implicit assumption that the  
4 care delivered was of good and stable quality and that more output of the same quality  
5 could be created by increasing speed. This static, mechanistic way of understanding quality  
6 of care concerned the physicians.  
7  
8  
9  
10

11  
12  
13 *Everyone expects that treatments are first class. We only measure waiting*  
14 *times and epicrisis times and similar unimportant things. Everybody*  
15 *expects treatments to be the same and quality to be the same, no matter*  
16 *what. That is not true!*  
17  
18  
19  
20  
21

22  
23 For patient care quality, the primary driver of physicians' work satisfaction, this new  
24 emphasis on production numbers and economies resulted in physicians not recognizing the  
25 workplace. Changes in workplace conversations, combined with an experience of limited  
26 recognition for good professional work, made some physicians grapple with who they were  
27 becoming in their role as physicians. They experienced a change from being trustworthy and  
28 autonomous resources to becoming production workers.  
29  
30  
31  
32  
33  
34  
35

36  
37 *I don't feel that I come to work as a capable and autonomous resource*  
38 *anymore. I feel I come to work only to produce a certain number of*  
39 *procedures.*  
40  
41  
42  
43  
44

45 The struggle against time was also at the forefront in these interviews. The  
46 physicians described feeling uncomfortable with an increasing number of days and  
47 situations involving time and task collisions and concerns that this situation could jeopardize  
48 quality of care.  
49  
50  
51  
52  
53  
54  
55  
56  
57  
58  
59  
60



1  
2  
3 *There is a constant battle against time. We need time to make solid*  
4  
5 *evaluations before and after operations. We are pushing the limits toward*  
6  
7 *feeling uncomfortable. Definitely relating to quality of care.*  
8  
9

10 The consequences of the time struggles were not obvious. However, the physicians  
11  
12 experienced them as painful, with an impact on their fulfillment/satisfaction and health.  
13  
14

15  
16 *There is no obvious relationship, but from my point of view the*  
17  
18 *organizational factors are pretty painful right now. Suddenly you have one*  
19  
20 *of these time and task collisions and it increases work strain and stress,*  
21  
22 *impacting physical and mental health. You know, when you are expected*  
23  
24 *to be in three places at once, it sort of triggers your stress level.*  
25  
26  
27

28 For the physicians, there were frustrations with unforeseen variations in the daily  
29  
30 operating schedule. This could result in long work hours for surgeons and negatively impact  
31  
32 family life.  
33  
34

35  
36 *You do get a pause between operations that you can use to do a lot of*  
37  
38 *different things. You can read, talk or drink coffee. But the cost of this*  
39  
40 *unplanned pause is high when you have kids and a wife who you care for.*  
41  
42

43 While physicians expressed unease about internal conversations focusing more on  
44  
45 cost and production than quality, there was an awareness of the need for high productivity  
46  
47 and cost control.  
48  
49

50  
51 *I am one of those physicians who consider that health care has an*  
52  
53 *obligation to make sure we manage our resources and household with our*  
54  
55 *tax-based money.*  
56  
57

### ***Relationships between Organizational Factors and Quality of Care***

While the interviewed physicians appreciated swift and smooth operations, a new operating concept, with the explicit aim to increase output, troubled some. They expressed concerns about potential risks of patient complications since time limits were imposed to find anatomical landmarks and stop minor bleeding before proceeding to the next surgical step. With a dominating focus on quantity, there was an emergent worry whether individual quality standards were compromised.

*Maybe the key dilemma is that you are pushed about quantity all the time.*

*It leads you to start to feel, right after you go home from your on-call work, that you did not finish your task or finalize things the way you wanted to.*

*You get pushed to increase quantity and it is impacting your own reference of good-quality work.*

There were also experiences of stress upon entering the operating room, a work place sanctuary where physicians previously experienced that time was allowed to “stand still”.

*Over the last years, operating programs have expanded. It is not seldom that we push really hard to get through the program. As we are realizing we are not making it, you feel how stress is building up also in the operating room.*

Physicians expressed that there was less time for organized patient follow-up, compromising individual physician’s learning and self-correcting processes. The need for physicians to receive feedback about their own surgery and see the effects of their

1  
2  
3 treatment was stressed. This was not considered as important for the specific patient, but  
4  
5 crucial for systemic learning and thus for future patients' quality of care.  
6  
7

8 *We don't have time for follow-up; no, they fill up those lists at the*  
9  
10 *outpatient department such a long time in advance. So, if we need to have*  
11  
12 *a patient follow-up a week after the operation, it is not possible to*  
13  
14 *schedule that.*  
15

16  
17  
18 Several of the senior consultants had developed quality registers to gather data on  
19  
20 dimensions of quality of care for different patient groups. These were used when  
21  
22 colleagues, specialized in the same field, gathered to evaluate their work.  
23  
24

25 *We have very good collegial collaboration where everybody is interested in*  
26  
27 *the patient's treatment outcomes. So, getting feedback, either positive or*  
28  
29 *negative, is appreciated – because we are all in the same boat.*  
30  
31

32  
33 The hospital collects many metrics to analyze quality. However, some physicians had  
34  
35 limited knowledge about these hospital measurements and others expressed frustrations  
36  
37 about spending time reporting numbers with limited feedback about the results.  
38  
39

40  
41 *We collect data relating to infection prevalence, we are part of a patient*  
42  
43 *safety campaign, we do specific procedure paperwork, biweekly Global-*  
44  
45 *Trigger-Tool screenings and much more. These things are decided from*  
46  
47 *above. And the initial thought is typically good, but it triggers a lot of work*  
48  
49 *for many people and I just don't know where these numbers end up. What*  
50  
51 *does each initiative result in?*  
52  
53

#### 54 55 **Handling Dynamic and Complex Situations in Everyday Clinical Work** 56 57

1  
2  
3 The interviewed physicians emphasized the importance of delivering good-quality patient  
4 care, even if it meant stretching themselves to overcome hindering organizational factors.  
5  
6  
7 This way of ensuring quality care was considered common practice among them. However,  
8  
9  
10 the interviewed physicians were beginning to consider whether this compensation for  
11  
12 organizational shortcomings could have negative consequences for the quality of patient  
13  
14 care.

15  
16  
17 *One starts to wonder if this constant stretching of oneself can have*  
18  
19 *negative consequences. Like more patients expressing worries after their*  
20  
21 *operations.*

22  
23  
24  
25 While too little time in relation to patient work was the greatest concern, physicians  
26  
27 also expressed a constant struggle with work–home balance. The physicians related to a  
28  
29 “contract of conscience” with their patients, driving them to stretch themselves and spend  
30  
31 considerable time at work on top of normal hours. This was not a formal contract but rather  
32  
33 related to their professional identity as a physician.

34  
35  
36  
37 *I have to be there until the operation is finished. I am really concerned*  
38  
39 *whether I will be in time for kindergarten. It generates a lot of frustration,*  
40  
41 *but I have an implicit contract with the patient and an implicit contract*  
42  
43 *also to the hospital to make sure the operation is carried through.*

44  
45  
46  
47 Time struggles and a never-ending potential to do more for each patient is part of an  
48  
49 implicit assumption about working in health care. However, the interviewed physicians  
50  
51 expressed how this had accelerated.

1  
2  
3 *Everything has to happen at lightning speed. Things are never good*  
4  
5 *enough, I feel. It is not that they say this explicitly, but I constantly feel a*  
6  
7 *pressure to be effective. It feels as if we have to work more, producing the*  
8  
9 *same quality but with fewer resources. This is an enormous change*  
10  
11 *compared with some years ago.*  
12  
13

14  
15 Different individual initiatives to improve quality and facilitate every day work had  
16  
17 been initiated. One physician described saving time and increasing quality and safety by  
18  
19 making standard patient record templates for different operational procedures. Another  
20  
21 physician worked to schedule ward rounds to make them visible, instead of being something  
22  
23 that the physicians were supposed to squeeze in between other tasks.  
24  
25

26  
27 *We are measured on the number of operations we perform and on the*  
28  
29 *number of patients we see in the outpatient clinic. But we are not*  
30  
31 *measured on the time we spend on ward rounds. Talking with the doctor is*  
32  
33 *a major part of what patients appreciate when measuring patient*  
34  
35 *satisfaction. Now, ward rounds are scheduled.*  
36  
37  
38

39  
40 At the same time, there was a sense of disappointment that the organization did not  
41  
42 facilitate development work or recognize individual initiatives. Physicians suggested that the  
43  
44 hierarchical way of managing hospitals needs to be reconsidered.  
45  
46

47 *I think this is about hospital management still struggling to find a more*  
48  
49 *modern form. I find that teamwork is something that private enterprises*  
50  
51 *have focused on for a long time. But the old way of leading is still what*  
52  
53 *goes on in hospitals. With traditional hierarchies and top-down decisions.*  
54  
55  
56  
57  
58

1  
2  
3 There were thoughts about the need for changing today's hierarchical culture toward a  
4  
5 culture where employee involvement was considered the basis for clinical development.  
6  
7 There were suggestions that during changes, such as introducing fast-tracking, getting more  
8  
9 operations done, or changing resources, management needs to involve those concerned.  
10

11  
12 *If you are working with changes in such a fine-tuned and complex*  
13  
14 *environment as a hospital, one must involve those impacted by a change.*  
15  
16 *You put small groups of surgeons and op-nurses together. Provide them*  
17  
18 *some time to work on specific issues. Listen attentively to what they say*  
19  
20 *about key pressure points and act accordingly. Not simply pushing*  
21  
22 *decisions down at people! These are talented people who typically know*  
23  
24 *best what to do with clinical issues.*  
25  
26  
27  
28

### 29 **Strengths and Weaknesses**

30  
31  
32 This paper presents the results of the first phase of a three-year interactive research project.  
33  
34 Interactive research is considered a way to both work within relevant research areas and  
35  
36 contribute to clinical improvements<sup>35</sup>. Repeated collaboration between physicians and  
37  
38 researchers aims to create relevant research, increase physicians' understanding of their  
39  
40 own local work situation and, based on that outcome, to enable a development process of  
41  
42 locally initiated changes.  
43  
44  
45

46  
47 This first phase in the interactive study included a scheduled session during which  
48  
49 the researchers presented their initial findings to the group of physicians. These findings  
50  
51 clearly resonated with the group of physicians, both those who participated in interviews  
52  
53 and those who had heard how the researchers understood the local work situation. This is a  
54  
55  
56  
57  
58  
59

1  
2  
3 study strength that substantiates the findings and confirms the value of the interactive  
4  
5 research strategy.  
6  
7

8           This study has a potential weakness in that the empirical material was based on  
9  
10 interviews with only eight physicians. Group-based interviews could have allowed us to  
11  
12 interview many more physicians; however, given our priority to capture in-depth, nuanced  
13  
14 aspects of each physician's experiences, individual interviews were considered more  
15  
16 suitable. Having an interdisciplinary research group conduct the analytical work allowed  
17  
18 each interview to provide a rich, nuanced source of empirical information leading to  
19  
20 substantiated results that contribute to the research field. A strength was that although  
21  
22 these interviews were planned to last 60 minutes, the average interview lasted 74 minutes  
23  
24 (each interview contributing about 20 single-spaced pages of empirical material). Many  
25  
26 physicians willingly spent extra time on the interview, indicating that they found the study  
27  
28 aim and interview meaningful.  
29  
30  
31  
32  
33

34           Another strength is that the qualitative research process facilitated close attention to  
35  
36 the individual physicians' experiences, while simultaneously analytically striving to finding  
37  
38 an empirically grounded collective physicians' voice. A potential weakness of all interview-  
39  
40 based studies concerns the likelihood that what the interviewed physicians described was  
41  
42 actually related to their behaviors during clinical encounters with patients. By asking for  
43  
44 practical, specific examples we tried to ensure a focus on everyday realities; previous  
45  
46 research on this topic has concluded that what people present in interviews reflects their  
47  
48 perceptions, though those perceptions also inform their actions<sup>36 42</sup>.  
49  
50  
51  
52

53           While this study focused on a single clinical setting, we suggest that other health  
54  
55 care settings that employ physicians can learn from these findings. We base this  
56  
57  
58  
59  
60

1  
2  
3 generalizability on previous research showing communality among physicians across  
4  
5 different contexts in the West<sup>43</sup>, which Wenger calls one occupational community of  
6  
7 practice<sup>44</sup>.  
8  
9

## 10 **Discussion**

11  
12  
13 This study explores how physicians experience the interactions among professional  
14  
15 fulfillment/satisfaction, organizational factors and quality of care.  
16  
17

18         Our study participants described how providing high-quality care to patients was the  
19  
20 single most important dimension contributing to their professional fulfillment/satisfaction.  
21  
22 The interplay between clinical work and organizational factors was often experienced as  
23  
24 resulting in complex and challenging situations, such as being scheduled to operate while  
25  
26 also having to run to the ward to check on patients or running late to pick up children from  
27  
28 daycare because shift times between operations ran longer than planned. The interviewed  
29  
30 physicians primarily handled this individually, by stretching themselves and working around  
31  
32 organizational hindrances in order to provide good patient care.  
33  
34  
35

36  
37         Interestingly and somewhat discouragingly for the health care development  
38  
39 enterprise is that the interviewed physicians expressed great frustration but little aspiration  
40  
41 or practical opportunity to actively contribute to altering dysfunctional organizational  
42  
43 factors. Instead, the prevailing strategy was that each individual physician came up with  
44  
45 their unique “workarounds” and proceeded to address each day’s assigned work.  
46  
47  
48

49         The conceptual triangle (Figure 1) will be used as a guiding structure in the following  
50  
51 discussion of these findings.  
52  
53

### 54 ***Relationships between Professional Fulfillment/Satisfaction and Quality of Care***



1  
2  
3 The interviewed physicians explicitly stated that being able to deliver good-quality patient  
4  
5 care was fundamental to experiencing professional fulfillment/satisfaction. The experience  
6  
7 that things go well with the patient was crucial for physicians' fulfillment/satisfaction. This  
8  
9 has also been found in previous studies<sup>45 46</sup> and can also be understood in light of the long-  
10  
11 standing development of the physician's identity from Hippocrates to more modern  
12  
13 medicine (e.g., Osler<sup>47</sup>) consistently focusing on patient well-being. A 2018 review of  
14  
15 clinicians' well-being by the National Academy of Medicine stated "At the center is patient  
16  
17 well-being; without the patient, there is no clinician"<sup>48</sup>.  
18  
19

20  
21  
22 The physician interviewees also considered a reciprocal relationship, wherein  
23  
24 physicians' dissatisfaction can negatively impact quality of care. This mutual and dynamic  
25  
26 relationship is consistent with research showing that nonfunctional work conditions and  
27  
28 physicians with low fulfillment/satisfaction negatively impact the quality and safety of  
29  
30 patient care<sup>8 10 11</sup>. While the professional identity of physicians has hinged on delivering  
31  
32 good patient care quality, more recently, physician well-being has also been recognized as a  
33  
34 potential indicator of quality care<sup>3</sup>. Jean Wallace et al. took this issue further to suggest that  
35  
36 physician well-being might be a reasonable overall indicator of health care quality<sup>49</sup>. In the  
37  
38 2017 revision of the Declaration of Geneva, as adopted by the World Medical Association, a  
39  
40 new addition addresses this: "I will attend to my own health, well-being and abilities in  
41  
42 order to provide care of the highest standard".  
43  
44  
45

#### 46 47 ***Relationships between Professional Fulfillment/Satisfaction and Organizational Factors*** 48

49  
50 Our study participants emphasized that organizational factors were mostly hindering their  
51  
52 professional fulfillment/satisfaction. The interviewees reported that managers were more  
53  
54 concerned with production numbers and economies, while patient outcomes were viewed  
55  
56  
57

1  
2  
3 as less important to talk about. The emphasis on production focus and budget concerns led  
4  
5 to an experience of estrangement. Physicians no longer felt aligned with workplace values;  
6  
7 in addition, limited management recognition for good-quality patient work led to their  
8  
9 sense of being disoriented in relation to their professional identity. Physicians expressed this  
10  
11 as a role change, from being a trusted resource to being more like a “cog in a wheel.”  
12  
13

14  
15 Epstein echoed this finding; “Physicians, disillusioned by the productivity orientation  
16  
17 of administrators and absence of affirmation for the values and relationships that sustain  
18  
19 their sense of purpose, need enlightened leaders who recognize that medicine is a human  
20  
21 endeavor and not an assembly line”<sup>50</sup>.  
22  
23

24  
25 Previous researchers have argued that physicians’ professional engagement and  
26  
27 fulfillment derives from doing tasks that contribute to the experience of developing and  
28  
29 contributing<sup>14</sup>. Traditionally, physicians have been able to experience this when focusing on  
30  
31 providing excellent care by meeting individual patient needs. Managers, on the other hand,  
32  
33 need to cater to the overarching perspective, providing good care to as many patients as  
34  
35 possible within the existing budget<sup>51</sup>. Bridging this perspective gap has proven difficult since  
36  
37 it requires both managers with a developed mindset to better understand physicians, and  
38  
39 physicians with a developed mindset to better understand managers<sup>20</sup>.  
40  
41  
42  
43

44  
45 A study comparing views about priority setting between physicians/nurses and  
46  
47 managers found clear differences in how they talked about and understood prioritization<sup>52</sup>.  
48  
49 Physicians and nurses often chose a nearness practice, wherein the individual patient was  
50  
51 prioritized, while managers tried to ensure that as many patients as possible received, or  
52  
53 would receive, good care. Prioritization was a cause of constant concern. Clinicians  
54  
55 experienced a threat to autonomy and professional ideals. Managers empathized with  
56  
57  
58  
59

1  
2  
3 clinicians but perceived patient flow and budget balance as more important. Both groups  
4  
5 wanted to “make a difference”, but paradoxically, neither found a way to reconcile their  
6  
7 view with that of the other. Stacey and Mowles suggested that different perspectives make  
8  
9 mutual understanding challenging. They further argued that how local conversations are  
10  
11 experienced is very important, since that is the fuel for individual sense-making about what  
12  
13 is recognized at the local workplace. Recognition of others’ way of seeing the world is  
14  
15 considered the fuel for innovational process work to self-organize <sup>53</sup>.

16  
17  
18  
19  
20  
21  
22  
23  
24  
25  
26  
27  
28  
29  
30  
31  
32  
33  
34  
35  
36  
37  
38  
39  
40  
41  
42  
43  
44  
45  
46  
47  
48  
49  
50  
51  
52  
53  
54  
55  
56  
57  
58  
59  
60  
There is a definite need for more enlightened health care leaders to manage the complex endeavor of providing a guiding beacon toward meaningfulness and engagement, while simultaneously balancing a constrained budget. There is also a need for more enlightened physicians who actively engage with leaders to further evolve clinical practice, in relation to both the individual patient and future patients. Leaders need to remember that providing good patient care is facilitated by organizational arrangements that also care for the providers. It might be prudent to clarify that organizing functional work processes is a fundamental managerial responsibility.

While limited time with patients was a concern, work–home balance was also brought up as an issue that troubled the interviewed physicians. A “contract of conscience with the patient” was mentioned as something that drove physicians to spend considerable extra time at the hospital, with negative consequence on their presence at home. Swedish medical students and young physicians considered balancing work, family and leisure time more important than salary level or career <sup>54</sup>. This was similarly expressed by younger Norwegian physicians, who spoke about the necessity to see their work as “a job” in contrast to thinking about it as “a lifestyle” <sup>55</sup>. This view is consistent with “downshifting”, a

1  
2  
3 societal change defined by some researchers as an endorsement of the question, “In the last  
4  
5 ten years, have you voluntarily made a long-term change in your lifestyle, other than  
6  
7 planned retirement, which has resulted in you earning less money?”. More time with family  
8  
9 was the most important reason for downshifting, followed by the desire to gain more  
10  
11 control and personal fulfillment<sup>56</sup>.  
12  
13

### 14 ***Relationships between Organizational Factors and Quality of Care***

15  
16  
17 Faced with an accelerating struggle against time and many organizational frustrations, the  
18  
19 interviewed physicians described stretching themselves to deliver quality care. The  
20  
21 experience of having less time and more work resonates across many health care studies.  
22  
23 Morrison and Smith described physician experiences with running faster but not getting  
24  
25 anywhere and coined the term “hamster wheel health care”<sup>57</sup>.  
26  
27  
28  
29

30 While there was an awareness among the study participants of increased workplace  
31  
32 stress, stretching oneself was considered the only way to handle organizational  
33  
34 shortcomings. It is notable that some physicians questioned whether this long-held tradition  
35  
36 might actually have negative consequences for the quality of patient care. The  
37  
38 organizational psychologist Edgar Schein used the term “basic assumptions” for those  
39  
40 aspects of work that define what to pay attention to and what actions to take in various  
41  
42 situations<sup>58</sup>. Another term, “taken-for-granted assumptions”, is used to emphasize how  
43  
44 these are seldom reflected upon, since they are so deeply integrated in the professional  
45  
46 identity. Schein concludes that, “These choices are only partially attributable to ‘personality’  
47  
48 or ‘temperament’; rather, they depend on our situational understandings that have been  
49  
50 taught to us by our socialization experiences”<sup>58</sup>.  
51  
52  
53  
54  
55  
56  
57  
58  
59  
60

1  
2  
3 It is interesting that these basic assumptions among the interviewed physicians  
4  
5 became more open to scrutiny via the research interviews. It may be a tribute to the depth  
6  
7 of the interview conversations but may also indicate that physicians have stretched  
8  
9 themselves to a limit that is becoming unbearable. Previous research informs us that  
10  
11 physicians seeking counseling for work-related burnout report the use of emotional coping  
12  
13 strategies like self-blame and wishful thinking<sup>59</sup> as motivations in an endless stretching of  
14  
15 oneself, to handle a situation<sup>60</sup>. The use of more comprehensive coping strategies will  
16  
17 expose the need for work environment changes<sup>60</sup>. While individual stress management  
18  
19 training has been the preferred coping strategy for physicians, research has shown that this  
20  
21 needs to be seen as a responsibility shared by health care systems and individual physicians  
22  
23  
24  
25  
26<sup>23</sup>. Individual resilience training is still valuable but needs to be complemented by an  
27  
28 organization that facilitates engagement and well-being.  
29  
30

31 Leadership skills among physicians' immediate supervisors and supportive  
32  
33 considerate organizational structures are key dimensions to facilitate physicians' well-being  
34  
35<sup>4 22</sup> and engagement<sup>61</sup>. Arguments have been made for a linear relationship between the  
36  
37 extent to which leaders are empathic, engaged, and involved with their employees, and the  
38  
39 levels of burnout and satisfaction<sup>17</sup>. The physicians interviewed for this study described  
40  
41 individual initiatives to improve clinical practice but experienced a lack of organizational  
42  
43 structure that promoted individual initiatives to benefit all physicians at the department.  
44  
45  
46

#### 47 ***Physicians' Strategies to Handle the Dynamic Interactions Relating to***

#### 48 ***Fulfillment/Satisfaction, Organization and Quality of Care***

49  
50  
51  
52  
53 When the interviewed physicians reflected on the relationships relating to  
54  
55 fulfillment/satisfaction, organization and quality, they brought up the dynamic aspect and  
56  
57  
58  
59  
60

1  
2  
3 pointed to how reciprocity and mutuality seemed to exist among the different dimensions.  
4  
5 The interdependence they described is a typical pattern in complex phenomena<sup>53 62</sup>. The  
6  
7 study participants expressed frustrations regarding less functional organizational factors  
8  
9 that hinder them, or at least did not facilitate their carrying out the work of providing good  
10  
11 care. The prevailing strategy to handle these frequently recurring situations was that each  
12  
13 physician invented their own workarounds to accomplish their clinical work. There was little  
14  
15 expression of aspiration, or actual activity, toward physicians working to find more  
16  
17 permanent solutions to organizational challenges.  
18  
19

20  
21  
22 This behavior of limited physician engagement in organizational development work  
23  
24 has been described previously<sup>61 63 64</sup> and primarily relates to physicians having been trained  
25  
26 as biomedical experts, based on the biomedical science of certainty. Berwick and Nolan  
27  
28 argue that development work and improving clinical processes requires different skills than  
29  
30 those considered traditional for a clinical physician<sup>65</sup>. Improvement work is based on the  
31  
32 science of uncertainty where paradox and surprising outcomes are to be expected. It  
33  
34 involves balancing relations and the different interests of multiple employee groups.  
35  
36

37  
38  
39 Thus, while physicians' engagement in development work has been reported to be a  
40  
41 challenge, interviewees expressed frustration with not being involved by management,  
42  
43 especially on issues where clinical experience would have been valuable for good decision-  
44  
45 making. This is consistent with research showing that physicians with the same specialty and  
46  
47 seniority and working in the same department had different ways of finding fulfillment at  
48  
49 work. Some "we-centered" physicians considered that improving clinical processes  
50  
51 contributed to a sense of professional fulfillment. Other, "I-centered", physicians only found  
52  
53 engagement and professional joy from working with patients<sup>66</sup>. Thus, while different ways  
54  
55  
56  
57  
58  
59  
60

1  
2  
3 of understanding one's professional identity as a physician contribute to different work  
4  
5 focus, another study found that a common denominator for engagement among physicians  
6  
7 is related to whether a specific task contributed to an individually-defined experience of  
8  
9 making progress/learning and being useful/contributing<sup>14</sup>.  
10

11  
12 Some of the interviewed physicians reported developing their own practical  
13  
14 solutions in order to speed up processes or to secure quality care, yet beyond promoting  
15  
16 their individual approach at collegial lunch conversations or other informal settings, it was  
17  
18 difficult to move from individual innovation to group benefits. Our study participants did not  
19  
20 experience an open and supportive management culture; instead, there were accounts of a  
21  
22 hierarchical top-down management structure. A longitudinal intervention study showed  
23  
24 that focusing on five domains could change hierarchical hospital cultures: (1) Learning  
25  
26 environment (i.e., a climate that promotes and rewards enquiry and experimentation); (2)  
27  
28 Psychological safety (i.e., a shared belief that it is safe to take risks interpersonally and to  
29  
30 speak up without punishment); (3) Senior management support (i.e., fostering a shared  
31  
32 purpose and vision for change and empowering line leaders to enact that vision); (4)  
33  
34 Commitment to the organization (i.e., employees' desire to stay, based on their  
35  
36 identification with and attachment to the organization); and (5) Time allocated for  
37  
38 improvement efforts (i.e., for planning, reflection and feedback)<sup>67 68</sup>.  
39  
40  
41  
42  
43  
44

45  
46 Recognition and continuity, along with task and role clarity, are organizational  
47  
48 conditions that have been found to facilitate physicians' engagement with regard to  
49  
50 improving clinical services and processes<sup>69</sup>. With a structure for work improvements in  
51  
52 place, where time is scheduled and work tasks are defined, management can send signals  
53  
54 that improvement is both prioritized and included within the local physician role.  
55  
56  
57  
58  
59  
60

1  
2  
3 Engaging physicians in development work challenges the core of many leadership  
4 practices<sup>64</sup>. However, taking physicians' engagement seriously also contributes important  
5 results. One study assessing a participatory change process in which physicians analyzed  
6 work-related problems created local solutions which were then implemented; as a result,  
7 physicians' working conditions and patients' perceived quality of care both showed positive  
8 changes<sup>21</sup>. Another study showed that physicians who were actively involved in the process  
9 of changing the local ward round experienced better-informed clinical decisions, had fewer  
10 follow-up questions from their patients and increased their own professional fulfillment<sup>70</sup>.  
11  
12  
13  
14  
15  
16  
17  
18  
19  
20  
21

22 The importance of managers and physicians working together to increase value to  
23 patients and citizens has always been a focus within health care. Recent research has  
24 emphasized that a deliberate, collaborative process at the local workplace is key to reducing  
25 physician burnout and promoting engagement<sup>22 71</sup>. The active involvement of physicians in  
26 driving meaningful change at the local workplace is central to physician professional  
27 fulfillment/satisfaction. Thus, there is unrealized potential in focusing on physician well-  
28 being and evolving the increasingly complex health system toward better patient care.  
29  
30  
31  
32  
33  
34  
35  
36  
37  
38

### 39 **Conclusions**

40  
41  
42 This exploration of physicians' understanding of the interactions related to professional  
43 fulfillment/satisfaction, organizational factors and quality of patient care revealed that in  
44 order to maintain quality care, individual physicians stretch themselves to overcome  
45 organizational shortcomings. Such stretching is no longer a feasible strategy without  
46 compromising both professional fulfillment/satisfaction and quality of patient care.  
47  
48  
49  
50  
51  
52  
53

54 The experiences among physicians who report that they are being stretched well  
55 beyond their comfort zones, in combination with frustration and/or resignation over few  
56  
57  
58  
59  
60



1  
2  
3 possibilities to actively alter dysfunctional organizational factors, create unhealthy  
4  
5 workplaces.  
6  
7

8 To secure both quality care and professional fulfillment/satisfaction for physicians,  
9  
10 organizational factors must be put in place that facilitate physicians' engagement in  
11  
12 improving the ease of working at the local workplace. To benefit from physicians  
13  
14 engagement in handling complex clinical challenges, physicians should participate in  
15  
16 defining which problems to prioritize in collaboration with management and other health  
17  
18 professionals. While sounding surprisingly self-evident, it could be prudent to recall that this  
19  
20 type of engagement in improvement work has neither been part of the traditional medical  
21  
22 curricula nor of the professional identity as physicians.  
23  
24  
25  
26

27 The interactive research model presented herein provides a structured way for  
28  
29 researchers to support this way of working. In this process, we elicited individual physicians'  
30  
31 voices about their local workplace, analyzed them and combined individual voices into a  
32  
33 coherent workplace voice. Presenting this aggregated expression of their situation to the  
34  
35 group of physicians in the concerned department created a starting point for local  
36  
37 improvement processes. As such, physicians were involved in the work of local  
38  
39 improvement: suggesting, trying and evaluating improvements to clinical processes, co-  
40  
41 created with local management.  
42  
43  
44  
45

46 We thus suggest that the traditional strategy by physicians of individually stretching  
47  
48 themselves and focusing on the individual patient is no longer a viable single solution. This  
49  
50 needs to be complemented by management strategies that facilitate individual physicians'  
51  
52 engagement in the continuous work of improving clinical processes. Health care  
53  
54  
55  
56  
57  
58  
59  
60

1  
2  
3 management has a central role and is responsible for ensuring time and planned forums for  
4  
5 physicians to further engage in contributing to meaningful changes.  
6  
7

### 8 **Practice Implications**

9

10 Collaborative studies show positive effects from collecting individual physicians'  
11  
12 experiences, analyzing the resulting interview material for commonalities and feeding it  
13  
14 back in a consolidated and actionable form. This external and structured view helps  
15  
16 physicians and managers identify important areas for local organizational change and  
17  
18 facilitates the active involvement of physicians in the change process. The interactive  
19  
20 research model used herein is consistent with this approach.  
21  
22  
23  
24  
25

### 26 **Contributorship**

27

28  
29 The lead author, hereby ensures that all four authors meet the conditions outlined in the  
30  
31 ICMJE recommendations.  
32  
33

- 34 • Substantial contributions to the conception or design of the work, or the acquisition,  
35  
36 analysis or interpretation of data.  
37
- 38 • Drafting the work or revising it critically for important intellectual content.  
39
- 40 • Final approval of the version published.  
41
- 42 • Agreement to be accountable for all aspects of the work in ensuring that questions  
43  
44 related to the accuracy or integrity of any part of the work are appropriately investigated  
45  
46 and resolved. There is no one who fulfills the criteria that has been excluded as an author.  
47  
48  
49

### 50 **Role of the Funding Source**

51

52  
53 This work was supported by Den norske legeforeningens fond for kvalitetsforbedring og  
54  
55 pasientsikkerhet (Norwegian Fund for Quality Improvements and Patient Safety) grant  
56  
57  
58  
59

1  
2  
3 number 16 / 5234. We confirm researcher independence from the funders and that all  
4  
5 authors had full access to all data in the study and can take responsibility for the integrity of  
6  
7 the data, the accuracy of the data analysis, results and conclusions.  
8  
9

### 10 **Conflicts of Interest**

11  
12  
13 No competing interests exist for any of the researchers involved in this article.  
14  
15

### 16 **Transparency declaration**

17  
18 The lead author affirms that this manuscript is an honest, accurate, and transparent account  
19  
20 of the study being reported; that no important aspects of the study have been omitted; and  
21  
22 that any discrepancies from the study as planned have been explained.  
23  
24  
25

### 26 **Data sharing Statement**

27  
28 Interview transcript are the empirical source. These are only for the assigned research group  
29  
30 in order to honor the commitment with interviewed physicians.  
31  
32  
33  
34  
35  
36  
37  
38  
39  
40  
41  
42  
43  
44  
45  
46  
47  
48  
49  
50  
51  
52  
53  
54  
55  
56  
57  
58  
59  
60

## References

1. Berwick D. Crossing the boundary: changing mental models in the service of improvement. *Int J Qual Health Care* 1998;**10**(5):435-41.
2. Sikka R, Morath JM, Leape L. The Quadruple Aim: care, health, cost and meaning in work. *BMJ Qual Saf* 2015:bmjqs-2015-004160.
3. West CP. Physician Well-Being: Expanding the Triple Aim. *J Gen Intern Med* 2016:1-2.
4. Bodenheimer T, Sinsky C. From Triple to Quadruple Aim: Care of the Patient Requires Care of the Provider. *Ann Fam Med* 2014;**12**(6):573-76.
5. Dyrbye LN, Trockel M, Frank E, et al. Development of a Research Agenda to Identify Evidence-Based Strategies to Improve Physician Wellness and Reduce Burnout. *Ann Intern Med* 2017.
6. Sinsky CA, Willard-Grace R, Schutzbank AM, et al. In search of joy in practice: a report of 23 high-functioning primary care practices. *Ann Fam Med* 2013;**11**(3):272-78.
7. Firth-Cozens J, Greenhalgh J. Doctors' perceptions of the links between stress and lowered clinical care. *Soc Sci Med* 1997;**44**(7):1017-22.
8. West CP, Tan AD, Habermann TM, et al. Association of resident fatigue and distress with perceived medical errors. *JAMA* 2009;**302**(12):1294-300.
9. Shanafelt TD, Bradley KA, Wipf JE, et al. Burnout and self-reported patient care in an internal medicine residency program. *Ann Intern Med* 2002;**136**(5):358-67.
10. Angerer P, Weigl M. Physicians' Psychosocial Work Conditions and Quality of Care: A Literature Review. *Professions and Professionalism* 2015;**5**(1).
11. Scheepers RA, Boerebach BCM, Arah OA, et al. A Systematic Review of the Impact of Physicians' Occupational Well-Being on the Quality of Patient Care. *Int J Behav Med* 2015;**22**(6):683-98.
12. Le Grand J. *Motivation, agency, and public policy: of knights and knaves, pawns and queens: Oxford University Press on Demand*, 2003.
13. Eijkenaar F, Emmert M, Scheppach M, et al. Effects of pay for performance in health care: a systematic review of systematic reviews. *Health Policy* 2013;**110**(2):115-30.
14. Lindgren Å, Bååthe F, Dellve L. Why risk professional fulfilment: a grounded theory of physician engagement in healthcare development. *Int J Health Plann Manage* 2013;**28**(2):e138-e57.
15. Khullar D, Chokshi DA, Kocher R, et al. Behavioral economics and physician compensation—promise and challenges. *N Engl J Med* 2015;**372**(24):2281-83.
16. Knorring Mv, Dept of Clinical N, Inst för klinisk n, et al. The manager role in relation to the medical profession, 2012.
17. Shanafelt TD, Gorringer G, Menaker R, et al. Impact of organizational leadership on physician burnout and satisfaction. *Mayo Clin Proc* 2015;**90**(4):432-40.
18. von Knorring M, Alexanderson K, Eliasson MA. Healthcare managers' construction of the manager role in relation to the medical profession. *J Health Organ Manag* 2016;**30**(3):421-40.
19. McKinlay JB, Marceau L. New Wine in an Old Bottle: Does Alienation Provide an Explanation of the Origins of Physician Discontent? *Int J Health Serv* 2011;**41**(2):301-35.
20. Baathe F, Norback LE. Engaging physicians in organisational improvement work. *J Health Organ Manag* 2013;**27**(4):479-97.
21. Weigl M, Hornung S, Angerer P, et al. The effects of improving hospital physicians working conditions on patient care: a prospective, controlled intervention study. *BMC Health Serv Res* 2013;**13**(1):1.
22. Shanafelt TD, Noseworthy JH. Executive Leadership and Physician Well-being: Nine Organizational Strategies to Promote Engagement and Reduce Burnout. *Mayo Clin Proc* 2017;**92**(1):129-46.
23. West CP, Dyrbye LN, Shanafelt TD. Physician burnout: contributors, consequences and solutions. *J Intern Med* 2018.

- 1
- 2
- 3 24. Glouberman S, Zimmerman B. Complicated and complex systems: what would successful reform
- 4 of Medicare look like? *Romanow Papers* 2002;**2**:21-53.
- 5 25. Stacey RD. *Strategic management and organisational dynamics: the challenge of complexity to*
- 6 *ways of thinking about organisations*. Harlow, England: Financial Times Prentice Hall, 2011.
- 7 26. Suchman A. Organizations as Machines, Organizations as Conversations: Two Core Metaphors
- 8 and Their Consequences. *Med Care* 2011;**49**:S43.
- 9 27. Plsek P, Greenhalgh T. The challenge of complexity in health care: an introduction. *BMJ*
- 10 2001;**323**(7314):625-28.
- 11 28. Crabtree BF, Nutting PA, Miller WL, et al. Primary care practice transformation is hard work:
- 12 insights from a 15-year developmental program of research. *Med Care* 2011;**49**(Suppl):S28.
- 13 29. Sturmberg JP, Martin CM, Katerndahl DA. Systems and complexity thinking in the general
- 14 practice literature: an integrative, historical narrative review. *Ann Fam Med* 2014;**12**(1):66-
- 15 74.
- 16 30. Institute Of Medicine Committee on Quality of Health Care. *Crossing the quality chasm: a new*
- 17 *health system for the 21st century*. Washington, D.C: National Academy Press, 2001.
- 18 31. Prigogine I, Stengers I. *The end of certainty: time, chaos and the new laws of nature*. New York:
- 19 The Free Press, 1997.
- 20 32. Burnes B. *Managing change: a strategic approach to organisational dynamics*. New York:
- 21 Prentice Hall/Financial Times, 2009.
- 22 33. Capra F, Luisi PL. *The systems view of life: A unifying vision*: Cambridge University Press, 2014.
- 23 34. Ellström PE, Rönqvist D, Thunborg C. *Omvård, verksamhet och förändrade kompetenskrav inom*
- 24 *hälso- och sjukvården: en studie av föreställningar hos centrala aktörer inom ett landsting*:
- 25 Linköpings universitet. Institutionen för pedagogik och psykologi, 1994.
- 26 35. Greenhalgh T, Robert G, Macfarlane F, et al. Diffusion of Innovations in Service Organizations:
- 27 Systematic Review and Recommendations. *Milbank Q* 2004;**82**(4):581-629.
- 28 36. Kvale S, Brinkmann S. *Den kvalitativa forskningsintervjun*. Lund: Studentlitteratur, 2009.
- 29 37. Patton MQ. *Qualitative research & evaluation methods*. London: SAGE, 2002.
- 30 38. Miles MB, Huberman AM. *Qualitative data analysis : an expanded sourcebook*. Thousand Oaks,
- 31 CA: Sage, 1994.
- 32 39. Miles MB, Huberman AM, Saldaña J. *Qualitative data analysis: A methods sourcebook*: SAGE
- 33 Publications, Incorporated, 2013.
- 34 40. World Medical Association. World medical association declaration of helsinki: Ethical principles
- 35 for medical research involving human subjects. *JAMA* 2013;**310**(20):2191-94.
- 36 41. Helse- og omsorgsdepartementet. Lov om medisinsk og helsefaglig forskning
- 37 (helseforskningsloven) <https://lovdata.no/dokument/NL/lov/2008-06-20-44>. LOV-2008-06-
- 38 20-44.
- 39 42. Czarniawska B. *Narratives in social science research*. London: SAGE, 2004.
- 40 43. Van Maanen J, Barley SR. Occupational communities: culture and control in organizations. *Res*
- 41 *Organ Behav*, 1984:287-365.
- 42 44. Wenger E. Communities of Practice and Social Learning Systems. *Organization* 2000;**7**(2):225-46.
- 43 45. Bovier PA, Perneger TV. Predictors of work satisfaction among physicians. *Eur J Public Health*
- 44 2003;**13**(4):299-305.
- 45 46. West CP, Huschka MM, Novotny PJ, et al. Association of perceived medical errors with resident
- 46 distress and empathy: A prospective longitudinal study. *JAMA* 2006;**296**(9):1071-78.
- 47 47. Bliss M. *William Osler: a life in medicine*. . New York: Oxford University Press, 1999.
- 48 48. Brigham T, Barden C, Dopp AL, et al. A Journey to Construct an All-Encompassing Conceptual
- 49 Model of Factors Affecting Clinician Well-Being and Resilience: NAM Perspectives, Discussion
- 50 Paper. National Academy of Medicine, Washington, DC. [https://nam.](https://nam.edu/journey-construct-encompassing-conceptualmodel-factors-affecting-clinician-well-resilience/)
- 51 [edu/journey-construct-](https://nam.edu/journey-construct-encompassing-conceptualmodel-factors-affecting-clinician-well-resilience/)
- 52 [encompassing-conceptualmodel-factors-affecting-clinician-well-resilience/](https://nam.edu/journey-construct-encompassing-conceptualmodel-factors-affecting-clinician-well-resilience/). Published
- 53 January 28, 2018. Accessed April 10, 2018.
- 54
- 55
- 56
- 57
- 58
- 59
- 60

- 1
- 2
- 3 49. Wallace J, Lemaire J, Ghali W. Physician wellness: a missing quality indicator. *The Lancet* 2009;**374**(9702):1714-21.
- 4
- 5 50. Epstein RM, Privitera MR. Doing something about physician burnout. *The Lancet* 2016;**388**(10057):2216-17.
- 6
- 7 51. Storkholm MH, Mazzocato P, Savage M, et al. Money's (not) on my mind: a qualitative study of 8 how staff and managers understand health care's triple Aim. *BMC Health Serv Res* 9 2017;**17**(1):98.
- 10 52. Skirbekk H, Hem MH, Nortvedt P. Prioritising patient care: The different views of clinicians and 11 managers. *Nurs Ethics* 2017:0969733016664977.
- 12 53. Stacey RD, Mowles C. *Strategic management and organisational dynamics: the challenge of 13 complexity to ways of thinking about organisations*. Harlow, United Kingdom: Pearson 14 Education, 2016.
- 15 54. Diderichsen S. *It's just a job: a new generation of physicians dealing with career and work ideals*. 16 Umeå universitet, 2017.
- 17 55. Hertzberg TK, Isaksson Rø K, Vaglum P, et al. Work-home interface stress: an important predictor 18 of emotional exhaustion 15 years into a medical career. *Ind Health* 2016;**54**(2):139-48.
- 19 56. Hamilton C. Downshifting in Britain. A sea-change in the pursuit of happiness 2003;**2**.
- 20 57. Morrison I, Smith R. *Hamster Health Care: Time To Stop Running Faster And Redesign Health 21 Care*. *BMJ: British Medical Journal* 2000;**321**(7276):1541-42.
- 22 58. Schein EH. *Organizational culture and leadership*. Fifth edition / Edgar H. Schein with Peter 23 Schein ed: Hoboken : Wiley, 2017.
- 24 59. Folkman S, Lazarus RS. An analysis of coping in a middle-aged community sample. *J Health Soc 25 Behav* 1980:219-39.
- 26 60. Isaksson Ro K, Tyssen R, Hoffart A, et al. A three-year cohort study of the relationships between 27 coping, job stress and burnout after a counselling intervention for help-seeking physicians. 28 *BMC Public Health* 2010;**10**(1):213.
- 29 61. Bååthe F. *Physicians' engagement: qualitative studies exploring physicians' experiences of 30 engaging in improving clinical services and processes [Doctoral thesis,]. Sahlgrenska 31 Academy at the University of Gothenburg, 2015.*
- 32 62. Prigogine I. Beyond Being and Becoming. *New Perspectives Quarterly* 2004;**21**(4):5-12.
- 33 63. Davies H, Powell A, Rushmer R. Why don't clinicians engage with quality improvement? *J Health 34 Serv Res Policy* 2007;**12**(3):129-30.
- 35 64. Dickson G. *Anchoring physician engagement in vision and values: principles and framework*. 36 Saskatchewan: Regina Qu'Appelle Health Region 2012.
- 37 65. Berwick DM, Nolan TW. Physicians as leaders in improving health care: a new series in *Annals of 38 Internal Medicine*. *Ann Intern Med* 1998;**128**(4):289-92.
- 39 66. Bååthe F, Ahlborg G, Edgren L, et al. Uncovering paradoxes from physicians' experiences of 40 patient-centered ward-round. *Leadersh Health Serv* 2016;**29**(2).
- 41 67. Curry LA, Brault MA, Linnander EL, et al. Influencing organisational culture to improve hospital 42 performance in care of patients with acute myocardial infarction: a mixed-methods 43 intervention study. *BMJ Qual Saf* 2018;**27**(3):207-17.
- 44 68. Bradley EH, Brewster AL, McNatt Z, et al. How guiding coalitions promote positive culture change 45 in hospitals: a longitudinal mixed methods interventional study. *BMJ Qual Saf* 46 2018;**27**(3):218.
- 47 69. Bååthe F, Erik Norbäck L. Engaging physicians in organisational improvement work. *J Health 48 Organ Manag* 2013;**27**(4):479-97.
- 49 70. Baathe F, Ahlborg Jr G, Lagström A, et al. Physician experiences of patient-centered and team- 50 based ward rounding – an interview based case-study. *J Hosp Adm* 2014;**3**(6):127-42.
- 51 71. Swensen S, Kabcenell A. Physician-Organization Collaboration Reduces Physician Burnout and 52 Promotes Engagement: The Mayo Clinic Experience. *J Healthc Manag* 2016;**61**(2):105-27 53 23p.
- 54
- 55
- 56
- 57
- 58
- 59
- 60

1  
2  
3  
4  
5  
6  
7  
8  
9  
10  
11  
12  
13  
14  
15  
16  
17  
18  
19  
20  
21  
22  
23  
24  
25  
26  
27  
28  
29  
30  
31  
32  
33  
34  
35  
36  
37  
38  
39  
40  
41  
42  
43  
44  
45  
46  
47  
48  
49  
50  
51  
52  
53  
54  
55  
56  
57  
58  
59  
60

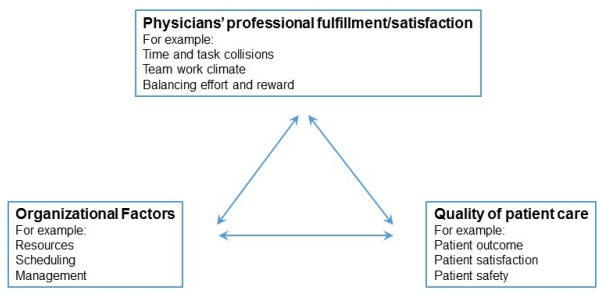

Figure 1. Conceptual model used in the interview situation

338x190mm (96 x 96 DPI)

## Interview guide:

- Describe your role as physician here at the hospital
  - Position, seniority (consultant, resident, intern), specialty/sub-specialty, researcher
- Describe a day when you go home happy/satisfied/content with your workday
  - Describe another day when you go home and are not happy/satisfied/content
    - What are your thoughts about what it is that makes the difference?
- What are your experiences from the interactions between physician's professional fulfillment/satisfaction, organizational factors and quality of patient care?
  - Are there any challenges where you work today in relation to these interactions?
    - Examples from own individual experiences preferred
    - From your own experiences and reflections – what are perspectives that would benefit from being improved?
      - How does this relate to your own professional fulfillment/satisfaction?
      - How does this relate to quality of patient care?
      - Is it measured per today? How would you go about to measure this?
- Which of the targets and measurements that your department follow are you aware of?
  - Are any of these really important for you/ that you actively track and follow?
  - Are there other measurements you would appreciate to follow?
- Do you experience that the organization is supportive and facilitates for you to come up with suggestions for improvements?
  - When was the last time you had an idea/suggestion for improvement? (concrete example)
    - How did you go about to get support and initiate change based upon your idea/suggestion?
    - Has your idea/suggestion become reality?
  - From your own experience, what can be done, if anything, to further facilitate for new ideas to improve clinical practice?
- If you were the Head of the Department or Hospital Director are there things you would really want to pay additional attention to?
- Are there other questions you would have wanted us to ask, in relation to this research area?

**Much appreciate your time and effort in participating!**

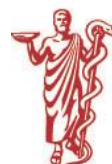

**LEFO**

Institute for Studies of  
the Medical Profession



## Standards for reporting Qualitative Research (SRQR \*)

| No.                       | Topic                                                                                        | Item found at page     |
|---------------------------|----------------------------------------------------------------------------------------------|------------------------|
| <b>Title and Abstract</b> |                                                                                              |                        |
| S1                        | Title                                                                                        | 1                      |
| S2                        | Abstract                                                                                     | 1                      |
| <b>Introduction</b>       |                                                                                              |                        |
| S3                        | Problem formulation                                                                          | 2                      |
| S4                        | Purpose or research question                                                                 | 3                      |
| <b>Methods</b>            |                                                                                              |                        |
| S5                        | Qualitative approach and research paradigm                                                   | 3                      |
| S6                        | Researcher characteristics and reflexivity                                                   | 5                      |
| S7                        | Context                                                                                      | 4                      |
| S8                        | Sampling strategy                                                                            | 5                      |
| S9                        | Ethical issues pertaining to human subjects                                                  | 5                      |
| S10                       | Data collection methods                                                                      | 5                      |
| S11                       | Data collection instruments and technologies                                                 | 5                      |
| S12                       | Units of study                                                                               | 5                      |
| S13                       | Data processing                                                                              | 5                      |
| S14                       | Data analysis                                                                                | 5                      |
| S15                       | Technique to enhance trustworthiness                                                         | 3, 5, 11               |
| <b>Results/Findings</b>   |                                                                                              |                        |
| S16                       | Synthesis and interpretation                                                                 | 6,7,8,9,10             |
| S17                       | Links to empirical data                                                                      | 6,7,8,9,10             |
| <b>Discussion</b>         |                                                                                              |                        |
| S18                       | Integration with prior work, implications, transferability, and contribution(s) to the field | 11, 12, 13, 14, 15, 16 |
| S19                       | Limitations                                                                                  | 10                     |
| <b>Other</b>              |                                                                                              |                        |
| S20                       | Conflicts of interest                                                                        | 17                     |
| S21                       | Funding                                                                                      | 17                     |

\* **Standards for Reporting Qualitative Research: A Synthesis of Recommendations.**

O'Brien, Bridget; Harris, Ilene; Beckman, Thomas; Reed, Darcy; MD, MPH; Cook, David; MD, MHP

Academic Medicine. 89(9):1245-1251, September 2014.

DOI: 10.1097/ACM.0000000000000388

1  
2  
3  
4  
5  
6  
7  
8  
9  
10  
11  
12  
13  
14  
15  
16  
17  
18  
19  
20  
21  
22  
23  
24  
25  
26  
27  
28  
29  
30  
31  
32  
33  
34  
35  
36  
37  
38  
39  
40  
41  
42  
43  
44  
45  
46  
47  
48  
49  
50  
51  
52  
53  
54  
55  
56  
57  
58  
59  
60

For peer review only

'E

# BMJ Open

## How do hospital doctors experience the interactions between professional fulfillment, organization and quality of care? A qualitative study in an emergency hospital in Norway

|                                 |                                                                                                                                                                                                                                                                                                                                |
|---------------------------------|--------------------------------------------------------------------------------------------------------------------------------------------------------------------------------------------------------------------------------------------------------------------------------------------------------------------------------|
| Journal:                        | <i>BMJ Open</i>                                                                                                                                                                                                                                                                                                                |
| Manuscript ID                   | bmjopen-2018-026971.R1                                                                                                                                                                                                                                                                                                         |
| Article Type:                   | Research                                                                                                                                                                                                                                                                                                                       |
| Date Submitted by the Author:   | 17-Jan-2019                                                                                                                                                                                                                                                                                                                    |
| Complete List of Authors:       | Bååthe, Fredrik; LEFO - Institute for studies of the medical profession; Institutet for stressmedicin, Rosta, Judith; LEFO - Institute for studies of the medical profession<br>Bringedal, Berit ; LEFO - Institute for studies of the medical profession<br>Rø, Karin; LEFO - Institute for studies of the medical profession |
| <b>Primary Subject Heading</b>: | Qualitative research                                                                                                                                                                                                                                                                                                           |
| Secondary Subject Heading:      | Health services research, Medical management, Health policy, Evidence based practice, Communication                                                                                                                                                                                                                            |
| Keywords:                       | HEALTH SERVICES ADMINISTRATION & MANAGEMENT, EDUCATION & TRAINING (see Medical Education & Training), ETHICS (see Medical Ethics), PREVENTIVE MEDICINE, QUALITATIVE RESEARCH                                                                                                                                                   |
|                                 |                                                                                                                                                                                                                                                                                                                                |

SCHOLARONE™  
Manuscripts

1  
2  
3 **How do hospital doctors experience the interactions between professional fulfillment,**  
4 **organization and quality of care? A qualitative study in an emergency hospital in Norway**  
5  
6  
7  
8

---

9 Authors: Fredrik Bååthe, Judith Rosta, Berit Bringedal, Karin Isaksson Rø

10  
11 Corresponding author: Fredrik Bååthe, Beckasinvägen 2, 42933 Kullavik, Sweden,  
12 fredrik.baathe@vgregion.se, +46736601710  
13  
14

15 Fredrik Bååthe,  
16 LEFO -Institute for Studies of the Medical Profession, LEFO, Oslo, Norway;  
17 Sahlgrenska Academy at Gothenburg University, Sweden;  
18 Sahlgrenska University Hospital, Gothenburg, Sweden;  
19 Institute of Stressmedicin, Region Västra Götaland, Sweden  
20

21 Judith Rosta  
22 LEFO - Institute for Studies of the Medical Profession, Oslo, Norway  
23  
24

25 Berit Bringedal  
26 LEFO - Institute for Studies of the Medical Profession, Oslo, Norway  
27  
28

29 Karin Isaksson Rø,  
30 LEFO - Institute for Studies of the Medical Profession, Oslo, Norway;  
31 Dept. of Behavioural Sciences in Medicine, Institute of Basic Medical Sciences, Medical Faculty,  
32 University of Oslo  
33

34 Keywords: Physician, professional fulfillment, satisfaction, patient-quality, organization  
35

36 7543 words  
37  
38  
39  
40  
41  
42  
43  
44  
45  
46  
47  
48  
49  
50  
51  
52  
53  
54  
55  
56  
57  
58  
59  
60

## Abstract

**Objectives:** Doctors increasingly experience high levels of burnout and loss of engagement. To address this there is a need to better understand how doctors' professional fulfillment is related to organizational factors and quality of patient care. This study explores how doctors experience the interaction among professional fulfillment, organizational factors and quality of patient care.

**Design:** An explorative and qualitative design with semi-structured individual interviews. Interviews were transcribed verbatim and analyzed by a transdisciplinary research group.

**Setting:** Mid-sized emergency hospital in Norway

**Participants:** A purposeful sampling was used. Gender and seniority were used as selection criteria. Seven doctors were interviewed. Three senior doctors (two female, one male) and four in training (three male, one female).

**Results:** We found that in order to provide quality care to the patients, individual doctors describe stretching themselves to overcome organizational shortcomings. Experiencing a workplace emphasis on production numbers and budget concerns led to feelings of estrangement among doctors. Doctors reported a shift from serving as trustworthy, autonomous professionals to becoming production workers, where professional identity was threatened. They felt less aligned with workplace values, in addition to experiencing limited management recognition for good-quality patient work. Management initiatives to include doctors in local development work was sparse. .

**Conclusion:** Doctors in clinical practice have first-hand information as to what and how things should be done in order to improve the quality of care. Collaboration between management and doctors should have high priority. In order to improve both quality of care and professional fulfillment doctors should be included in all local initiatives to further develop clinical care.

### Strength and limitations of this study

This study has a potential limitation in that the empirical material was based on interviews with seven doctors, however, given our priority to capture in-depth, nuanced aspects, individual interviews were given priority over the higher number resulting from group interviews.

It is a strength having an interdisciplinary research group conduct the analytical work.

Another strength is that the qualitative research process facilitated close attention to the individual doctor experience, while simultaneously analytically striving to find an empirically grounded collective doctors' voice.

This study focused one clinical setting and transferability to other settings might be challenging.

However based on previous research showing communality among doctors across different contexts in the western world we humbly suggest other settings could benefit from the findings in this study.

## Introduction

High-quality health care depends not only on high-tech equipment, sufficient resources and reliable evidence, but also on health professionals who are engaged and find meaning with their work. Researchers have recently argued for expanding the traditional health care improvement goals. In addition to enhancing patient treatment, securing the population's health and reducing the per capita cost of health care <sup>1</sup>, they argue for promoting professional fulfillment<sup>2-4</sup>. Bodenheimer and Sinsky expressed this succinctly as, "care of the patient requires care of the provider" <sup>5</sup>.

In order to improve quality of care, while containing costs, and promoting professional fulfillment we seem to need additional knowledge. A review from 2013 found that 70% of interventions aiming to improve quality and reduce health care costs did not succeed in doing both<sup>6</sup>. Common strategies were hospital or department mergers and downsizing, without attaining increased quality<sup>7</sup> and leading to negative effects for work environment and increased stress, burnout and feelings of alienation among employees <sup>8-10</sup>.

Several studies have explored links between professional fulfilment and different measures of quality of care (both as perceived by doctors themselves or more objectively measured in relation to treatment outcomes or patient complaints) <sup>11-15</sup>. Other studies have explored the relationships between different organizational factors and how they influence professional behavior, motivation, engagement and satisfaction<sup>16-22</sup>. Only a few studies have reported links between all three dimensions - organizational change, quality of care and professional fulfillment <sup>23-25</sup>. Although these studies indicate the importance of doctors' active involvement in change processes research informs us that such engagement is limited<sup>26-29</sup>. We need to understand more about these relationships. This was echoed by a group of 32

1  
2  
3 experts in the study of burnout among health professionals who suggested that, to better  
4 care for providers, a better understanding of the links among professional fulfillment,  
5 quality of care and organizational factors is needed<sup>30</sup>. There seems to be a call for research  
6 to provide more practice-informed and actionable knowledge to facilitate research-based  
7 interventions in developing the local workplace<sup>31</sup>.

8  
9  
10  
11  
12  
13  
14  
15  
16 In Norway, as in other countries, recent decades have seen a stronger emphasis on budget  
17 control and value for money. A number of reforms are implemented, all with the intention  
18 to improve quality, reduce waste, and lead to better priorities. The many reforms and  
19 increased focus on budget constraints seem to have led to some skepticism among  
20 doctors<sup>32</sup>. Norwegian doctors have expressed their worries about maintaining the quality of  
21 care through the many reforms and changes<sup>33</sup>

22  
23  
24  
25  
26  
27  
28  
29  
30  
31 The Norwegian health care system is a single payer, universal coverage system, funded by  
32 the State. Hospital care is organized as regional trusts with independent boards. Yearly  
33 contracts are made with the Ministry of Health. Primary care is organized as private  
34 businesses and GPs are gatekeepers to specialist care.

35  
36  
37  
38  
39  
40  
41  
42 Although doctors in Norway<sup>34</sup> (as in other Western countries<sup>35</sup>) have high scores on work  
43 satisfaction, there is a clear difference between specialties. Community doctors and general  
44 practitioners scored highest and doctors in surgical disciplines lowest<sup>34</sup>. Qualitative  
45 interviews of hospital doctors have found that surgeons, as one of three specialties,  
46 experience conflicts between adhering to their views of what a good doctor is/does and the  
47 consequences this has for the interaction with healthcare leaders, their colleagues and for  
48 the balance between work and home<sup>36</sup>. In 2008 more than 30% of senior and 18% of junior  
49 hospital doctors reported working under "unacceptably" high rates of stress fairly often or  
50  
51  
52  
53  
54  
55  
56  
57  
58  
59  
60



1  
2  
3 often and over 75% of hospital doctors reported fairly or very high stress related to frequent  
4  
5 reorganizations<sup>37</sup>.  
6  
7

8  
9 Thus, exploring how Norwegian doctors understand the relationships among organizational  
10  
11 factors, professional fulfillment and quality of care will inform and support commensurate  
12  
13 interventions toward improving doctors' well-being and thus the quality of patient care<sup>38</sup>.  
14  
15

### 16 **Aim**

17  
18  
19 The study aims to explore how doctors experience the interactions among professional  
20  
21 fulfillment, organizational factors and quality of patient care.  
22  
23  
24

### 25 **Methods**

#### 26 **Design**

27  
28  
29 An explorative and qualitative design was chosen in this study. Such a design is appropriate  
30  
31 when there is limited knowledge about the focus for the study<sup>39</sup>. The study was conducted  
32  
33 as the first part of a multi-year interactive research project working in close collaboration  
34  
35 with clinicians at two hospitals in Norway and one in the USA. Interactive research promotes  
36  
37 learning among both the practitioners and the researchers and strives to have local  
38  
39 clinicians over time take responsibility for engaging in developing their own workplace<sup>40</sup>.  
40  
41 Interactive research includes repeated interaction between researchers and participants.  
42  
43 The larger research project is interviewing doctors from multiple sites and countries,  
44  
45 however this article focus the first set of doctor interviews in this iterative process<sup>41</sup>.  
46  
47  
48  
49  
50  
51  
52  
53

#### 54 **Setting**

55  
56  
57 A mid-sized emergency hospital in Norway providing medical, surgical and psychiatric care  
58  
59 with approximately 1,400 employees who serve a population of about 135,000. It is also a  
60

1  
2  
3 teaching hospital for doctors and nurses. The hospital has during the last years rearranged  
4 the executive leaders and engaged in a hospital wide leadership development program to  
5 create alignment with how new societal requirements are integrated and to facilitate  
6 improvements to managerial processes and processes impacting quality of patient care.  
7  
8  
9  
10  
11

12  
13 Following a presentation about the study to the hospital management, the researchers  
14 received approval to approach department managers. The study's aim and interactive study  
15 concept were presented to the group of doctors and head of the department. Following an  
16 internal discussion, one clinical department agreed to participate. Both doctors and the  
17 leader of the surgical department expressed appreciation of the cooperative aspects of the  
18 study and the explicit intent to listen to doctors' voices about their local situation.  
19  
20  
21  
22  
23  
24  
25  
26  
27  
28

### 29 ***Participants***

30  
31 For the most effective use of limited resources we used a purposeful sampling, which is a  
32 widely used technique for identification and selection of information rich cases<sup>39</sup>. Gender  
33 and seniority was used as selection criteria's to provide maximum variation<sup>42</sup> in order to get  
34 a rich empirical material. The number of doctors was related to a request from the  
35 department to minimize time conflict with clinical work without compromising the quality of  
36 the study. Based on experience from the research field and from interviewing doctors in  
37 other hospital settings we agreed on a minimum number of seven doctors. This is about a  
38 third of all doctors at the department. Three interviewees were senior doctors (two female,  
39 one male) and four were in training (three male, one female); the department head was a  
40 senior, male doctor.  
41  
42  
43  
44  
45  
46  
47  
48  
49  
50  
51  
52  
53  
54  
55  
56  
57  
58  
59  
60

## Data Collection

Interviewing is a way to gather rich information, in an effort to see the world as it is seen by the interviewees and to strive to develop meaning from their personal experiences<sup>42</sup>. A semi-structured interview guide with open-ended-questions was constructed to facilitate consistency between interviews<sup>39</sup>. Simultaneously, open-ended questions allowed the interviewer to delve further into topics that arose during the interview process. All interviews were done in the local language. (A translated interview guide is available in Appendix 1.)

In order to guide and focus the interviews a conceptual framework was developed based upon relevant literature<sup>43</sup>. Each doctor also received a written and oral summary of the study before the interview started and before signing the written consent.

[Figure 1 here]

### **Figure 1.** Conceptual framework used in the interview situation

Individual doctor interviews were conducted in November and December 2016. Interviews took place in a conference facility in the hospital area and were digitally recorded. Each interview was scheduled to last 60 minutes. The researchers allowed participants to use more time in order to provide maximum information richness from the limited numbers of interviews. This resulted in an average interview time of 74 minutes.

In order to provide maximum information power from a small number of participants<sup>44</sup> we were two experienced researchers with complementary experience participating in every interview, but one. During the interview one researcher was leading while the other listened and took extensive notes, occasionally interacting to further probe interesting aspects relating to the study aim. Both researchers (PhD) had solid experience with physician

1  
2  
3 interviews and knew the research field well. One interviewer has a background as an  
4  
5 occupational physician and many years of experience counseling doctors both individually  
6  
7 and in groups. The other interviewer has a professional background as department head at  
8  
9 a university hospital, educational background from industrial engineering and management  
10  
11 and consultant level training in group relations theory.  
12  
13  
14

### 15 16 **Analysis**

17  
18  
19 To provide for a multifaceted interpretation of the empirical material, the analytical process  
20  
21 involved a team of four researchers with complimentary experiences. In addition to those  
22  
23 two who conducted the interviews, a senior researcher (PhD) with experience in  
24  
25 epidemiology and with professional background in surgical nursing took part, as well as a  
26  
27 senior health care researcher with a PhD in sociology.  
28  
29  
30

31  
32  
33 The analytical process started with a tentative analysis to capture the main content from the  
34  
35 interviews. The two interviewers went through their notes and impressions from the actual  
36  
37 interviews and started to create an overarching understanding. The PhD with a nursing  
38  
39 background listened to all audio recordings and made notes with the targeted task to ask  
40  
41 the material two key questions: What is the most pressing problem? What do they do to  
42  
43 handle/solve this problem? The PhD in Sociology listened to most of the interviews and  
44  
45 made notes about her first impression. The research group then met and compared initial  
46  
47 notes. This first step provided an overall perspective that was presented back to the  
48  
49 department to allow them to react to it. The material provided good resonance with the  
50  
51 interviewees, the other doctors present in the meeting and the head of the department.  
52  
53  
54  
55  
56  
57  
58  
59  
60

1  
2  
3 The more developed analytical process was guided by Miles and Huberman<sup>45</sup> and was done  
4  
5 without specific analytical software. All interviews were transcribed verbatim in the local  
6  
7 language. Based on the study aim, the interviews were read individually to capture words  
8  
9 and sentences, meaning units, which showed similarities in terms of content. These  
10  
11 meaning units were condensed and labeled with a descriptive code close to the textual  
12  
13 meaning. Sometimes these codes were in English and sometimes they were in the local  
14  
15 language. The research group met and each person presented their descriptive coding.  
16  
17  
18 Mostly there was congruence. When congruence was not experienced between the notes,  
19  
20 face to face conversations were carried out to challenge each other's perspective.  
21  
22  
23 Sometimes these conversations went back to the original text to find a common ground and  
24  
25 interpretation, before moving on. The researchers then worked to group the descriptive  
26  
27 codes, and related meaning units, based on the ones having similar content. Each grouping  
28  
29 received a tentative descriptive header. Once this was in place two alternative routes of  
30  
31 further sorting and abstraction were followed in a comprehensive analysis of the content.  
32  
33  
34 One was to use the conceptual framework from the interview (Fig 1) and organize the  
35  
36 different grouping in relation to if it concerned professional fulfillment, organizational  
37  
38 factors or quality of patient care. This process created, at first, an experience of structure  
39  
40 and cleanliness, but over time provided a blurred result, with a residual of empirical  
41  
42 material that fitted in any or all of the three aspects. The other analytical route was to look  
43  
44 for groups that could be combined with only slightly broadening or altering the content, as  
45  
46 symbolized by an adjustment of the descriptive header. This iterative process eventually  
47  
48 contributed to form five empirical themes that integrated all interview material into a  
49  
50 comprehensive understanding. Quotations are used in the result to allow individual doctor  
51  
52 voices to illustrate a central content. Doctors are given a random number for identification.  
53  
54  
55  
56  
57  
58  
59  
60

1  
2  
3 The interdisciplinary group of authors worked both individually and in group to enrich the  
4 empirical interpretations and reduce the risk of any author overpowering the empirical  
5 material of doctors' voices. During the analytical process we paid extra attention if we found  
6 data that did not fit with the other data, indicating there was some empirical nuances we  
7 were missing with our small sample of seven doctors. This did not happen. Regardless of  
8 gender or seniority there was a high degree of commonality between the different doctor  
9 voices relating to the aim. During the analysis it became clear that the seven information  
10 rich cases enabled a comprehensive understanding. It confirms, what Malterud<sup>44</sup> suggests,  
11 that a limited number of information rich interviews can contribute with new meaningful  
12 knowledge. During the analytical process alternative interpretations were continuously  
13 sought through critical reflections and ongoing conversations during face-to-face meetings.  
14 This process continued iteratively until alternative understandings and considerations were  
15 reconciled into a coherent result. Patton suggests that this type of research group  
16 triangulation is a way to reach comprehensive, robust and well-developed findings from a  
17 rich empirical material <sup>39</sup>.

### 40 ***Ethics***

41  
42 This study followed the World Medical Association's Declaration of Helsinki <sup>46</sup>. The risk of  
43 harm to the interviewed doctors was very low, and thus the project did not meet the criteria  
44 justifying a formal application to the ethics board, consistent with Norwegian law <sup>47</sup>.

### 50 ***Patient and Public Involvement***

51 No patients were involved in this study  
52  
53  
54  
55  
56  
57  
58  
59  
60

## Results

Analyzing the interviewed doctors' experiences about the interactions between professional fulfillment, organizational factors and quality of care, resulted in an empirically grounded understanding with the following themes. (Quotes from doctors are used to provide the original voice. Each doctor is assigned a random letter for anonymity.)

### ***Quality of care crowded out by production numbers and economic data***

Many doctors talked about how conversations at department meetings had changed. Previously, they were more about quality of clinical care, while now they mostly focused on the need to meet production targets and finding ways to handle budgetary constraints. Interviewed doctors expressed how quality was starting to be experienced as an empty phrase, crowded out by production numbers and economic concerns.

*Quality is more and more becoming an empty term in relation to what the hospital values are. What we hear about is mostly money issues and production numbers. (Doctor A)*

Changes in these workplace conversations, combined with an experience of limited recognition for good professional work, made some doctors express that they did not really "recognize the workplace". Some of them also expressed concerns about who they were becoming, in their role as doctors. One doctor experienced a change from being a trustworthy and autonomous professional, to becoming more of a production worker.

*I don't feel that I come to work as a capable and autonomous resource anymore. I feel I come to work only to produce a certain number of procedures. (Doctor B)*

1  
2  
3 While the interviewed doctors all appreciated swift and smooth operations, a new operating  
4 concept, with the explicit aim to increase output, troubled some. They expressed concerns  
5 about potential risks of patient complications since the allotted time was too limited to find  
6 anatomical landmarks and stop minor bleeding before proceeding to the next surgical step.  
7  
8 With a dominating focus on quantity, there was an emergent worry whether individual  
9  
10  
11  
12  
13  
14  
15  
16  
17  
18  
19  
20  
21  
22  
23  
24  
25  
26  
27  
28  
29  
30  
31  
32  
33  
34  
35  
36  
37  
38  
39  
40  
41  
42  
43  
44  
45  
46  
47  
48  
49  
50  
51  
52  
53  
54  
55  
56  
57  
58  
59  
60

While the interviewed doctors all appreciated swift and smooth operations, a new operating concept, with the explicit aim to increase output, troubled some. They expressed concerns about potential risks of patient complications since the allotted time was too limited to find anatomical landmarks and stop minor bleeding before proceeding to the next surgical step. With a dominating focus on quantity, there was an emergent worry whether individual quality standards were compromised.

*Maybe the key dilemma is that you are pushed for quantity all the time. It leads you to start to feel, right after you go home from your on-call work, that you did not finish your task or finalize things the way you wanted to. You get pushed to increase quantity and it is impacting your own reference of good-quality work. (Doctor C)*

While doctors expressed unease about conversations focusing more on cost and production than quality, there was also an awareness of the necessity of high productivity and cost control.

*I am one of those doctors who consider that health care has an obligation to make sure we manage our resources and household with our tax-based money. (Doctor D)*

### ***Stretching oneself to deliver quality of care despite organizational shortcomings***

The participants emphasized the importance of delivering good quality care, even if it meant stretching themselves to overcome hindering organizational factors. This way of ensuring quality care was considered common practice. However, several doctors had begun to



1  
2  
3 wonder whether the individual work-arounds to handle organizational shortcomings could  
4  
5 have negative consequences for the quality of patient care.  
6  
7

8  
9 *One starts to wonder if this constant stretching of oneself can have*  
10  
11 *negative consequences. Like more patients expressing worries after their*  
12  
13 *operations. (Doctor E)*  
14  
15

16  
17 One of the more common organizational frustrations concerned unforeseen variations in  
18  
19 the daily operating schedule. This could result in long work hours for the doctors and  
20  
21 negatively impact family life. Another struggle with work–home balance concerned a so-  
22  
23 called “contract of conscience”. This was not a formal contract, but rather related to their  
24  
25 professional identity as doctors. The “contract” was driving them to further stretch  
26  
27 themselves and spend considerable time at work, on top of normal duties.  
28  
29  
30

31  
32 *I have to be there until the operation is finished. I am really concerned*  
33  
34 *whether I will be in time for kindergarten. It generates a lot of frustration,*  
35  
36 *but I have an implicit contract with the patient and also to the hospital to*  
37  
38 *make sure the operation is carried through. (Doctor E)*  
39  
40  
41

### 42 ***The accelerating struggle against time impacting well-being and quality of care***

43  
44  
45  
46 The struggle against time was a main concern in the interviews and the participants  
47  
48 experienced that it influenced their overall well-being.  
49

50  
51 *Suddenly you have one of these time and task collisions and it increases*  
52  
53 *work strain and stress, impacting physical and mental health. You know,*  
54  
55 *when you are expected to be in three places at once, it sort of triggers your*  
56  
57 *stress level. (Doctor C)*  
58  
59  
60

1  
2  
3 The participants felt uncomfortable with an increasing number of time and task collisions  
4  
5 and expressed concerns that this constant battle against time could jeopardize the quality of  
6  
7 care.  
8  
9

10  
11 *There is a constant battle against time. We need time to make solid*  
12  
13 *evaluations before and after operations. We are pushing the limits*  
14  
15 *towards feeling uncomfortable. Definitely relating to quality of care.*  
16  
17  
18 *(Doctor A)*  
19  
20

21  
22 There were also experiences of stress in the operating room, a work place sanctuary where  
23  
24 surgeons previously experienced that time was allowed to “stand still”.  
25  
26

27  
28 *Over the last years, operating programs have expanded. It is not seldom*  
29  
30 *that we push really hard to get through the program. As we realize we are*  
31  
32 *not making it, you feel how stress is building up also in the operating room.*  
33  
34  
35 *(Doctor A)*  
36  
37

### 38 **Quality of care as the basis for professional fulfillment**

39

40  
41 The participants expressed that quality of care was foundational for their experience of  
42  
43 professional fulfillment. Some of the doctors emphasized how the two were mutually  
44  
45 reinforcing.  
46  
47

48  
49 *Vital for job satisfaction is that we have an experience that things go well*  
50  
51 *with our patients. (Doctor A)*  
52  
53

54  
55 The importance of continuity between the individual patient and the individual physician  
56  
57 was also brought up as a central aspect of providing good care.  
58  
59  
60

1  
2  
3 *What gives me satisfaction is when I greet my patients, operate on them*  
4  
5 *and follow up afterwards, so the patient is satisfied. That is all I wish for.*

6  
7  
8 *(Doctor B)*  
9

10  
11 Satisfied patients gave doctors a sense of accomplishment. A consequence was that patient  
12  
13 error negatively impacted the individual doctor.  
14

15  
16  
17 *A downside of being a surgeon is complications, it sort of comes with the*  
18  
19 *job. I had a severe surgical complication last week and this is darkening*  
20  
21 *everything, it impacted me fundamentally for many days. (Doctor G)*  
22  
23

24  
25 ***Management not recognizing quality of care challenges and provide limited support for***  
26  
27 ***doctor initiatives***  
28

29  
30 The interviewed doctors experienced how the managerial focus on increasing volumes  
31  
32 conveyed an implicit assumption that more output, of the same quality, could be created by  
33  
34 simply increasing the speed. This way of communicating about how to increase surgical  
35  
36 volumes created a strong dissonance with the everyday challenges experienced in the clinic.  
37  
38

39  
40  
41 *Everyone expects that treatments are first class. We only measure waiting*  
42  
43 *times and epicrisis times and similar unimportant things. Everybody*  
44  
45 *expects treatments to be the same and quality to be the same, no matter*  
46  
47 *what. That is not true! (Doctor F)*  
48  
49

50  
51 A number of different individual initiatives to improve quality and facilitate every day work  
52  
53 had been initiated. One doctor described saving time and increasing quality and safety by  
54  
55 making standard patient record templates for different operational procedures. Another  
56  
57  
58  
59  
60

1  
2  
3 doctor worked to schedule ward rounds to make them visible, instead of being something  
4  
5 that the doctors were supposed to “squeeze in” between other scheduled tasks.  
6  
7

8  
9 *We are measured on the number of operations we perform and on the*  
10  
11 *number of patients we see in the outpatient clinic. But we are not*  
12  
13 *measured on the time we spend on ward rounds. Talking with the doctor is*  
14  
15 *a major part of what patients appreciate when measuring patient*  
16  
17 *satisfaction. Now, ward rounds are scheduled. (Doctor G)*  
18  
19  
20

21  
22 The participants expressed a sense of disappointment, and surprise, that the organization  
23  
24 neither seemed to appreciate the individual initiatives, nor provide a structure to go from  
25  
26 the individual benefit towards benefitting the group of doctors. While many of the doctors  
27  
28 had limited or no suggestions about what management ought to do differently, some  
29  
30 suggested that the traditional hierarchical way of managing needs to be modernized.  
31  
32

33  
34  
35 *I think this is about hospital management still struggling to find a more*  
36  
37 *modern form. I find that teamwork is something that private enterprises*  
38  
39 *have focused on for a long time. But the old way of leading is still what*  
40  
41 *goes on in hospitals. With traditional hierarchies and top-down decisions.*  
42  
43  
44 *(Doctor A)*  
45  
46

47  
48 Several doctors experienced that management did not do enough to facilitate for doctors to  
49  
50 participate in clinical development work. There were also some who clearly articulated the  
51  
52 need for a major overhaul of the existing hospital culture, towards a situation where  
53  
54 involvement from different employee groups was considered the norm.  
55  
56  
57  
58  
59  
60

1  
2  
3 *If you are working with changes in such a fine-tuned and complex*  
4 *environment as a hospital, one must involve those impacted by a change.*  
5  
6 *You put small groups of surgeons and op-nurses together. Provide them*  
7 *some time to work on specific issues. Listen attentively to what they say*  
8 *about key pressure points and act accordingly. Not simply pushing*  
9 *decisions down at people! (Doctor A)*  
10  
11  
12  
13  
14  
15  
16  
17  
18  
19  
20  
21

## 22 **Discussion**

23  
24  
25 Quality of care is a key outcome for any healthcare enterprise. One might consider that  
26  
27 statement as self-evident. In particular when working as a doctor in a hospital that is part of  
28  
29 the societal infrastructure in Norway, a well-functioning and affluent Nordic country.  
30

31  
32  
33 Nevertheless, our interviewed doctors conveyed that the essence of being a professionally  
34  
35 fulfilled doctor, creating high quality care for patients, no longer receives sufficient  
36  
37 recognition. Instead their experience is that leaders at different levels have their focus on  
38  
39 handling more patients, referred to as “increasing production volumes”, in order to address  
40  
41 a situation with never ending budget constraints. In short, the doctors claim that  
42  
43 conversations about quality of care, addressing the essence of what is considered  
44  
45 meaningful to doctors, have been replaced with conversations about production volumes  
46  
47 and budget numbers.  
48  
49  
50

51  
52  
53 Before engaging further in discussing our results it might be prudent to remind ourselves  
54  
55 that the amount of money available to spend on healthcare is limited. This restriction might  
56  
57  
58  
59  
60

1  
2  
3 be even clearer in a tax-financed healthcare systems, like the Norwegian. There is thus a  
4  
5 built in tension that requires a balancing of clinical needs with budgetary means.  
6  
7

8  
9 Our interviewed doctors expressed how conversations about **quality of care were crowded**  
10  
11 **out by conversations that focused production numbers and economic data.** This emphasis  
12  
13 on production volumes and budget numbers led to an experience of estrangement. This  
14  
15 finding confirms previous observations from other researchers grappling with decreasing job  
16  
17 satisfaction and increasing rates of physician burnout. Some research suggest that changes  
18  
19 in what society, patients and employers are expecting from a doctor is starting to create a  
20  
21 job situation that is no longer what doctors expected<sup>48</sup>, and suggests that clinical leaders  
22  
23 have a crucial role in helping to establish a revised psychological agreement what it means  
24  
25 to be a doctor. That is a major change process impacting the professional identity of being  
26  
27 and becoming a doctor <sup>10 49 50</sup>. Gunderman asks if Doctors have Joined the Working Class,  
28  
29 and frames the challenge as “the frequency with which physicians smile and express  
30  
31 fulfillment and pride in their work”, <sup>51</sup>. Epstein and Privitera suggest in their text about doing  
32  
33 something about burnout ; “Doctors, disillusioned by the productivity orientation of  
34  
35 administrators and absence of affirmation for the values and relationships that sustain their  
36  
37 sense of purpose, need enlightened leaders who recognize that medicine is a human  
38  
39 endeavor and not an assembly line” <sup>52</sup>.  
40  
41  
42  
43  
44  
45  
46  
47

48 The strive towards meaning has been expressed as an innate human quest<sup>53</sup>. Meaning at  
49  
50 work has often been found in moments when work mattered more to others than to  
51  
52 themselves, and when individuals experienced that work was bridging the gap between the  
53  
54 personal realm and the work domain<sup>54</sup>. The dominating reasons for experiencing  
55  
56 meaninglessness at work was "the tension between an organizational focus on the bottom  
57  
58  
59  
60

1  
2  
3 line and the individual's focus on the quality of professionalism of work" and managerial  
4  
5 lack of recognition for hard work<sup>54</sup>. Thus, paradoxically, the interviewed doctors seem to  
6  
7  
8 experience organizational factors that are evidence-based to increase a sense of  
9  
10  
11  
12  
13  
14  
15  
16  
17  
18  
19  
20  
21  
22  
23  
24  
25  
26  
27  
28  
29  
30  
31  
32  
33  
34  
35  
36  
37  
38  
39  
40  
41  
42  
43  
44  
45  
46  
47  
48  
49  
50  
51  
52  
53  
54  
55  
56  
57  
58  
59  
60

Faced with an accelerating struggle against time, the interviewed doctors described  
**stretching themselves to deliver quality care despite organizational shortcomings.**

Morrison and Smith described physician experiences with running faster but not getting  
anywhere and coined the term "hamster wheel health care"<sup>55</sup>. The experience of having  
less time and more work resonates across many physician well-being and burnout studies<sup>25</sup>  
<sup>56-58</sup>. However, what the participants in our study make evident is how a tradition among  
doctors to find individual workarounds in order to handle organizational issues, is no longer  
experienced as sustainable. Our participants inform us how they have started to consider  
how care quality, and their own wellbeing, could suffer from this way of working. The  
interviewed doctors indicate that their "plasticity" is over-stretched, and there is an implicit  
fear of things starting to fall apart. It is notable how some of the interviewed doctors  
questioned whether the tradition of "doing heroic individual deeds" to handle the situation  
at hand, could over time contribute to negative consequences on the quality of patient care.

While limited time with patients was the primal concern, work-home balance was also  
brought up as an issue that troubled many of the interviewed doctors. Swedish medical  
students and young doctors considered the balance between work, family and leisure time  
to be more important than salary level or career<sup>59</sup>. This was similar to younger Norwegian  
doctors, who spoke about the necessity to see their work as "a job" in contrast to thinking  
about it as "a lifestyle"<sup>60</sup>. This view resonates with "downshifting", a societal change

1  
2  
3 defined by some researchers as an endorsement of the question, “In the last ten years, have  
4 you voluntarily made a long-term change in your lifestyle, other than planned retirement,  
5 which has resulted in you earning less money?” More time with family was the most  
6 important reason for downshifting, followed by the desire to gain more control and  
7 personal fulfillment <sup>61</sup>.

8  
9  
10  
11  
12  
13  
14  
15  
16 *That quality of care is foundational for professional fulfillment* has been found in many  
17 previous studies <sup>57 62 63</sup> and can be understood in light of the long-standing development of  
18 the physician’s identity from Hippocrates to more modern medicine (e.g., Osler <sup>64</sup>)  
19 consistently focusing on patient well-being. While the professional identity of doctors has  
20 long hinged on delivering good patient care quality, more recently, the lack of physician  
21 well-being has been recognized as a potential threat to quality care<sup>3</sup>. Research has indicated  
22 that doctors who are experiencing high stress and strain, can negatively impact the quality  
23 and safety of patient care <sup>12 14 15</sup>. Some research even suggests that physician well-being  
24 might be a usable overall indicator of overall health care quality <sup>58</sup>. In the 2017 revision of  
25 the Declaration of Geneva, as adopted by the World Medical Association, this new research  
26 is reflected in the following addition: “I will attend to my own health, well-being and abilities  
27 in order to provide care of the highest standard” <sup>65</sup>.

28  
29  
30  
31  
32  
33  
34  
35  
36  
37  
38  
39  
40  
41  
42  
43  
44  
45  
46 Our study participants experienced a hierarchical management culture and management did  
47 ***not recognize quality of care challenges and provided limited support for doctor initiatives.***

48  
49  
50  
51 The respondents expressed frustrations with the limited possibility to participate in the local  
52 development work. At the same time there were few accounts of aspiration, or actual  
53 activity, with doctors actively working to find more permanent solutions to organizational  
54 shortcomings. Berwick and Nolan argue that development work and improving clinical  
55  
56  
57  
58  
59  
60



1  
2  
3 processes requires different skills than those considered traditional for a clinical physician  
4  
5 trained in the bio-medical sciences<sup>27</sup>. Although some interviewees in our study expressed  
6  
7 frustration with not being involved by management on issues where clinical experience  
8  
9 would have been valuable for good decision-making, doctors' engagement in development  
10  
11 work has been reported to be a challenge<sup>66-68</sup>. Previous research about physician  
12  
13 engagement found that physicians were found to be interested in developing processes and  
14  
15 practices in an abstract, general sense<sup>17</sup>. Whether a physician actively engaged was found to  
16  
17 depend on if previous similar activities had contributed or not towards the experience of  
18  
19 individual professional fulfilment<sup>18 26 29 66</sup>. Research has emphasized that a deliberate,  
20  
21 collaborative process at the local workplace is key to reducing physician burnout and  
22  
23 promoting engagement<sup>25 67</sup>. One study worked with a participatory change process in  
24  
25 which doctors analyzed work-related problems, created local solutions, which were then  
26  
27 implemented. Doctors' working conditions and patients' perceived quality of care both  
28  
29 showed positive changes<sup>24</sup>. Another study showed that doctors who were actively involved  
30  
31 in the process of changing the local ward round experienced better-informed clinical  
32  
33 decisions, had fewer follow-up questions from their patients and increased their own  
34  
35 professional fulfilment<sup>68</sup>.

36  
37 Taking doctors' engagement seriously contributes with important results. There is an  
38  
39 increasing body of knowledge about how local culture is recreated, or changed, in every and  
40  
41 all of the conversations that are going on between the different people working together<sup>69</sup>

42  
43  
44  
45  
46  
47  
48  
49  
50  
51  
52  
53  
54  
55  
56  
57  
58  
59  
60  
70.

### ***Strengths and Weaknesses of this study***

This paper presents the results of the first phase of a three-year interactive research project<sup>40</sup>. This first phase included a feedback session during which the researchers presented their initial findings from analyzing the interviews back to the group of doctors.

Both those who participated in interviews and those doctors who had not been interviewed, confirmed the researchers understanding of the local work situation. This is a study strength that substantiates the findings. It confirms, in line with Malterud<sup>44</sup>, that a limited number of information rich interviews can contribute with new meaningful knowledge.

Having an interdisciplinary research group with complimentary educational, research and work related experiences analyzing the interviews contributed to a multifaceted and nuanced understanding of the empirical information.

In this study we examine doctors' perceptions about their work situation, without observing their actual behaviour. A potential weakness concerns if the interviewed doctors described their actual reality. Previous research has found that what people present in interviews reflect their perceptions, and these perceptions also inform their actions<sup>42 71</sup>. By asking for clinical examples we also strove to ensure close proximity to the local situation.

While this study focused on a single surgical setting, we suggest that other health care settings can learn from this study. We base this notion of transferability on Larsson, who argued all usage of a piece of research a dynamic act, which is completed if, and only if, someone else can make better sense of their situation with the help of descriptions from research<sup>72</sup>. We further base this on research showing communality among doctors across different contexts<sup>73</sup>, by some researchers called one occupational community of practice<sup>74</sup>.

## Conclusions

Exploring how doctors experience the interactions among professional fulfillment, organizational factors and quality of patient care, we found that in order to provide quality care to the patients, individual doctors describe stretching themselves to overcome organizational shortcomings. However, to secure both quality of care and professional fulfillment for doctors, this strategy is no longer a viable single solution. It needs to be complemented by management strategies that facilitate individual doctors' engagement in the continuous work of improving clinical processes.

Doctors in clinical practice have first-hand information as to what and how things should be done in order to improve the quality of care. A major motivation for the doctors was to provide high quality care to their patients, thus, engagement in initiatives to improve clinical care can lead to more fulfilled doctors as well as better care. Collaboration between management and doctors should have high priority and doctors should be included in all local initiatives to reorganize and improve clinical care.

## Practice Implications

While the conclusions may sound surprisingly self-evident, it could be prudent to recall that this type of engagement in improvement work has neither been part of the traditional medical curricula nor of the professional identity as doctors. Engaging doctors in development work also challenges the core of many leadership practices

However, health care management has a central role and is responsible for ensuring time and planned forums for doctors to further engage in contributing to meaningful change.

### Future research

This study has provided knowledge about how doctors in Norway experience the interaction among professional fulfillment, organizational factors and quality of patient care. It points to a need to explore how the managerial side understands the interaction among professional fulfillment, organizational factors and quality of patient care, which is currently being done.

Interactive studies show positive effects from collecting doctors' experiences, analyzing the resulting interview material for commonalities and feeding it back in a consolidated and actionable form. This external and structured view helps doctors and managers identify important areas for local organizational change and facilitates the active involvement of doctors in the change process. There is a need for additional knowledge about interactive research.

### Contributorship

All four authors (FB, JR, BB, KIR) meet the conditions outlined in the ICMJE recommendations and have all contributed in all dimensions.

- Substantial contributions to the conception or design of the work, or the acquisition, analysis or interpretation of data.
- Drafting the work or revising it critically for important intellectual content.
- Final approval of the version published.

Agreement to be accountable for all aspects of the work in ensuring that questions related to the accuracy or integrity of any part of the work are appropriately investigated and resolved. There is no one who fulfills the criteria that has been excluded as an author.

### **Role of the Funding Source**

This work was supported by Den norske legeforeningens fond for kvalitetsforbedring og pasientsikkerhet (Norwegian Fund for Quality Improvements and Patient Safety) grant number 16 / 5234. We confirm researcher independence from the funders and that all authors had full access to all data in the study and can take responsibility for the integrity of the data, the accuracy of the data analysis, results and conclusions.

### **Conflicts of Interest**

No competing interests exist for any of the researchers involved in this article.

### **Transparency declaration**

The lead author affirms that this manuscript is an honest, accurate, and transparent account of the study being reported; that no important aspects of the study have been omitted; and that any discrepancies from the study as planned have been explained.

### **Data sharing Statement**

Interview transcript are the empirical source. These are only for the assigned research group in order to honor the commitment with interviewed doctors.

## References

1. Berwick D. Crossing the boundary: changing mental models in the service of improvement. *Int J Qual Health Care* 1998;**10**(5):435-41.
2. Sikka R, Morath JM, Leape L. The Quadruple Aim: care, health, cost and meaning in work. *BMJ Qual Saf* 2015:bmjqs-2015-004160.
3. West CP. Physician Well-Being: Expanding the Triple Aim. *J Gen Intern Med* 2016:1-2.
4. Trockel M, Bohman B, Lesure E, et al. A Brief Instrument to Assess Both Burnout and Professional Fulfillment in Physicians: Reliability and Validity, Including Correlation with Self-Reported Medical Errors, in a Sample of Resident and Practicing Physicians. *Acad Psychiatry* 2018;**42**(1):11-24.
5. Bodenheimer T, Sinsky C. From Triple to Quadruple Aim: Care of the Patient Requires Care of the Provider. *Ann Fam Med* 2014;**12**(6):573-76.
6. Hussey PS, Wertheimer S, Mehrotra A. The association between health care quality and cost: a systematic review. *Ann Intern Med* 2013;**158**(1):27-34.
7. Leatt P, Baker GR, Halverson PK, et al. Downsizing, reengineering, and restructuring: long-term implications for healthcare organizations. *Front Health Serv Manage* 1997;**13**(4):3.
8. Bourbonnais R, Brisson C, Malenfant R, et al. Health care restructuring, work environment, and health of nurses. *Am J Ind Med* 2005;**47**(1):54-64.
9. Nordang K, Hall-Lord M-L, Farup PG. Burnout in health-care professionals during reorganizations and downsizing. A cohort study in nurses. *BMC Nurs* 2010;**9**(1):8.
10. McKinlay JB, Marceau L. New Wine in an Old Bottle: Does Alienation Provide an Explanation of the Origins of Physician Discontent? *Int J Health Serv* 2011;**41**(2):301-35.
11. Firth-Cozens J, Greenhalgh J. Doctors' perceptions of the links between stress and lowered clinical care. *Soc Sci Med* 1997;**44**(7):1017-22.
12. West CP, Tan AD, Habermann TM, et al. Association of resident fatigue and distress with perceived medical errors. *JAMA* 2009;**302**(12):1294-300.
13. Shanafelt TD, Bradley KA, Wipf JE, et al. Burnout and self-reported patient care in an internal medicine residency program. *Ann Intern Med* 2002;**136**(5):358-67.
14. Angerer P, Weigl M. Physicians' Psychosocial Work Conditions and Quality of Care: A Literature Review. *Professions and Professionalism* 2015;**5**(1).
15. Scheepers RA, Boerebach BCM, Arah OA, et al. A Systematic Review of the Impact of Physicians' Occupational Well-Being on the Quality of Patient Care. *Int J Behav Med* 2015;**22**(6):683-98.
16. Le Grand J. *Motivation, agency, and public policy: of knights and knaves, pawns and queens*: Oxford University Press on Demand, 2003.
17. Eijkenaar F, Emmert M, Scheppach M, et al. Effects of pay for performance in health care: a systematic review of systematic reviews. *Health Policy* 2013;**110**(2):115-30.
18. Lindgren Å, Bååthe F, Dellve L. Why risk professional fulfilment: a grounded theory of physician engagement in healthcare development. *Int J Health Plann Manage* 2013;**28**(2):e138-e57.
19. Khullar D, Chokshi DA, Kocher R, et al. Behavioral economics and physician compensation—promise and challenges. *N Engl J Med* 2015;**372**(24):2281-83.
20. Knorring Mv, Dept of Clinical N, Inst för klinisk n, et al. The manager role in relation to the medical profession, 2012.
21. Shanafelt TD, Gorringer G, Menaker R, et al. Impact of organizational leadership on physician burnout and satisfaction. *Mayo Clin Proc* 2015;**90**(4):432-40.
22. von Knorring M, Alexanderson K, Eliasson MA. Healthcare managers' construction of the manager role in relation to the medical profession. *J Health Organ Manag* 2016;**30**(3):421-40.
23. Baathe F, Norback LE. Engaging physicians in organisational improvement work. *J Health Organ Manag* 2013;**27**(4):479-97.

24. Weigl M, Hornung S, Angerer P, et al. The effects of improving hospital physicians working conditions on patient care: a prospective, controlled intervention study. *BMC Health Serv Res* 2013;**13**(1):1.
25. Shanafelt TD, Noseworthy JH. Executive Leadership and Physician Well-being: Nine Organizational Strategies to Promote Engagement and Reduce Burnout. *Mayo Clin Proc* 2017;**92**(1):129-46.
26. Dickson G. Anchoring physician engagement in vision and values: principles and framework. Saskatchewan: Regina Qu'Appelle Health Region 2012.
27. Berwick DM, Nolan TW. Physicians as leaders in improving health care: a new series in *Annals of Internal Medicine*. *Ann Intern Med* 1998;**128**(4):289-92.
28. Kaissi A. Enhancing Physician Engagement: An International Perspective. *Int J Health Serv* 2014;**44**(3):567-92.
29. Bååthe F. Physicians' engagement: qualitative studies exploring physicians' experiences of engaging in improving clinical services and processes [Doctoral thesis,]. Sahlgrenska Academy at the University of Gothenburg, 2015.
30. Dyrbye LN, Trockel M, Frank E, et al. Development of a Research Agenda to Identify Evidence-Based Strategies to Improve Physician Wellness and Reduce Burnout/Identifying Strategies to Improve Physician Wellness and Reduce Burnout. *Ann Intern Med* 2017.
31. Sinsky CA, Willard-Grace R, Schutzbank AM, et al. In search of joy in practice: a report of 23 high-functioning primary care practices. *Ann Fam Med* 2013;**11**(3):272-78.
32. Bringedal B, B C. Styring for kvalitet og likebehandling. Norske legers syn på styringsinstrumentenes betydning. (Governance for quality and equity. Norwegian physicians' views on the effects of steering instruments.). In: Aasen B, et al.; ed. *Prioritering, styring og likebehandling Utfordringer i norsk helsetjeneste*. Oslo: Cappelen Akademiske, 2018.
33. [The Health Services Campaign] Helsetjenesteaksjonen 2015 . . <http://helsetjenesteaksjonen.no/> (20.12.2018).
34. Aasland OG, Rosta J, Nylenna M. Healthcare reforms and job satisfaction among doctors in Norway. *Scandinavian journal of public health* 2010;**38**(3):253-58.
35. Casalino LP, Crosson FJ. Physician Satisfaction and Physician Well-Being: Should Anyone Care? 2015 2015;**5**(1).
36. Hertzberg TK, Skirbekk H, Tyssen R, et al. The hospital doctor of today-still continuously on duty. *Tidsskrift for den Norske lægeforening: tidsskrift for praktisk medicin, ny række* 2016;**136**(19):1635-38.
37. Aasland O, Rosta J. Hvordan har overlegene det? [The hospital consultant - how are they?] (In Norwegian). *Overlegen* 2011;**1**:47-55.
38. West CP, Dyrbye LN, Shanafelt TD. Physician burnout: contributors, consequences and solutions. *J Intern Med* 2018.
39. Patton MQ. *Qualitative research & evaluation methods*. London: SAGE, 2002.
40. Greenhalgh T, Robert G, Macfarlane F, et al. Diffusion of Innovations in Service Organizations: Systematic Review and Recommendations. *Milbank Q* 2004;**82**(4):581-629.
41. Ellström PE, Rönqvist D, Thunborg C. *Omvärld, verksamhet och förändrade kompetenskrav inom hälso- och sjukvården: en studie av föreställningar hos centrala aktörer inom ett landsting*: Linköpings universitet. Institutionen för pedagogik och psykologi, 1994.
42. Kvale S, Brinkmann S. *Den kvalitativa forskningsintervjun (The Qualitative Research Interview)*. Lund: Studentlitteratur, 2009.
43. Miles MB, Huberman AM, Saldaña J. *Qualitative data analysis: A methods sourcebook*: SAGE Publications, Incorporated, 2013.
44. Malterud K, Siersma VD, Guassora AD. Sample Size in Qualitative Interview Studies Guided by Information Power. *Qual Health Res* 2015:1049732315617444.

- 1
- 2
- 3
- 4 45. Miles MB, Huberman AM. *Qualitative data analysis : an expanded sourcebook*. Thousand Oaks, CA: Sage, 1994.
- 5
- 6 46. World Medical Association. World medical association declaration of helsinki: Ethical principles
- 7 for medical research involving human subjects. *JAMA* 2013;**310**(20):2191-94.
- 8 47. Helse- og omsorgsdepartementet. Lov om medisinsk og helsefaglig forskning
- 9 (helseforskningsloven) <https://lovdata.no/dokument/NL/lov/2008-06-20-44>. LOV-2008-06-
- 10 20-44.
- 11 48. Edwards N, Kornacki MJ, Silversin J. Unhappy doctors: what are the causes and what can be
- 12 done? *BMJ* 2002;**324**(7341):835-38.
- 13 49. Royal College of Physicians. Doctors in society: medical professionalism in a changing world.
- 14 Report of a Working Party of the Royal College of Physicians of London. London: RCP, 2005,
- 15 2005.
- 16 50. Cruess RL, Cruess SR, Boudreau JD, et al. A Schematic Representation of the Professional Identity
- 17 Formation and Socialization of Medical Students and Residents: A Guide for Medical
- 18 Educators. *Acad Med* 2015:1.
- 19 51. Gunderman R. Have Doctors Joined the Working Class?. Sep 26, 2014 ed.
- 20 <http://thehealthcareblog.com/blog/2014/09/26/what-would-marx-do/>, 2014.
- 21
- 22
- 23 52. Epstein RM, Privitera MR. Doing something about physician burnout. *The Lancet*
- 24 2016;**388**(10057):2216-17.
- 25 53. Frankl VE. *Man's search for meaning*: Simon and Schuster, 1985.
- 26 54. Bailey C, Madden A. What Makes Work Meaningful -- Or Meaningless. *MIT Sloan Management*
- 27 *Review* 2016;**57**(4):53-61.
- 28 55. Morrison I, Smith R. Hamster Health Care: Time To Stop Running Faster And Redesign Health
- 29 Care. *BMJ: British Medical Journal* 2000;**321**(7276):1541-42.
- 30 56. Dyrbye LN, Shanafelt TD, Sinsky CA, et al. Burnout among health care professionals: A call to
- 31 explore and address this underrecognized threat to safe, high-quality care. *NAM (National*
- 32 *Academy of Medicine) Perspective* 2017.
- 33 57. Friedberg MW, Chen PG, Van Busum KR, et al. *Factors affecting physician professional*
- 34 *satisfaction and their implications for patient care, health systems, and health policy*: RAND
- 35 corporation, 2013.
- 36 58. Wallace J, Lemaire J, Ghali W. Physician wellness: a missing quality indicator. *The Lancet*
- 37 2009;**374**(9702):1714-21.
- 38 59. Diderichsen S. It's just a job: a new generation of physicians dealing with career and work ideals.
- 39 Umeå universitet, 2017.
- 40 60. Hertzberg TK, Isaksson Rø K, Vaglum P, et al. Work-home interface stress: an important predictor
- 41 of emotional exhaustion 15 years into a medical career. *Ind Health* 2016;**54**(2):139-48.
- 42 61. Hamilton C. Downshifting in Britain. A sea-change in the pursuit of happiness 2003;**2**.
- 43 62. Bovier PA, Perneger TV. Predictors of work satisfaction among physicians. *Eur J Public Health*
- 44 2003;**13**(4):299-305.
- 45 63. West CP, Huschka MM, Novotny PJ, et al. Association of perceived medical errors with resident
- 46 distress and empathy: A prospective longitudinal study. *JAMA* 2006;**296**(9):1071-78.
- 47 64. Bliss M. *William Osler: a life in medicine*. . New York: Oxford University Press, 1999.
- 48 65. Parsa-Parsi R. The revised declaration of geneva: A modern-day physician's pledge. *JAMA*
- 49 2017;**318**(20):1971-72.
- 50 66. Davies H, Powell A, Rushmer R. Why don't clinicians engage with quality improvement? *J Health*
- 51 *Serv Res Policy* 2007;**12**(3):129-30.
- 52 67. Swensen S, Kabcenell A. Physician-Organization Collaboration Reduces Physician Burnout and
- 53 Promotes Engagement: The Mayo Clinic Experience. *J Healthc Manag* 2016;**61**(2):105-27
- 54 23p.
- 55 68. Baathe F, Ahlborg Jr G, Lagström A, et al. Physician experiences of patient-centered and team-
- 56 based ward rounding—an interview based case-study. *J Hosp Adm* 2014;**3**(6):p127.
- 57
- 58
- 59
- 60



- 1  
2  
3 69. Stacey R. *The Tools and Techniques of Leadership and Management: Meeting the challenge of*  
4 *complexity*. London: Routledge, 2012.  
5 70. Stacey RD, Mowles C. *Strategic management and organisational dynamics: the challenge of*  
6 *complexity to ways of thinking about organisations*. Harlow, United Kingdom: Pearson  
7 Education, 2016.  
8 71. Czarniawska B. *Narratives in social science research*. London: SAGE, 2004.  
9 72. Larsson S. A pluralist view of generalization in qualitative research. *International Journal of*  
10 *Research & Method in Education* 2009;**32**(1):25-38.  
11 73. Van Maanen J, Barley SR. Occupational communities: culture and control in organizations. *Res*  
12 *Organ Behav*, 1984:287-365.  
13 74. Wenger E. Communities of Practice and Social Learning Systems. *Organization* 2000;**7**(2):225-46.  
14  
15  
16  
17  
18  
19  
20  
21  
22  
23  
24  
25  
26  
27  
28  
29  
30  
31  
32  
33  
34  
35  
36  
37  
38  
39  
40  
41  
42  
43  
44  
45  
46  
47  
48  
49  
50  
51  
52  
53  
54  
55  
56  
57  
58  
59  
60

For peer review only

1  
2  
3  
4  
5  
6  
7  
8  
9  
10  
11  
12  
13  
14  
15  
16  
17  
18  
19  
20  
21  
22  
23  
24  
25  
26  
27  
28  
29  
30  
31  
32  
33  
34  
35  
36  
37  
38  
39  
40  
41  
42  
43  
44  
45  
46  
47  
48  
49  
50  
51  
52  
53  
54  
55  
56  
57  
58  
59  
60

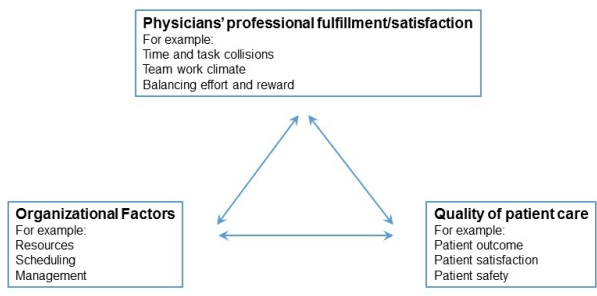

Figure 1. Conceptual model used in the interview situation

338x190mm (96 x 96 DPI)

## Interview guide:

- Describe your role as physician here at the hospital
  - Position, seniority (consultant, resident, intern), specialty/sub-specialty, researcher
- Describe a day when you go home happy/satisfied/content with your workday
  - Describe another day when you go home and are not happy/satisfied/content
    - What are your thoughts about what it is that makes the difference?
- What are your experiences from the interactions between physician's professional fulfillment/satisfaction, organizational factors and quality of patient care?
  - Are there any challenges where you work today in relation to these interactions?
    - Examples from own individual experiences preferred
    - From your own experiences and reflections – what are perspectives that would benefit from being improved?
      - How does this relate to your own professional fulfillment/satisfaction?
      - How does this relate to quality of patient care?
      - Is it measured per today? How would you go about to measure this?
- Which of the targets and measurements that your department follow are you aware of?
  - Are any of these really important for you/ that you actively track and follow?
  - Are there other measurements you would appreciate to follow?
- Do you experience that the organization is supportive and facilitates for you to come up with suggestions for improvements?
  - When was the last time you had an idea/suggestion for improvement? (concrete example)
    - How did you go about to get support and initiate change based upon your idea/suggestion?
    - Has your idea/suggestion become reality?
  - From your own experience, what can be done, if anything, to further facilitate for new ideas to improve clinical practice?
- If you were the Head of the Department or Hospital Director are there things you would really want to pay additional attention to?
- Are there other questions you would have wanted us to ask, in relation to this research area?

**Much appreciate your time and effort in participating!**



**LEFO**

Institute for Studies of  
the Medical Profession

## Standards for reporting Qualitative Research (SRQR \*)

| No.                       | Topic                                                                                        | Item found at page     |
|---------------------------|----------------------------------------------------------------------------------------------|------------------------|
| <b>Title and Abstract</b> |                                                                                              |                        |
| S1                        | Title                                                                                        | 1                      |
| S2                        | Abstract                                                                                     | 1                      |
| <b>Introduction</b>       |                                                                                              |                        |
| S3                        | Problem formulation                                                                          | 2                      |
| S4                        | Purpose or research question                                                                 | 3                      |
| <b>Methods</b>            |                                                                                              |                        |
| S5                        | Qualitative approach and research paradigm                                                   | 3                      |
| S6                        | Researcher characteristics and reflexivity                                                   | 5                      |
| S7                        | Context                                                                                      | 4                      |
| S8                        | Sampling strategy                                                                            | 5                      |
| S9                        | Ethical issues pertaining to human subjects                                                  | 5                      |
| S10                       | Data collection methods                                                                      | 5                      |
| S11                       | Data collection instruments and technologies                                                 | 5                      |
| S12                       | Units of study                                                                               | 5                      |
| S13                       | Data processing                                                                              | 5                      |
| S14                       | Data analysis                                                                                | 5                      |
| S15                       | Technique to enhance trustworthiness                                                         | 3, 5, 11               |
| <b>Results/Findings</b>   |                                                                                              |                        |
| S16                       | Synthesis and interpretation                                                                 | 6,7,8,9,10             |
| S17                       | Links to empirical data                                                                      | 6,7,8,9,10             |
| <b>Discussion</b>         |                                                                                              |                        |
| S18                       | Integration with prior work, implications, transferability, and contribution(s) to the field | 11, 12, 13, 14, 15, 16 |
| S19                       | Limitations                                                                                  | 10                     |
| <b>Other</b>              |                                                                                              |                        |
| S20                       | Conflicts of interest                                                                        | 17                     |
| S21                       | Funding                                                                                      | 17                     |

\* **Standards for Reporting Qualitative Research: A Synthesis of Recommendations.**

O'Brien, Bridget; Harris, Ilene; Beckman, Thomas; Reed, Darcy; MD, MPH; Cook, David; MD, MHP

Academic Medicine. 89(9):1245-1251, September 2014.

DOI: 10.1097/ACM.0000000000000388

1  
2  
3  
4  
5  
6  
7  
8  
9  
10  
11  
12  
13  
14  
15  
16  
17  
18  
19  
20  
21  
22  
23  
24  
25  
26  
27  
28  
29  
30  
31  
32  
33  
34  
35  
36  
37  
38  
39  
40  
41  
42  
43  
44  
45  
46  
47  
48  
49  
50  
51  
52  
53  
54  
55  
56  
57  
58  
59  
60

For peer review only

'E

# BMJ Open

## How do doctors experience the interactions among professional fulfillment, organizational factors and quality of patient care? A qualitative study in a Norwegian hospital

|                                 |                                                                                                                                                                                                                                                                                                                                |
|---------------------------------|--------------------------------------------------------------------------------------------------------------------------------------------------------------------------------------------------------------------------------------------------------------------------------------------------------------------------------|
| Journal:                        | <i>BMJ Open</i>                                                                                                                                                                                                                                                                                                                |
| Manuscript ID                   | bmjopen-2018-026971.R2                                                                                                                                                                                                                                                                                                         |
| Article Type:                   | Research                                                                                                                                                                                                                                                                                                                       |
| Date Submitted by the Author:   | 18-Mar-2019                                                                                                                                                                                                                                                                                                                    |
| Complete List of Authors:       | Bååthe, Fredrik; LEFO - Institute for studies of the medical profession; Institutet for stressmedicin, Rosta, Judith; LEFO - Institute for studies of the medical profession<br>Bringedal, Berit ; LEFO - Institute for studies of the medical profession<br>Rø, Karin; LEFO - Institute for studies of the medical profession |
| <b>Primary Subject Heading</b>: | Qualitative research                                                                                                                                                                                                                                                                                                           |
| Secondary Subject Heading:      | Health services research, Medical management, Health policy, Evidence based practice, Communication                                                                                                                                                                                                                            |
| Keywords:                       | HEALTH SERVICES ADMINISTRATION & MANAGEMENT, EDUCATION & TRAINING (see Medical Education & Training), ETHICS (see Medical Ethics), PREVENTIVE MEDICINE, QUALITATIVE RESEARCH                                                                                                                                                   |
|                                 |                                                                                                                                                                                                                                                                                                                                |

SCHOLARONE™  
Manuscripts

1  
2  
3 **How do doctors experience the interactions among professional fulfillment, organizational**  
4 **factors and quality of patient care? A qualitative study in a Norwegian hospital**  
5  
6  
7  
8

---

9 Authors: Fredrik Bååthe, Judith Rosta, Berit Bringedal, Karin Isaksson Rø

10  
11 Corresponding author: Fredrik Bååthe, Beckasinvägen 2, 42933 Kullavik, Sweden,  
12 fredrik.baathe@vgregion.se, +46736601710  
13

14  
15 Fredrik Bååthe,  
16 LEFO -Institute for Studies of the Medical Profession, LEFO, Oslo, Norway;  
17 Sahlgrenska Academy at Gothenburg University, Sweden;  
18 Sahlgrenska University Hospital, Gothenburg, Sweden;  
19 Institute of Stressmedicin, Region Västra Götaland, Sweden  
20

21 Judith Rosta  
22 LEFO - Institute for Studies of the Medical Profession, Oslo, Norway  
23

24  
25 Berit Bringedal  
26 LEFO - Institute for Studies of the Medical Profession, Oslo, Norway  
27

28 Karin Isaksson Rø,  
29 LEFO - Institute for Studies of the Medical Profession, Oslo, Norway;  
30 Dept. of Behavioural Sciences in Medicine, Institute of Basic Medical Sciences, Medical Faculty,  
31 University of Oslo  
32

33  
34 Keywords: Physician, professional fulfillment, satisfaction, patient-quality, organization  
35

36 5997 words  
37  
38  
39  
40  
41  
42  
43  
44  
45  
46  
47  
48  
49  
50  
51  
52  
53  
54  
55  
56  
57  
58  
59  
60

1  
2  
3 **Objectives:** Doctors increasingly experience high levels of burnout and loss of engagement. To  
4 address this there is a need to better understand doctors work situation. This study explores how  
5 doctors experience the interactions among professional fulfillment, organizational factors and  
6 quality of patient care.  
7  
8  
9

10  
11  
12  
13 **Design:** An exploratory qualitative study design with semi-structured individual interviews was  
14 chosen. Interviews were transcribed verbatim and analyzed by a transdisciplinary research group.  
15

16  
17 **Setting:** The study focused on a surgical department of a mid-sized hospital in Norway  
18

19  
20 **Participants:** Seven doctors were interviewed. A purposeful sampling was used with gender and  
21 seniority as selection criteria. Three senior doctors (two female, one male) and four in training (three  
22 male, one female) were interviewed.  
23  
24  
25

26  
27 **Results:** We found that in order to provide quality care to the patients, individual doctors describe  
28 “stretching themselves” i.e. handling the tensions between quantity and quality, to overcome  
29 organizational shortcomings. Experiencing a workplace emphasis on production numbers and  
30 budget concerns led to feelings of estrangement among the doctors. Participants reported a shift  
31 from serving as trustworthy, autonomous professionals to becoming production workers, where  
32 professional identity was threatened. They felt less aligned with work-place values, in addition to  
33 experiencing limited management recognition for quality of patient care. Management initiatives to  
34 include doctors in development of organizational policies, processes and systems were sparse.  
35  
36  
37  
38  
39  
40  
41  
42  
43

44 **Conclusion:** The interviewed doctors described their struggle to balance the inherent tension among  
45 professional fulfillment, organizational factors and quality of patient care in their everyday work.  
46 They communicated how “stretching themselves”, to overcome organizational shortcomings, is no  
47 longer a feasible strategy without compromising both professional fulfillment and quality of patient  
48 care. Managers need to ensure that doctors are involved when developing organizational policies,  
49 processes and systems. This is likely to be beneficial for both professional fulfillment and quality of  
50 patient care.  
51  
52  
53  
54  
55  
56  
57  
58  
59  
60



### Strengths and limitations of this study

In this exploratory study, given our priority to capture in-depth, nuanced aspects, individual doctor interviews were given priority over the potentially higher number of participants that could have been included in group interviews. The interdisciplinary research group, conducting the analytical work, further provides a methodological basis to find a rich interpretation towards an empirically grounded doctors' voice.

This study has a potential limitation in that the empirical material was based on interviews with only seven doctors (this represented about 30% of the doctors working at the department). In order to capture input also from doctors not being interviewed a feedback session was included, where the researchers presented tentative findings to the larger group of doctors at the department. Both those who participated in interviews and several doctors who had not been interviewed, confirmed the researchers understanding of the local work situation. This substantiates the findings.

Transferability of this study with a small sample of doctors from a hospital is not claimed; however, being consistent with previous research, our study findings can be useful to healthcare delivery organizations experiencing similar challenges in their specific context.

## Introduction

High-quality health care depends not only on high-tech equipment, sufficient resources and reliable evidence, but also on health professionals who are engaged and find meaning with their work. Researchers have recently argued for expanding the traditional health care improvement goals. In addition to enhancing patient treatment, securing the population's health and reducing the per capita cost of health care <sup>1</sup>, they argue for promoting professional fulfillment<sup>2-4</sup>. Bodenheimer and Sinsky expressed this succinctly as, "care of the patient requires care of the provider" <sup>5</sup>.

In order to improve quality of care, while containing costs, and promoting professional fulfillment we seem to need additional knowledge. A review from 2013 found that 70% of interventions aiming to improve quality and reduce health care costs did not succeed in doing both<sup>6</sup>. Common strategies were hospital or department mergers and downsizing, without attaining increased quality<sup>7</sup> and leading to negative effects for work environment as well as increased stress, burnout and feelings of alienation among employees <sup>8-10</sup>.

Several studies have explored links between professional fulfilment and different measures of quality of care (both as perceived by doctors themselves or more objectively measured in relation to treatment outcomes or patient complaints) <sup>11-15</sup>. Other studies have explored the relationships between different organizational factors and how they influence professional behavior, motivation, engagement and satisfaction<sup>16-22</sup>. Only few studies have studied the dynamic interaction among all three dimensions - organizational factors, quality of patient care and professional fulfillment <sup>23-25</sup>. Although these studies indicate the importance of doctors' active involvement in change processes, research informs us that such engagement is limited<sup>26-29</sup>. We need to understand more about these relationships. To better care for the

1  
2  
3 providers, a better understanding of the interactions among professional fulfillment, quality  
4 of patient care and organizational factors is needed<sup>30</sup>. There seems to be a call for research  
5  
6 to provide more practice-informed and actionable knowledge to facilitate local workplace  
7  
8 development<sup>30 31</sup>.  
9  
10

11  
12  
13 In Norway, as in other countries, recent decades have seen a stronger emphasis on budget  
14 control and value for money. A number of reforms are implemented, all with the intention  
15 to improve quality, reduce waste, and lead to better priorities. The many reforms and  
16 increased focus on budget constraints seem to have led to some skepticism among  
17  
18 doctors<sup>32</sup>. Norwegian doctors have expressed their worries about maintaining the quality of  
19 care through the many reforms and changes<sup>33</sup>  
20  
21  
22  
23  
24  
25  
26  
27  
28

29 The Norwegian health care system is a single payer, universal coverage system, funded by  
30 the State. Hospital care is organized as regional trusts with independent boards. Yearly  
31 contracts are made with the Ministry of Health. Primary care is organized with independent  
32 contractors to the health care system. GPs are gatekeepers to specialist care and patients  
33 need to first meet with a GP before having access to specialist care. Patients incur a nominal  
34 co-payment when receiving care services and the bulk of the funding comes from the State.  
35  
36 Although doctors in Norway<sup>34</sup> (as in other Western countries<sup>35</sup>) have high scores on work  
37 satisfaction, there is a clear difference between specialties. Community doctors and general  
38 practitioners scored highest and doctors in surgical disciplines lowest<sup>36</sup>. Qualitative  
39 interviews of hospital doctors have found that surgeons, as one of three specialties,  
40 experience conflicts between adhering to their views of what a good doctor is/does and the  
41 consequences this has for the interaction with healthcare leaders, their colleagues and for  
42 the balance between work and home<sup>37</sup>. In 2008 more than 30% of senior and 18% of junior  
43  
44  
45  
46  
47  
48  
49  
50  
51  
52  
53  
54  
55  
56  
57  
58  
59  
60

1  
2  
3 hospital doctors reported working under "unacceptably" high rates of stress fairly often or  
4  
5 often and over 75% of hospital doctors reported fairly or very high stress related to frequent  
6  
7 reorganizations<sup>38</sup>.  
8  
9

10  
11 Thus, exploring how Norwegian doctors understand the relationships among organizational  
12  
13 factors, professional fulfillment and quality of patient care will inform and support  
14  
15 commensurate interventions toward improving doctors' well-being and the quality of  
16  
17 patient care<sup>39</sup>.  
18  
19

### 20 21 **Aim**

22  
23  
24 The study aims to explore how doctors experience the interactions among professional  
25  
26 fulfillment, organizational factors and quality of patient care.  
27  
28  
29

### 30 31 **Methods**

#### 32 33 **Design**

34  
35 An exploratory qualitative study design was chosen. Such a design is appropriate when  
36  
37 there is limited knowledge<sup>40</sup>. This study was conducted as the first part of a multi-year and  
38  
39 multi-site interactive<sup>41 42</sup> research project, interviewing doctors from two hospitals in  
40  
41 Norway and one in the USA. This article focuses the first set of doctor interviews from one  
42  
43 of the Norwegian hospitals.  
44  
45  
46  
47

#### 48 49 **Setting**

50  
51  
52 The study was done in a mid-sized emergency hospital in Norway. The hospital provides  
53  
54 medical, surgical and psychiatric care with approximately 1,400 employees who serve a  
55  
56 population of about 135,000. This is also a teaching hospital for doctors and nurses. The  
57  
58 hospital has, during the last years, reorganized the executive leaders and engaged in a  
59  
60

1  
2  
3 hospital wide leadership development program to create alignment with how new societal  
4 requirements are integrated and to facilitate improvements of managerial processes and  
5  
6 processes impacting quality of patient care.  
7  
8  
9

10  
11 Following a presentation about the study to the hospital management, the researchers  
12  
13 received approval to approach department managers. The study's aim and interactive study  
14  
15 concept were presented to the group of doctors and head of the department. Following an  
16  
17 internal discussion, the surgical department agreed to participate. Both doctors and the  
18  
19 leader of the surgical department expressed appreciation of the cooperative aspects of the  
20  
21 study and the explicit intent to listen to doctors' voices about their local situation.  
22  
23  
24  
25

### 26 ***Participants***

27  
28  
29 The participating surgical department asked us to work with a small study population in  
30  
31 order to minimize time conflict with doctors' clinical work, without compromising the  
32  
33 quality of the study. Based on experience from the research field and from interviewing  
34  
35 doctors in other hospital settings we agreed on a minimum number of seven doctors. This is  
36  
37 about a third of all doctors at the department. For the most effective use of the limited  
38  
39 resources we used a purposeful sampling, which is a widely used technique for identification  
40  
41 and selection of information rich cases<sup>40</sup>. Gender and seniority were used as selection  
42  
43 criteria to provide maximum variation<sup>43</sup> in the empirical material. Three participants were  
44  
45 senior doctors (two female, one male) and four were in training (three male, one female).  
46  
47  
48  
49  
50  
51  
52  
53  
54

### 55 ***Data Collection***

56  
57  
58  
59  
60

1  
2  
3 Data was collected via individual interviews. A semi-structured interview guide was used to  
4  
5 facilitate consistency between interviews<sup>40</sup>. The questions were inspired by the quadruple  
6  
7 aim<sup>5</sup> and Appreciative Inquiry<sup>44</sup>. The interview guide was initially developed by FB. It was  
8  
9 then tested on KIR for readability and clarity. After adjustments and a new test with  
10  
11 evaluation it was accepted. All interviews were done in the local language. We constructed  
12  
13 open-ended questions to allow the respondent to tell their own story<sup>45</sup>. Each interview  
14  
15 started with questions about number of years working as a doctor and the current position.  
16  
17 Then the respondents were asked to describe a day when they felt satisfied or fulfilled at  
18  
19 work, and a day when they did not. After this they were asked to reflect on the relationships  
20  
21 among professional fulfillment, quality of patient care and organizational factors. To be  
22  
23 consistent when introducing this question the respondents were shown a conceptual model  
24  
25 (figure 1). Each doctor received a written and oral description of the study before signing  
26  
27 the written consent and before the interview started. An interview guide, translated into  
28  
29 English, is available as Appendix 1.

30  
31  
32  
33  
34  
35  
36  
37  
38 [Figure 1 here]

39  
40 **Figure 1.** Conceptual framework used in the interview situation

41  
42  
43 The individual doctor interviews were conducted in November and December 2016.

44  
45 Interviews took place in a conference facility in the hospital area and were digitally  
46  
47 recorded. Each interview was scheduled to last 60 minutes. The researchers allowed  
48  
49 participants to use more time in order to provide information richness, given the limited  
50  
51 numbers of interviews. This resulted in an average interview time of 74 minutes.

52  
53  
54 In order to capture rich information from this small number of participants<sup>46</sup> we were two  
55  
56 experienced researchers with complementary experience participating in every interview,  
57  
58  
59  
60

1  
2  
3 but one. During the interview one researcher was leading while the other listened and took  
4  
5 extensive notes, occasionally interacting to further probe interesting aspects relating to the  
6  
7 study aim. Both researchers (PhD) had solid experience with physician interviews and knew  
8  
9 the research field well. One interviewer (KIR) has a background as an occupational physician  
10  
11 and many years of experience counseling doctors both individually and in groups. The other  
12  
13 interviewer (FB) has a professional background as department head at a university hospital,  
14  
15 working with organizational development for many years, educational background from  
16  
17 industrial engineering and management and consultant level training in group relations  
18  
19 theory.  
20  
21  
22  
23  
24  
25

### 26 ***Analysis***

27  
28 To provide for a multifaceted interpretation of the empirical material, the analytical process  
29  
30 involved a team of four researchers with complimentary experiences. In addition to those  
31  
32 two who conducted the interviews, a senior researcher (PhD) with experience in  
33  
34 epidemiology and with professional background in surgical nursing took part (JR), as well as  
35  
36 a senior health care researcher with a PhD in sociology (BB).  
37  
38  
39  
40  
41  
42  
43

44 The analytical process started with a tentative analysis to capture the main content from the  
45  
46 interviews. The two interviewers (FB+KIR) went through their notes and impressions from  
47  
48 the interviews and started to create an overarching understanding. JR listened to all audio  
49  
50 recordings and made notes with the targeted task to ask the material two key questions:  
51  
52 What is the most pressing problem? What do they do to handle/solve this problem? BB  
53  
54 listened to most of the interviews and made notes about her first impressions. The research  
55  
56 group then met and compared initial notes. This first step provided an overall perspective  
57  
58  
59  
60

1  
2  
3 that was presented back to the department to allow them to react to it. This material  
4  
5 provided good resonance with the participants, and also with the other doctors who were  
6  
7 present in the meeting but had not been interviewed. Also the head of the department  
8  
9 confirmed that what the researcher presented back to the department was in line with his  
10  
11 understanding. .  
12  
13

14  
15 The more developed analytical process was guided by Miles and Huberman <sup>47</sup> and was done  
16  
17 without specific analytical software. All interviews were transcribed verbatim in the local  
18  
19 language. Based on the study aim, the interviews were read individually to capture words  
20  
21 and sentences, meaning units, which showed similarities in terms of content. These  
22  
23 meaning units were condensed and labeled with a descriptive code close to the textual  
24  
25 meaning. Sometimes these codes were in English and sometimes they were in the local  
26  
27 language. The research group met and each person presented their descriptive coding.  
28  
29 Mostly there was congruence. When congruence was not experienced, face to face  
30  
31 conversations were carried out to challenge each other's perspective. Sometimes these  
32  
33 conversations went back to the original text to find a common ground and interpretation,  
34  
35 before moving on. The researchers then worked to group the descriptive codes, and related  
36  
37 meaning units, based on the ones having similar content. Each grouping received a tentative  
38  
39 descriptive header. Once this was in place, two alternative routes of further sorting and  
40  
41 abstraction were followed in a comprehensive analysis of the content. One was to use the  
42  
43 conceptual framework from the interview (Fig 1) and organize the different groupings in  
44  
45 relation to if it concerned professional fulfillment, organizational factors or quality of patient  
46  
47 care. This process created, at first, an experience of structure and cleanliness, but over time  
48  
49 provided a blurred result, with a residual of empirical material that fitted in any or all of the  
50  
51 three aspects. The other analytical route was to look for grouping that could be combined  
52  
53  
54  
55  
56  
57  
58  
59  
60



1  
2  
3 with only slightly broadening or altering the content, as symbolized by an adjustment of the  
4  
5  
6 descriptive header. This iterative process eventually contributed to form five empirical  
7  
8 themes that integrated all interview material into a comprehensive understanding.  
9

10 Quotations are used in the result section to allow individual doctor voices to illustrate a  
11  
12  
13 central content<sup>45</sup>.  
14  
15  
16

17  
18 The interdisciplinary group of authors worked both individually and in a group to enrich the  
19  
20 empirical interpretations and reduce the risk of any author overpowering the empirical  
21  
22 material of doctors' voices. During the analytical process we paid extra attention if we found  
23  
24 data that did not fit with the other data, indicating there were some empirical nuances we  
25  
26 were missing with our small sample of seven doctors. This did not happen and regardless of  
27  
28 gender or seniority there was a high degree of commonality between the different doctor  
29  
30 voices relating to the aim. During the analyses it became clear that the seven information  
31  
32 rich cases enabled a comprehensive understanding. It confirms, what Malterud<sup>46</sup> suggests,  
33  
34 that a limited number of information rich interviews can contribute with new meaningful  
35  
36 knowledge. During the analytical process alternative interpretations were continuously  
37  
38 sought through critical reflections and ongoing conversations during face-to-face meetings.  
39  
40 This process continued iteratively until alternative understandings and considerations were  
41  
42 reconciled into a coherent result. Patton suggests that this type of research group  
43  
44 triangulation is a way to reach comprehensive, robust and well-developed findings from a  
45  
46 rich empirical material <sup>40</sup>.  
47  
48  
49  
50  
51  
52  
53

#### 54 ***Ethics***

55  
56  
57  
58  
59  
60

1  
2  
3 This study followed the World Medical Association's Declaration of Helsinki <sup>48</sup>. The risk of  
4  
5 harm to the participants was very low, and thus the project did not meet the criteria  
6  
7  
8 justifying a formal application to the ethics board, consistent with Norwegian law <sup>49</sup>.  
9

### 10 ***Patient and Public Involvement***

11  
12  
13 Patients and the public were not involved in the design or planning of the study.  
14  
15  
16  
17  
18  
19  
20  
21  
22  
23  
24  
25  
26  
27  
28  
29  
30  
31  
32  
33  
34  
35  
36  
37  
38  
39  
40  
41  
42  
43  
44  
45  
46  
47  
48  
49  
50  
51  
52  
53  
54  
55  
56  
57  
58  
59  
60

For peer review only

## Results

Analyzing the interviewed doctors' experiences about the interactions among professional fulfillment, organizational factors and quality of patient care, resulted in an empirically grounded understanding with the following themes. (Quotes from participant are used to provide the original voice. Each doctor is assigned a random letter for anonymity.)

### ***Quality of care crowded out by production numbers and economic data***

Many doctors talked about how conversations at department meetings had changed. Previously, they were more about quality of clinical care, while now they mostly focused on the need to meet production targets and finding ways to handle budgetary constraints. The participant expressed how quality was starting to be experienced as an empty phrase, crowded out by production numbers and economic concerns.

*Quality is more and more becoming an empty term in relation to what the hospital values are. What we hear about is mostly money issues and production numbers. (Doctor A)*

Changes in workplace conversations, combined with an experience of limited recognition for good professional work, made some doctors express that they did not really "recognize the workplace". Some of them also expressed concerns about who they were becoming, in their role as doctors. One doctor experienced a change from being a trustworthy and autonomous professional, to becoming more of a production worker.

*I don't feel that I come to work as a capable and autonomous resource anymore. I feel I come to work only to produce a certain number of procedures. (Doctor B)*

1  
2  
3 While the interviewed doctors all appreciated swift and smooth operations, a new operating  
4 concept, with the explicit aim to increase output, troubled some. They expressed concerns  
5 about potential risks of patient complications since the allotted time was too limited to find  
6 anatomical landmarks and stop minor bleeding before proceeding to the next surgical step.  
7  
8 With a dominating focus on quantity, there was an emergent worry as to whether individual  
9 quality standards were compromised.  
10  
11  
12  
13  
14  
15  
16

17  
18 *Maybe the key dilemma is that you are pushed for quantity all the time. It*  
19 *leads you to start to feel, right after you go home from your on-call work,*  
20 *that you did not finish your task or finalize things the way you wanted to.*  
21 *You get pushed to increase quantity and it is affecting your own reference*  
22 *of good-quality work. (Doctor C)*  
23  
24  
25  
26  
27  
28  
29  
30

31 The participants expressed unease about conversations focusing more on cost and  
32 production than quality, but at the same time there was an awareness of the necessity of  
33 high productivity and cost control.  
34  
35  
36  
37  
38

39 *I am one of those doctors who consider that health care has an obligation*  
40 *to make sure we manage our resources and household with our tax-based*  
41 *money. (Doctor D)*  
42  
43  
44  
45  
46  
47

### 48 **“Stretching oneself” to deliver quality of patient care despite organizational shortcomings**

49

50 The participants emphasized the importance of delivering good quality care, even if it meant  
51 “stretching themselves” to overcome hindering organizational factors. The expression  
52 “stretching themselves” is a descriptive term arising from the empirical analysis. It is used to  
53 capture the experience that an individual doctor had to find workarounds, which often  
54  
55  
56  
57  
58  
59  
60

1  
2  
3 involved overextending oneself, to balance the tension between production quantity versus  
4  
5 quality, but also handling sudden resource shortages (“due to illness you now also need to  
6  
7 handle the ward in between doing your surgical cases”), and balancing the potential tension  
8  
9 between work and home. This way of ensuring quality of patient care was considered  
10  
11 common practice. However, several doctors had begun to wonder whether the individual  
12  
13 work-arounds could have negative consequences for the quality of patient care.  
14  
15

16  
17  
18 *One starts to wonder if this constant stretching of oneself can have*  
19  
20 *negative consequences. Like more patients expressing worries after their*  
21  
22 *operations. (Doctor E)*  
23  
24  
25

26  
27 One example of an organizational shortcoming concerned unforeseen variations in the daily  
28  
29 operating schedule. This could result in long work hours for the doctors, impinging on the  
30  
31 work-home balance. Another dimension of stretching relates to a so-called “contract of  
32  
33 conscience”. This was not a formal contract, but rather related to their professional identity  
34  
35 as doctors. The “contract” was driving them to further stretch themselves and spend  
36  
37 considerable time at work, on top of normal duties.  
38  
39  
40  
41

42  
43 *I have to be there until the operation is finished. I am really concerned*  
44  
45 *whether I will be in time for kindergarten. It generates a lot of frustration,*  
46  
47 *but I have an implicit contract with the patient and also to the hospital to*  
48  
49 *make sure the operation is carried through. (Doctor E)*  
50  
51

### 52 ***The accelerating struggle against time impacting well-being and quality of care***

53

54  
55 The struggle against time was a main concern in the interviews and the participants  
56  
57 experienced that it influenced their overall well-being.  
58  
59  
60

1  
2  
3 *Suddenly you have one of these time and task collisions and it increases*  
4 *work strain and stress, impacting physical and mental health. You know,*  
5 *when you are expected to be in three places at once, it sort of triggers your*  
6 *stress level. (Doctor C)*  
7  
8  
9  
10  
11  
12

13 The participants felt uncomfortable with an increasing number of time and task collisions  
14 and expressed concerns that this constant battle against time could jeopardize the quality of  
15 patient care.  
16  
17  
18  
19

20  
21 *There is a constant battle against time. We need time to make solid*  
22 *evaluations before and after operations. We are pushing the limits*  
23 *towards feeling uncomfortable. Definitely relating to quality of care.*  
24  
25  
26  
27  
28  
29 *(Doctor A)*  
30  
31

32 There were also experiences of stress in the operating room, a work place sanctuary where  
33 surgeons previously experienced that time was allowed to “stand still”.  
34  
35  
36

37  
38 *Over the last years, operating programs have expanded. It is not seldom*  
39 *that we push really hard to get through the program. As we realize we are*  
40 *not making it, you feel how stress is building up also in the operating room.*  
41  
42  
43  
44  
45 *(Doctor A)*  
46  
47

### 48 **Quality of patient care as the basis for professional fulfillment**

49

50  
51 The participants expressed that quality of patient care was foundational for their experience  
52 of professional fulfillment. Some of the doctors emphasized how the two were mutually  
53 reinforcing.  
54  
55  
56  
57  
58  
59  
60

1  
2  
3 *Vital for job satisfaction is that we have an experience that things go well*  
4  
5 *with our patients. (Doctor A)*  
6  
7

8  
9 The importance of continuity between the individual patient and the individual physician  
10 was also brought up as a central aspect of providing good care.  
11  
12

13  
14 *What gives me satisfaction is when I greet my patients, operate on them*  
15 *and follow up afterwards, so the patient is satisfied. That is all I wish for.*  
16  
17  
18  
19 *(Doctor B)*  
20  
21

22 Satisfied patients gave doctors a sense of accomplishment. A consequence was that a  
23 mistake made by a doctor that affected a patient discomposed the individual doctor.  
24  
25

26  
27  
28 *A downside of being a surgeon are complications, it sort of comes with the*  
29 *job. I had a severe surgical complication last week and this is darkening*  
30 *everything, it affected me fundamentally for many days. (Doctor G)*  
31  
32  
33  
34  
35

36 ***Management not recognizing quality of care challenges and providing limited support for***  
37 ***doctor initiatives***  
38  
39

40  
41 The interviewed doctors experienced how the managerial focus on increasing volume  
42 conveyed an implicit assumption that more output, of the same quality, could be created by  
43 simply increasing the speed. This way of communicating about how to increase surgical  
44 volume created a strong dissonance with the everyday challenges experienced in the clinic.  
45  
46  
47  
48  
49  
50

51  
52 *Everyone expects that treatments are first class. We only measure waiting*  
53 *times and how soon we have written the discharge summary, and similar*  
54 *unimportant things. Everybody expects treatments to be the same and*  
55 *quality to be the same, no matter what. That is not true! (Doctor F)*  
56  
57  
58  
59  
60

1  
2  
3 A number of different individual initiatives to improve quality and facilitate every day work  
4  
5 had been initiated. One doctor described saving time and increasing quality and safety by  
6  
7 making standard patient record templates for different operational procedures. Another  
8  
9 doctor worked to schedule ward rounds to make them visible, instead of being something  
10  
11 that the doctors were supposed to “squeeze in” between other scheduled tasks.  
12  
13  
14

15  
16 *We are measured on the number of operations we perform and on the*  
17  
18 *number of patients we see in the outpatient clinic. But we are not*  
19  
20 *measured on the time we spend on ward rounds. Talking with the doctor is*  
21  
22 *a major part of what patients appreciate when measuring patient*  
23  
24 *satisfaction. Now, ward rounds are scheduled. (Doctor G)*  
25  
26  
27  
28

29 The participants expressed a sense of disappointment, and surprise, that the organization  
30  
31 neither seemed to appreciate the individual initiatives, nor provide a structure to go from  
32  
33 the individual benefit towards benefitting the group of doctors. While many of the doctors  
34  
35 had limited or no suggestions about what management ought to do differently, some  
36  
37 suggested that the traditional hierarchical way of managing needs to be modernized.  
38  
39  
40

41  
42 *I think this is about hospital management still struggling to find a more*  
43  
44 *modern form. I find that teamwork is something that private enterprises*  
45  
46 *have focused on for a long time. But the old way of leading is still what*  
47  
48 *goes on in hospitals. With traditional hierarchies and top-down decisions.*  
49  
50  
51  
52 *(Doctor A)*  
53  
54

55 Several doctors experienced that management did not do enough to facilitate for doctors to  
56  
57 participate in clinical development work. There were also some who clearly articulated the  
58  
59  
60



1  
2  
3 need for a major overhaul of the existing hospital culture, towards a situation where  
4  
5 involvement from different employee groups was considered the norm.  
6  
7

8  
9 *If you are working with changes in such a fine-tuned and complex*  
10  
11 *environment as a hospital, one must involve those affected by a change.*  
12  
13 *You put small groups of surgeons and op-nurses together. Provide them*  
14  
15 *some time to work on specific issues. Listen attentively to what they say*  
16  
17 *about key pressure points and act accordingly. Not simply pushing*  
18  
19 *decisions down at people! (Doctor A)*  
20  
21  
22  
23  
24  
25  
26  
27

## 28 **Discussion**

29  
30 This study explores how doctors experience the interactions among professional fulfillment,  
31  
32 organizational factors and quality of patient care.  
33  
34

35  
36 The participants described how providing quality of patient care was the single most  
37  
38 important dimension contributing to their professional fulfillment. The interactions among  
39  
40 professional fulfillment, organizational factors and quality of patient care were often  
41  
42 experienced as resulting in complex and challenging situations. A doctor could be scheduled  
43  
44 to operate while also having to run to the ward to check on patients, or run late to pick up  
45  
46 children from daycare because shift times between operations ran longer than planned. The  
47  
48 interviewed doctors primarily handled this tension individually by "stretching themselves",  
49  
50 and working around organizational hindrances in order to, no matter what, provide quality  
51  
52 of patient care.  
53  
54  
55  
56  
57  
58  
59  
60

1  
2  
3 Quality of patient care is a key outcome for any healthcare organization. One might consider  
4 that statement as self-evident. In particular when working as a doctor in a hospital that is  
5 part of the societal infrastructure in Norway, a well-functioning and affluent Nordic country.  
6  
7  
8 On the other hand it might be prudent to remind ourselves that the amount of money  
9  
10 available to spend on healthcare is limited. This restriction might be even clearer in a tax-  
11  
12 financed healthcare system, like the Norwegian. There is thus a built-in tension that requires  
13  
14 a constant balancing of clinical needs with budgetary means.  
15  
16  
17  
18  
19

20  
21 The participants expressed how conversations about **quality of care were crowded out by**  
22  
23 **production numbers and economic data.** They conveyed that the essence of being a  
24  
25 professionally fulfilled doctor, creating high quality care for patients, no longer receives  
26  
27 sufficient recognition.  
28  
29

30  
31 This finding is in line with research pointing to changes in what society, patients and  
32  
33 employers are expecting from a doctor, and how this is starting to create a job situation that  
34  
35 is no longer what doctors expect<sup>50</sup>. The research suggests that clinical leaders have a crucial  
36  
37 role in supporting doctors to find meaning in a changing professional role<sup>10 51 52</sup>. The  
38  
39 inherent tension between an organizational focus on the bottom line and doctors' focus on  
40  
41 quality of patient care is found to increase the risk for experiencing meaninglessness,  
42  
43 especially in combination with a lack of managerial recognition for work well done<sup>53</sup>.  
44  
45  
46  
47

48 According to this research, the interviewed doctors express an unfortunate combination of  
49  
50 factors that are found to contribute to a sense of meaninglessness.  
51  
52

53  
54 Faced with an accelerating struggle against time, the participants described "**stretching**  
55  
56 **themselves" to deliver quality care despite organizational shortcomings.** The experience of  
57  
58 doctors having less time and more work is aligned with other studies<sup>25 54-56</sup>. However, in this  
59  
60

1  
2  
3 study, the participants describe how finding individual workarounds in order to handle  
4  
5 organizational shortcomings, no longer is experienced as sustainable. Our participants relate  
6  
7 how they have started to consider that quality of patient care, and their own wellbeing,  
8  
9 both could suffer from this way of overextending themselves.  
10  
11

12  
13 While limited time with patients was the primary concern, work–home balance was also an  
14  
15 issue that troubled many of the participants. This is in line with recent studies in Sweden  
16  
17 and Norway, where young doctors point to the importance of finding a job with good work-  
18  
19 home balance<sup>57 58</sup>. This view resonates with “downshifting”, a societal change defined by  
20  
21 some researchers as an endorsement of the question, “In the last ten years, have you  
22  
23 voluntarily made a long-term change in your lifestyle, other than planned retirement, which  
24  
25 has resulted in you earning less money?”. More time with family was the most important  
26  
27 reason for downshifting, followed by the desire to gain more control and personal  
28  
29 fulfillment<sup>59</sup>.  
30  
31  
32  
33  
34  
35

36 ***That quality of patient care is foundational for professional fulfillment*** has been found in  
37  
38 many previous studies<sup>55 60 61 62</sup>. While the professional identity of doctors has long hinged  
39  
40 on delivering good quality of patient care, more recently, the lack of physician well-being  
41  
42 has been recognized as a potential threat to quality care<sup>3</sup>. Research indicating a relationship  
43  
44 between strain and stress in doctors and negative impact on quality and safety of patient  
45  
46 care<sup>12 14 15</sup>, has also lead to an amendment of the Declaration of Geneva, as adopted by the  
47  
48 World Medical Association in 2017: “I will attend to my own health, well-being and abilities  
49  
50 in order to provide care of the highest standard”<sup>63</sup>.  
51  
52  
53  
54  
55  
56  
57  
58  
59  
60

1  
2  
3 The study participants experienced a hierarchical management culture and that  
4  
5 management did ***not recognize quality of care challenges and provided limited support for***  
6  
7  
8 ***doctor initiatives.***  
9

10  
11 The respondents expressed frustrations with the limited possibility to participate in  
12  
13 developing organizational policies, processes and systems. At the same time there were few  
14  
15 accounts of actual aspirations or doctors actively working to find solutions to organizational  
16  
17 shortcomings. These findings are aligned with other research reporting that doctors'  
18  
19 engagement in development work has been a challenge<sup>27 64 65</sup>. However, doctors who did  
20  
21 engage had positive experiences from similar improvement initiatives and had experienced  
22  
23 that also this type of work task contributed to their sense of professional fulfilment<sup>18 26 66</sup>  
24  
25  
26  
27

28  
29 To involve doctors in development work, recognizing their ideas and listening to understand  
30  
31 what the difficulties are, has been suggested as a central dimension to reduce burnout<sup>25 67</sup>.  
32

33  
34 A deliberate, collaborative process where managers commit scheduled doctor-time for this  
35  
36 type of work is key. What a manager says in conversations with the doctors, and what a  
37  
38 manager does really matters in relation to how clinicians participate in developing clinical  
39  
40 policies, processes and systems<sup>68-70</sup>. In order to support this process, organizational leaders  
41  
42 in healthcare need to be attuned to how psychological and social needs relate to doctors  
43  
44 motivation and engagement<sup>71 70 72</sup>. In a participatory change study, where doctors analyzed  
45  
46 work-related problems, created local solutions which were then implemented, working  
47  
48 conditions and patients' perceived quality of care both showed positive changes<sup>24</sup>. Another  
49  
50 study showed that doctors who were actively involved in the process of changing the local  
51  
52 ward round experienced better-informed clinical decisions, had fewer follow-up questions  
53  
54 from their patients and increased their own professional fulfillment<sup>73</sup>.  
55  
56  
57  
58  
59  
60

### ***Strengths and Weaknesses of this study***

This study included a feedback session where the researchers presented findings from analyzing the interviews to the full group of doctors working at the surgical department.

Both those who participated in interviews and several doctors who had not been interviewed, confirmed the researchers understanding of the local work situation. This is a study strength that substantiates the findings. It confirms, in line with Malterud <sup>46</sup>, that a limited number of information rich interviews can contribute with new meaningful knowledge.

Having an interdisciplinary research group with complimentary educational, research and work related experiences analyzing the interviews contributed to a multifaceted and nuanced understanding of the empirical information.

In this study we examine doctors' perceptions about their work situation, without observing their actual behaviour. A potential weakness concerns if the interviewed doctors described their actual reality. Previous research has found that what people present in interviews reflect their perceptions, and these perceptions also inform their actions<sup>43 74</sup>. By asking for clinical examples we also strove to ensure close proximity to the local situation.

While this study focused on a single surgical setting, we suggest that other health care settings can learn from this study. We base this notion of transferability on research showing communality among doctors across different contexts<sup>75</sup>, by some researchers called one occupational community of practice <sup>76</sup>.

## Conclusions

The interviewed doctors describe their struggle to balance the inherent tension among professional fulfillment, organizational factors and quality of patient care in their everyday work. They communicate how “stretching themselves”, to overcome organizational shortcomings, is no longer a feasible strategy without compromising both professional fulfillment and quality of patient care. Managers need to ensure that doctors are involved when developing organizational policies, processes and systems. By including doctors, the lived experience of the inherent tension among professional fulfillment, organizational factors and quality of patient care is used in a meaningful way to improve organizational factors. This is likely to be beneficial for both professional fulfillment and quality of patient care.

## Practice Implications

Healthcare management has a central role, and is responsible, for ensuring time and planned forums for doctors to engage and contribute in meaningful change. Engaging doctors in development work, also challenges historical management practices, as this requires organizational leaders to consider how psychological and social needs contributes to individual doctor engagement and well-being.

## Future research

This study has provided knowledge based on interviews with Norwegian doctors. It points to a need for future research to explore how the managerial side understands the interactions among professional fulfillment, organizational factors and quality of patient care.

1  
2  
3 Participatory interactive studies show positive effects from collecting doctors' experiences,  
4  
5 analyzing the empirical material and feeding it back in a consolidated and actionable form.  
6  
7

8 This external and structured view helps doctors and managers identify areas for local  
9  
10 organizational change and facilitates the active involvement of doctors in the change  
11  
12 process. There is a need for more research with participatory interactive methodologies.  
13  
14  
15

### 16 **Contributorship**

17  
18  
19 All four authors (FB, JR, BB, KIR) meet the conditions outlined in the ICMJE  
20  
21 recommendations and have all contributed in all dimensions.  
22  
23  
24

- 25 • Substantial contributions to the conception or design of the work, or the acquisition,  
26  
27 analysis or interpretation of data.
- 28 • Drafting the work or revising it critically for important intellectual content.
- 29 • Final approval of the version published.

30  
31  
32 Agreement to be accountable for all aspects of the work in ensuring that questions related  
33  
34 to the accuracy or integrity of any part of the work are appropriately investigated and  
35  
36 resolved. There is no one who fulfills the criteria that has been excluded as an author.  
37  
38  
39  
40  
41  
42  
43  
44

### 45 **Role of the Funding Source**

46  
47  
48 This work was supported by Den norske legeforenings fond for kvalitetsforbedring og  
49  
50 pasientsikkerhet (Norwegian Fund for Quality Improvements and Patient Safety) grant  
51  
52 number 16 / 5234. We confirm researcher independence from the funders and that all  
53  
54 authors had full access to all data in the study and can take responsibility for the integrity of  
55  
56 the data, the accuracy of the data analysis, results and conclusions.  
57  
58  
59  
60

### Conflicts of Interest

No competing interests exist for any of the researchers involved in this article.

### Transparency declaration

The lead author affirms that this manuscript is an honest, accurate, and transparent account of the study being reported; that no important aspects of the study have been omitted; and that any discrepancies from the study as planned have been explained.

### Data sharing Statement

Interview transcript are the empirical source. These are only for the assigned research group in order to honor the commitment with the participants.



## References

1. Berwick D. Crossing the boundary: changing mental models in the service of improvement. *Int J Qual Health Care* 1998;**10**(5):435-41.
2. Sikka R, Morath JM, Leape L. The Quadruple Aim: care, health, cost and meaning in work. *BMJ Qual Saf* 2015:bmjqs-2015-004160.
3. West CP. Physician Well-Being: Expanding the Triple Aim. *J Gen Intern Med* 2016:1-2.
4. Trockel M, Bohman B, Lesure E, et al. A Brief Instrument to Assess Both Burnout and Professional Fulfillment in Physicians: Reliability and Validity, Including Correlation with Self-Reported Medical Errors, in a Sample of Resident and Practicing Physicians. *Acad Psychiatry* 2018;**42**(1):11-24.
5. Bodenheimer T, Sinsky C. From Triple to Quadruple Aim: Care of the Patient Requires Care of the Provider. *Ann Fam Med* 2014;**12**(6):573-76.
6. Hussey PS, Wertheimer S, Mehrotra A. The association between health care quality and cost: a systematic review. *Ann Intern Med* 2013;**158**(1):27-34.
7. Leatt P, Baker GR, Halverson PK, et al. Downsizing, reengineering, and restructuring: long-term implications for healthcare organizations. *Front Health Serv Manage* 1997;**13**(4):3.
8. Bourbonnais R, Brisson C, Malenfant R, et al. Health care restructuring, work environment, and health of nurses. *Am J Ind Med* 2005;**47**(1):54-64.
9. Nordang K, Hall-Lord M-L, Farup PG. Burnout in health-care professionals during reorganizations and downsizing. A cohort study in nurses. *BMC Nurs* 2010;**9**(1):8.
10. McKinlay JB, Marceau L. New Wine in an Old Bottle: Does Alienation Provide an Explanation of the Origins of Physician Discontent? *Int J Health Serv* 2011;**41**(2):301-35.
11. Firth-Cozens J, Greenhalgh J. Doctors' perceptions of the links between stress and lowered clinical care. *Soc Sci Med* 1997;**44**(7):1017-22.
12. West CP, Tan AD, Habermann TM, et al. Association of resident fatigue and distress with perceived medical errors. *JAMA* 2009;**302**(12):1294-300.
13. Shanafelt TD, Bradley KA, Wipf JE, et al. Burnout and self-reported patient care in an internal medicine residency program. *Ann Intern Med* 2002;**136**(5):358-67.
14. Angerer P, Weigl M. Physicians' Psychosocial Work Conditions and Quality of Care: A Literature Review. *Professions and Professionalism* 2015;**5**(1).
15. Scheepers RA, Boerebach BCM, Arah OA, et al. A Systematic Review of the Impact of Physicians' Occupational Well-Being on the Quality of Patient Care. *Int J Behav Med* 2015;**22**(6):683-98.
16. Le Grand J. *Motivation, agency, and public policy: of knights and knaves, pawns and queens*: Oxford University Press on Demand, 2003.
17. Eijkenaar F, Emmert M, Scheppach M, et al. Effects of pay for performance in health care: a systematic review of systematic reviews. *Health Policy* 2013;**110**(2):115-30.
18. Lindgren Å, Bååthe F, Dellve L. Why risk professional fulfilment: a grounded theory of physician engagement in healthcare development. *Int J Health Plann Manage* 2013;**28**(2):e138-e57.
19. Khullar D, Chokshi DA, Kocher R, et al. Behavioral economics and physician compensation—promise and challenges. *N Engl J Med* 2015;**372**(24):2281-83.
20. Knorring Mv, Dept of Clinical N, Inst för klinisk n, et al. The manager role in relation to the medical profession, 2012.
21. Shanafelt TD, Gorringer G, Menaker R, et al. Impact of organizational leadership on physician burnout and satisfaction. *Mayo Clin Proc* 2015;**90**(4):432-40.
22. von Knorring M, Alexanderson K, Eliasson MA. Healthcare managers' construction of the manager role in relation to the medical profession. *J Health Organ Manag* 2016;**30**(3):421-40.
23. Baathe F, Norback LE. Engaging physicians in organisational improvement work. *J Health Organ Manag* 2013;**27**(4):479-97.

- 1
  - 2
  - 3
  - 4
  - 5
  - 6
  - 7
  - 8
  - 9
  - 10
  - 11
  - 12
  - 13
  - 14
  - 15
  - 16
  - 17
  - 18
  - 19
  - 20
  - 21
  - 22
  - 23
  - 24
  - 25
  - 26
  - 27
  - 28
  - 29
  - 30
  - 31
  - 32
  - 33
  - 34
  - 35
  - 36
  - 37
  - 38
  - 39
  - 40
  - 41
  - 42
  - 43
  - 44
  - 45
  - 46
  - 47
  - 48
  - 49
  - 50
  - 51
  - 52
  - 53
  - 54
  - 55
  - 56
  - 57
  - 58
  - 59
  - 60
24. Weigl M, Hornung S, Angerer P, et al. The effects of improving hospital physicians working conditions on patient care: a prospective, controlled intervention study. *BMC Health Serv Res* 2013;**13**(1):1.
25. Shanafelt TD, Noseworthy JH. Executive Leadership and Physician Well-being: Nine Organizational Strategies to Promote Engagement and Reduce Burnout. *Mayo Clin Proc* 2017;**92**(1):129-46.
26. Dickson G. Anchoring physician engagement in vision and values: principles and framework. Saskatchewan: Regina Qu'Appelle Health Region 2012.
27. Berwick DM, Nolan TW. Physicians as leaders in improving health care: a new series in *Annals of Internal Medicine*. *Ann Intern Med* 1998;**128**(4):289-92.
28. Kaissi A. Enhancing Physician Engagement: An International Perspective. *Int J Health Serv* 2014;**44**(3):567-92.
29. Bååthe F. Physicians' engagement: qualitative studies exploring physicians' experiences of engaging in improving clinical services and processes [Doctoral thesis,]. Sahlgrenska Academy at the University of Gothenburg, 2015.
30. Dyrbye LN, Trockel M, Frank E, et al. Development of a research agenda to identify evidence-based strategies to improve physician wellness and reduce burnout. *Ann Intern Med* 2017;**166**(10):743-44.
31. Sinsky CA, Willard-Grace R, Schutzbank AM, et al. In search of joy in practice: a report of 23 high-functioning primary care practices. *Ann Fam Med* 2013;**11**(3):272-78.
32. Bringedal B, B C. Styring for kvalitet og likebehandling. Norske legers syn på styringsinstrumentenes betydning. (Governance for quality and equity. Norwegian physicians' views on the effects of steering instruments.). In: Aasen B, et al., ed. *Prioritering, styring og likebehandling Utfordringer i norsk helsetjeneste*. Oslo: Cappelen Akademiske, 2018.
33. [The Health Services Campaign] Helsetjenesteaksjonen 2015 . . <http://helsetjenesteaksjonen.no/> (20.12.2018).
34. Nylenna M, Aasland O. Jobbtilfredshet blant norske leger [Job satisfaction among Norwegian doctors]. *Tidsskrift for Den norske legeforening* 2010;**130**(10):1028-31.
35. Casalino LP, Crosson FJ. Physician Satisfaction and Physician Well-Being: Should Anyone Care? 2015 2015;**5**(1).
36. Aasland OG, Rosta J, Nylenna M. Healthcare reforms and job satisfaction among doctors in Norway. *Scandinavian journal of public health* 2010;**38**(3):253-58.
37. Hertzberg TK, Skirbekk H, Tyssen R, et al. The hospital doctor of today-still continuously on duty. *Tidsskrift for den Norske laegeforening: tidsskrift for praktisk medicin, ny raeke* 2016;**136**(19):1635-38.
38. Aasland O, Rosta J. Hvordan har overlegene det? [The hospital consultant - how are they?] (In Norwegian). *Overlegen* 2011;**1**:47-55.
39. West CP, Dyrbye LN, Shanafelt TD. Physician burnout: contributors, consequences and solutions. *J Intern Med* 2018.
40. Patton MQ. *Qualitative research & evaluation methods*. London: SAGE, 2002.
41. Greenhalgh T, Robert G, Macfarlane F, et al. Diffusion of Innovations in Service Organizations: Systematic Review and Recommendations. *Milbank Q* 2004;**82**(4):581-629.
42. Ellström PE, Rönqvist D, Thunborg C. *Omvärld, verksamhet och förändrade kompetenskrav inom hälso- och sjukvården: en studie av föreställningar hos centrala aktörer inom ett landsting*: Linköpings universitet. Institutionen för pedagogik och psykologi, 1994.
43. Kvale S, Brinkmann S. *Den kvalitativa forskningsintervjun (The Qualitative Research Interview)*. Lund: Studentlitteratur, 2009.
44. Cooperrider D. The gift of new eyes: Personal reflections after 30 years of appreciative inquiry in organizational life. *Research in organizational change and development* 2017:81.

- 1
- 2
- 3
- 4 45. Miles MB, Huberman AM, Saldaña J. *Qualitative data analysis: A methods sourcebook*: SAGE Publications, Incorporated, 2013.
- 5
- 6 46. Malterud K, Siersma VD, Guassora AD. Sample Size in Qualitative Interview Studies Guided by
- 7 Information Power. *Qual Health Res* 2015;1049732315617444.
- 8 47. Miles MB, Huberman AM. *Qualitative data analysis : an expanded sourcebook*. Thousand Oaks,
- 9 CA: Sage, 1994.
- 10 48. World Medical Association. World medical association declaration of helsinki: Ethical principles
- 11 for medical research involving human subjects. *JAMA* 2013;**310**(20):2191-94.
- 12 49. Helse- og omsorgsdepartementet. Lov om medisinsk og helsefaglig forskning
- 13 (helseforskningsloven) <https://lovdata.no/dokument/NL/lov/2008-06-20-44>. LOV-2008-06-
- 14 20-44.
- 15 50. Edwards N, Kornacki MJ, Silversin J. Unhappy doctors: what are the causes and what can be
- 16 done? *BMJ* 2002;**324**(7341):835-38.
- 17 51. Royal College of Physicians. Doctors in society: medical professionalism in a changing world.
- 18 Report of a Working Party of the Royal College of Physicians of London. London: RCP, 2005,
- 19 2005.
- 20 52. Cruess RL, Cruess SR, Boudreau JD, et al. A Schematic Representation of the Professional Identity
- 21 Formation and Socialization of Medical Students and Residents: A Guide for Medical
- 22 Educators. *Acad Med* 2015;1.
- 23 53. Bailey C, Madden A. What Makes Work Meaningful -- Or Meaningless. *MIT Sloan Management*
- 24 *Review* 2016;**57**(4):53-61.
- 25 54. Dyrbye LN, Shanafelt TD, Sinsky CA, et al. Burnout among health care professionals: A call to
- 26 explore and address this underrecognized threat to safe, high-quality care. *NAM (National*
- 27 *Academy of Medicine) Perspective* 2017.
- 28 55. Friedberg MW, Chen PG, Van Busum KR, et al. *Factors affecting physician professional*
- 29 *satisfaction and their implications for patient care, health systems, and health policy*: RAND
- 30 corporation, 2013.
- 31 56. Wallace J, Lemaire J, Ghali W. Physician wellness: a missing quality indicator. *The Lancet*
- 32 2009;**374**(9702):1714-21.
- 33 57. Diderichsen S. It's just a job: a new generation of physicians dealing with career and work ideals.
- 34 Umeå universitet, 2017.
- 35 58. Hertzberg TK, Isaksson Rø K, Vaglum P, et al. Work-home interface stress: an important predictor
- 36 of emotional exhaustion 15 years into a medical career. *Ind Health* 2016;**54**(2):139-48.
- 37 59. Hamilton C. Downshifting in Britain. A sea-change in the pursuit of happiness 2003;**2**.
- 38 60. Bovier PA, Perneger TV. Predictors of work satisfaction among physicians. *Eur J Public Health*
- 39 2003;**13**(4):299-305.
- 40 61. West CP, Huschka MM, Novotny PJ, et al. Association of perceived medical errors with resident
- 41 distress and empathy: A prospective longitudinal study. *JAMA* 2006;**296**(9):1071-78.
- 42 62. Bliss M. *William Osler: a life in medicine*. . New York: Oxford University Press, 1999.
- 43 63. Parsa-Parsi R. The revised declaration of geneva: A modern-day physician's pledge. *JAMA*
- 44 2017;**318**(20):1971-72.
- 45 64. Bååthe F, Erik Norbäck L. Engaging physicians in organisational improvement work. *J Health*
- 46 *Organ Manag* 2013;**27**(4):479-97.
- 47 65. Lee TH, Cosgrove T. Engaging doctors in the health care revolution. United States: Harvard
- 48 Business School Publ. Corp, 2014:104-11.
- 49 66. Davies H, Powell A, Rushmer R. Why don't clinicians engage with quality improvement? *J Health*
- 50 *Serv Res Policy* 2007;**12**(3):129-30.
- 51 67. Swensen S, Kabcenell A. Physician-Organization Collaboration Reduces Physician Burnout and
- 52 Promotes Engagement: The Mayo Clinic Experience. *J Healthc Manag* 2016;**61**(2):105-27
- 53 23p.
- 54
- 55
- 56
- 57
- 58
- 59
- 60

- 1  
2  
3 68. Stacey R. *The Tools and Techniques of Leadership and Management: Meeting the challenge of*  
4 *complexity*. London: Routledge, 2012.  
5 69. Stacey RD, Mowles C. *Strategic management and organisational dynamics: the challenge of*  
6 *complexity to ways of thinking about organisations*. Harlow, United Kingdom: Pearson  
7 Education, 2016.  
8 70. Swensen SJ, Shanafelt T. An Organizational Framework to Reduce Professional Burnout and Bring  
9 Back Joy in Practice. *Joint Commission journal on quality and patient safety* 2017;**43**(6):308-  
10 13.  
11 71. Herzberg F. One more time: How do you motivate employees: Harvard Business Review Boston,  
12 MA, 1968.  
13 72. Ryan RM, Deci EL. Self-Determination Theory and the Facilitation of Intrinsic Motivation, Social  
14 Development, and Well-Being. *Am Psychol* 2000;**55**(1):68-78.  
15 73. Baathe F, Ahlborg Jr G, Lagström A, et al. Physician experiences of patient-centered and team-  
16 based ward rounding—an interview based case-study. *J Hosp Adm* 2014;**3**(6):p127.  
17 74. Czarniawska B. *Narratives in social science research*. London: SAGE, 2004.  
18 75. Van Maanen J, Barley SR. Occupational communities: culture and control in organizations. *Res*  
19 *Organ Behav*, 1984:287-365.  
20 76. Wenger E. Communities of Practice and Social Learning Systems. *Organization* 2000;**7**(2):225-46.  
21  
22  
23  
24  
25  
26  
27  
28  
29  
30  
31  
32  
33  
34  
35  
36  
37  
38  
39  
40  
41  
42  
43  
44  
45  
46  
47  
48  
49  
50  
51  
52  
53  
54  
55  
56  
57  
58  
59  
60

1  
2  
3  
4  
5  
6  
7  
8  
9  
10  
11  
12  
13  
14  
15  
16  
17  
18  
19  
20  
21  
22  
23  
24  
25  
26  
27  
28  
29  
30  
31  
32  
33  
34  
35  
36  
37  
38  
39  
40  
41  
42  
43  
44  
45  
46  
47  
48  
49  
50  
51  
52  
53  
54  
55  
56  
57  
58  
59  
60



Figure 1. Conceptual model used in the interview situation

338x190mm (96 x 96 DPI)

## Interview guide:

- Describe your role as physician here at the hospital
  - Position, seniority (consultant, resident, intern), specialty/sub-specialty, researcher
- Describe a day when you go home happy/satisfied/content with your workday
  - Describe another day when you go home and are not happy/satisfied/content
    - What are your thoughts about what it is that makes the difference?
- What are your experiences from the interactions between physician's professional fulfillment/satisfaction, organizational factors and quality of patient care?
  - Are there any challenges where you work today in relation to these interactions?
    - Examples from own individual experiences preferred
    - From your own experiences and reflections – what are perspectives that would benefit from being improved?
      - How does this relate to your own professional fulfillment/satisfaction?
      - How does this relate to quality of patient care?
      - Is it measured per today? How would you go about to measure this?
- Which of the targets and measurements that your department follow are you aware of?
  - Are any of these really important for you/ that you actively track and follow?
  - Are there other measurements you would appreciate to follow?
- Do you experience that the organization is supportive and facilitates for you to come up with suggestions for improvements?
  - When was the last time you had an idea/suggestion for improvement? (concrete example)
    - How did you go about to get support and initiate change based upon your idea/suggestion?
    - Has your idea/suggestion become reality?
  - From your own experience, what can be done, if anything, to further facilitate for new ideas to improve clinical practice?
- If you were the Head of the Department or Hospital Director are there things you would really want to pay additional attention to?
- Are there other questions you would have wanted us to ask, in relation to this research area?

**Much appreciate your time and effort in participating!**



**LEFO**

Institute for Studies of  
the Medical Profession

## Standards for reporting Qualitative Research (SRQR \*)

| No.                       | Topic                                                                                        | Item found at page     |
|---------------------------|----------------------------------------------------------------------------------------------|------------------------|
| <b>Title and Abstract</b> |                                                                                              |                        |
| S1                        | Title                                                                                        | 1                      |
| S2                        | Abstract                                                                                     | 1                      |
| <b>Introduction</b>       |                                                                                              |                        |
| S3                        | Problem formulation                                                                          | 2                      |
| S4                        | Purpose or research question                                                                 | 3                      |
| <b>Methods</b>            |                                                                                              |                        |
| S5                        | Qualitative approach and research paradigm                                                   | 3                      |
| S6                        | Researcher characteristics and reflexivity                                                   | 5                      |
| S7                        | Context                                                                                      | 4                      |
| S8                        | Sampling strategy                                                                            | 5                      |
| S9                        | Ethical issues pertaining to human subjects                                                  | 5                      |
| S10                       | Data collection methods                                                                      | 5                      |
| S11                       | Data collection instruments and technologies                                                 | 5                      |
| S12                       | Units of study                                                                               | 5                      |
| S13                       | Data processing                                                                              | 5                      |
| S14                       | Data analysis                                                                                | 5                      |
| S15                       | Technique to enhance trustworthiness                                                         | 3, 5, 11               |
| <b>Results/Findings</b>   |                                                                                              |                        |
| S16                       | Synthesis and interpretation                                                                 | 6,7,8,9,10             |
| S17                       | Links to empirical data                                                                      | 6,7,8,9,10             |
| <b>Discussion</b>         |                                                                                              |                        |
| S18                       | Integration with prior work, implications, transferability, and contribution(s) to the field | 11, 12, 13, 14, 15, 16 |
| S19                       | Limitations                                                                                  | 10                     |
| <b>Other</b>              |                                                                                              |                        |
| S20                       | Conflicts of interest                                                                        | 17                     |
| S21                       | Funding                                                                                      | 17                     |

\* **Standards for Reporting Qualitative Research: A Synthesis of Recommendations.**

O'Brien, Bridget; Harris, Ilene; Beckman, Thomas; Reed, Darcy; MD, MPH; Cook, David; MD, MHP

Academic Medicine. 89(9):1245-1251, September 2014.

DOI: 10.1097/ACM.0000000000000388

1  
2  
3  
4  
5  
6  
7  
8  
9  
10  
11  
12  
13  
14  
15  
16  
17  
18  
19  
20  
21  
22  
23  
24  
25  
26  
27  
28  
29  
30  
31  
32  
33  
34  
35  
36  
37  
38  
39  
40  
41  
42  
43  
44  
45  
46  
47  
48  
49  
50  
51  
52  
53  
54  
55  
56  
57  
58  
59  
60

For peer review only

'E



# BMJ Open

## How do doctors experience the interactions among professional fulfillment, organizational factors and quality of patient care? A qualitative study in a Norwegian hospital

|                                 |                                                                                                                                                                                                                                                                                                                                |
|---------------------------------|--------------------------------------------------------------------------------------------------------------------------------------------------------------------------------------------------------------------------------------------------------------------------------------------------------------------------------|
| Journal:                        | <i>BMJ Open</i>                                                                                                                                                                                                                                                                                                                |
| Manuscript ID                   | bmjopen-2018-026971.R3                                                                                                                                                                                                                                                                                                         |
| Article Type:                   | Research                                                                                                                                                                                                                                                                                                                       |
| Date Submitted by the Author:   | 12-Apr-2019                                                                                                                                                                                                                                                                                                                    |
| Complete List of Authors:       | Bååthe, Fredrik; LEFO - Institute for studies of the medical profession; Institutet for stressmedicin, Rosta, Judith; LEFO - Institute for studies of the medical profession<br>Bringedal, Berit ; LEFO - Institute for studies of the medical profession<br>Rø, Karin; LEFO - Institute for studies of the medical profession |
| <b>Primary Subject Heading</b>: | Qualitative research                                                                                                                                                                                                                                                                                                           |
| Secondary Subject Heading:      | Health services research, Medical management, Health policy, Evidence based practice, Communication                                                                                                                                                                                                                            |
| Keywords:                       | HEALTH SERVICES ADMINISTRATION & MANAGEMENT, EDUCATION & TRAINING (see Medical Education & Training), ETHICS (see Medical Ethics), PREVENTIVE MEDICINE, QUALITATIVE RESEARCH                                                                                                                                                   |
|                                 |                                                                                                                                                                                                                                                                                                                                |

SCHOLARONE™  
Manuscripts

1  
2  
3 **How do doctors experience the interactions among professional fulfillment, organizational**  
4 **factors and quality of patient care? A qualitative study in a Norwegian hospital**  
5  
6  
7  
8

---

9 Authors: Fredrik Bååthe, Judith Rosta, Berit Bringedal, Karin Isaksson Rø

10  
11 Corresponding author: Fredrik Bååthe, Beckasinvägen 2, 42933 Kullavik, Sweden,  
12 fredrik.baathe@vgregion.se, +46736601710  
13

14  
15 Fredrik Bååthe,  
16 LEFO -Institute for Studies of the Medical Profession, LEFO, Oslo, Norway;  
17 Sahlgrenska Academy at Gothenburg University, Sweden;  
18 Sahlgrenska University Hospital, Gothenburg, Sweden;  
19 Institute of Stressmedicin, Region Västra Götaland, Sweden  
20

21 Judith Rosta  
22 LEFO - Institute for Studies of the Medical Profession, Oslo, Norway  
23

24  
25 Berit Bringedal  
26 LEFO - Institute for Studies of the Medical Profession, Oslo, Norway  
27

28 Karin Isaksson Rø,  
29 LEFO - Institute for Studies of the Medical Profession, Oslo, Norway;  
30 Dept. of Behavioural Sciences in Medicine, Institute of Basic Medical Sciences, Medical Faculty,  
31 University of Oslo  
32

33  
34 Keywords: Physician, professional fulfillment, satisfaction, quality of patient care, organization  
35

36 5997 words  
37  
38  
39  
40  
41  
42  
43  
44  
45  
46  
47  
48  
49  
50  
51  
52  
53  
54  
55  
56  
57  
58  
59  
60

1  
2  
3 **Objectives:** Doctors increasingly experience high levels of burnout and loss of engagement. To  
4 address this there is a need to better understand doctors work situation. This study explores how  
5 doctors experience the interactions among professional fulfillment, organizational factors and  
6 quality of patient care.  
7  
8  
9

10  
11  
12  
13 **Design:** An exploratory qualitative study design with semi-structured individual interviews was  
14 chosen. Interviews were transcribed verbatim and analyzed by a transdisciplinary research group.  
15

16  
17 **Setting:** The study focused on a surgical department of a mid-sized hospital in Norway  
18

19  
20 **Participants:** Seven doctors were interviewed. A purposeful sampling was used with gender and  
21 seniority as selection criteria. Three senior doctors (two female, one male) and four in training (three  
22 male, one female) were interviewed.  
23  
24  
25

26  
27 **Results:** We found that in order to provide quality care to the patients, individual doctors described  
28 “stretching themselves” i.e. handling the tensions between quantity and quality, to overcome  
29 organizational shortcomings. Experiencing a workplace emphasis on production numbers and  
30 budget concerns led to feelings of estrangement among the doctors. Participants reported a shift  
31 from serving as trustworthy, autonomous professionals to becoming production workers, where  
32 professional identity was threatened. They felt less aligned with work-place values, in addition to  
33 experiencing limited management recognition for quality of patient care. Management initiatives to  
34 include doctors in development of organizational policies, processes and systems were sparse.  
35  
36  
37  
38  
39  
40  
41  
42  
43

44 **Conclusion:** The interviewed doctors described their struggle to balance the inherent tension among  
45 professional fulfillment, organizational factors and quality of patient care in their everyday work.  
46 They communicated how “stretching themselves”, to overcome organizational shortcomings, is no  
47 longer a feasible strategy without compromising both professional fulfillment and quality of patient  
48 care. Managers need to ensure that doctors are involved when developing organizational policies,  
49 processes and systems. This is likely to be beneficial for both professional fulfillment and quality of  
50 patient care.  
51  
52  
53  
54  
55  
56  
57  
58  
59  
60

### Strengths and limitations of this study

In this exploratory study, given our priority to capture in-depth, nuanced aspects, individual doctor interviews were given priority over the potentially higher number of participants that could have been included in group interviews. The interdisciplinary research group, conducting the analytical work, further provides a methodological basis to find a rich interpretation towards an empirically grounded doctors' voice.

This study has a potential limitation in that the empirical material was based on interviews with only seven doctors (this represented about 30% of the doctors working at the department). In order to capture input also from doctors not being interviewed a feedback session was included, where the researchers presented tentative findings to the larger group of doctors at the department. Both those who participated in interviews and several doctors who had not been interviewed, confirmed the researchers understanding of the local work situation. This substantiates the findings.

Transferability of this study with a small sample of doctors from a hospital is not claimed; however, being consistent with previous research, our study findings can be useful to healthcare delivery organizations experiencing similar challenges in their specific context.

## Introduction

High-quality health care depends not only on high-tech equipment, sufficient resources and reliable evidence, but also on health professionals who are engaged and find meaning with their work. Researchers have recently argued for expanding the traditional health care improvement goals. In addition to enhancing patient treatment, securing the population's health and reducing the per capita cost of health care <sup>1</sup>, they argue for promoting professional fulfillment<sup>2-4</sup>. Bodenheimer and Sinsky expressed this succinctly as, "care of the patient requires care of the provider" <sup>5</sup>.

In order to improve quality of care, while containing costs, and promoting professional fulfillment we seem to need additional knowledge. A review from 2013 found that 70% of interventions aiming to improve quality and reduce health care costs did not succeed in doing both<sup>6</sup>. Common strategies were hospital or department mergers and downsizing, without attaining increased quality<sup>7</sup> and leading to negative effects for work environment as well as increased stress, burnout and feelings of alienation among employees <sup>8-10</sup>.

Several studies have explored the links between professional fulfilment and different measures of quality of care (both as perceived by doctors themselves or more objectively measured in relation to treatment outcomes or patient complaints) <sup>11-15</sup>. Other studies have explored the relationships between different organizational factors and how they influence professional behavior, motivation, engagement and satisfaction<sup>16-22</sup>. Only few studies have studied the dynamic interaction among all three dimensions - organizational factors, quality of patient care and professional fulfillment <sup>23-25</sup>. Although these studies indicate the importance of doctors' active involvement in change processes, research informs us that such engagement is limited<sup>26-29</sup>. We need to understand more about these relationships. To

1  
2  
3 better care for the providers, a better understanding of the interactions among professional  
4 fulfillment, quality of patient care and organizational factors is needed<sup>30</sup>. There seems to be  
5  
6 a call for research to provide more practice-informed and actionable knowledge to facilitate  
7  
8 local workplace development<sup>30 31</sup>.  
9  
10

11  
12  
13 In Norway, as in other countries, recent decades have seen a stronger emphasis on budget  
14 control and value for money. A number of reforms are implemented, all with the intention  
15  
16 to improve quality, reduce waste, and lead to better priorities. The many reforms and  
17  
18 increased focus on budget constraints seem to have led to some skepticism among  
19  
20 doctors<sup>32</sup>. Norwegian doctors have expressed their worries about maintaining the quality of  
21  
22 care through the many reforms and changes<sup>33</sup>  
23  
24  
25

26  
27  
28 The Norwegian health care system is a single payer, universal coverage system, funded by  
29  
30 the State. Hospital care is organized as regional trusts with independent boards. Yearly  
31  
32 contracts are made with the Ministry of Health. Primary care is organized with independent  
33  
34 contractors to the health care system. GPs are gatekeepers to specialist care and patients  
35  
36 need to first meet with a GP before having access to specialist care. Patients incur a nominal  
37  
38 co-payment when receiving care services and the bulk of the funding comes from the State.  
39  
40 Although doctors in Norway<sup>34</sup> (as in other Western countries<sup>35</sup>) have high scores on work  
41  
42 satisfaction, there is a clear difference between specialties. Community doctors and general  
43  
44 practitioners scored highest and doctors in surgical disciplines lowest<sup>36</sup>. Qualitative  
45  
46 interviews of hospital doctors have found that surgeons, as one of three specialties,  
47  
48 experience conflicts between adhering to their views of what a good doctor is/does and the  
49  
50 consequences this has for the interaction with healthcare leaders, their colleagues and for  
51  
52 the balance between work and home<sup>37</sup>. In 2008 more than 30% of senior and 18% of junior  
53  
54  
55  
56  
57  
58  
59  
60

1  
2  
3 hospital doctors reported working under "unacceptably" high rates of stress fairly often or  
4  
5 often and over 75% of hospital doctors reported fairly or very high stress related to frequent  
6  
7 reorganizations<sup>38</sup>.  
8  
9

10  
11 Thus, exploring how Norwegian doctors understand the relationships among organizational  
12  
13 factors, professional fulfillment and quality of patient care will inform and support  
14  
15 commensurate interventions toward improving doctors' well-being and the quality of  
16  
17 patient care<sup>39</sup>.  
18  
19

### 20 21 **Aim**

22  
23  
24 The study aims to explore how doctors experience the interactions among professional  
25  
26 fulfillment, organizational factors and quality of patient care.  
27  
28  
29

### 30 31 **Methods**

#### 32 33 **Design**

34  
35 An exploratory qualitative study design was chosen. Such a design is appropriate when  
36  
37 there is limited knowledge<sup>40</sup>. This study was conducted as the first part of a multi-year and  
38  
39 multi-site interactive<sup>41 42</sup> research project, interviewing doctors from two hospitals in  
40  
41 Norway and one in the USA. This article focuses on the first set of doctor interviews from  
42  
43 one of the Norwegian hospitals.  
44  
45  
46  
47  
48

#### 49 50 **Setting**

51  
52 The study was done in a mid-sized emergency hospital in Norway. The hospital provides  
53  
54 medical, surgical and psychiatric care with approximately 1,400 employees who serve a  
55  
56 population of about 135,000. This is also a teaching hospital for doctors and nurses. The  
57  
58 hospital has, during the last years, reorganized the executive leaders and engaged in a  
59  
60

1  
2  
3 hospital wide leadership development program to create alignment with how new societal  
4 requirements are integrated and to facilitate improvements of managerial processes and  
5  
6 processes impacting quality of patient care.  
7  
8  
9

10  
11 Following a presentation about the study to the hospital management, the researchers  
12  
13 received approval to approach department managers. The study's aim and interactive study  
14  
15 concept were presented to the group of doctors and head of the department. Following an  
16  
17 internal discussion, the surgical department agreed to participate. Both doctors and the  
18  
19 leader of the surgical department expressed appreciation of the cooperative aspects of the  
20  
21 study and the explicit intent to listen to doctors' voices about their local situation.  
22  
23  
24  
25

### 26 ***Participants***

27  
28  
29 The participating surgical department asked us to work with a small study population in  
30  
31 order to minimize time conflict with doctors' clinical work, without compromising the  
32  
33 quality of the study. Based on experience from the research field and from interviewing  
34  
35 doctors in other hospital settings we agreed on a minimum number of seven doctors. This is  
36  
37 about a third of all doctors at the department. For the most effective use of the limited  
38  
39 resources we used a purposeful sampling, which is a widely used technique for identification  
40  
41 and selection of information rich cases<sup>40</sup>. Gender and seniority were used as selection  
42  
43  
44 criteria to provide maximum variation<sup>43</sup> in the empirical material. Three participants were  
45  
46 senior doctors (two female, one male) and four were in training (three male, one female).  
47  
48  
49  
50  
51  
52  
53  
54

### 55 ***Data Collection***

56  
57  
58  
59  
60



1  
2  
3 Data was collected via individual interviews. A semi-structured interview guide was used to  
4 facilitate consistency between interviews<sup>40</sup>. The questions were inspired by the quadruple  
5 aim<sup>5</sup> and Appreciative Inquiry<sup>44</sup>. The interview guide was initially developed by FB. It was  
6 then tested on KIR for readability and clarity. After adjustments and a new test with  
7 evaluation it was accepted. All interviews were done in the local language. We constructed  
8 open-ended questions to allow the respondent to tell their own story<sup>45</sup>. Each interview  
9 started with questions about number of years working as a doctor and the current position.  
10 Then the respondents were asked to describe a day when they felt satisfied or fulfilled at  
11 work, and a day when they did not. After this they were asked to reflect on the relationships  
12 among professional fulfillment, quality of patient care and organizational factors. To be  
13 consistent when introducing this question the respondents were shown a conceptual model  
14 (figure 1). Each doctor received a written and oral description of the study before signing  
15 the written consent and before the interview started. An interview guide, translated into  
16 English, is available as Appendix 1.

17  
18  
19  
20  
21  
22  
23  
24  
25  
26  
27  
28  
29  
30  
31  
32  
33  
34  
35  
36  
37  
38 [Figure 1 here]

39  
40 **Figure 1.** Conceptual framework used in the interview situation

41  
42  
43 The individual doctor interviews were conducted in November and December 2016.

44  
45 Interviews took place in a conference facility in the hospital area and were digitally  
46 recorded. Each interview was scheduled to last 60 minutes. The researchers allowed  
47 participants to use more time in order to provide information richness, given the limited  
48 numbers of interviews. This resulted in an average interview time of 74 minutes.

49  
50  
51 In order to capture rich information from this small number of participants<sup>46</sup> we were two  
52 experienced researchers with complementary experience participating in every interview,  
53  
54  
55  
56  
57  
58  
59  
60

1  
2  
3 but one. During the interview one researcher was leading while the other listened and took  
4  
5 extensive notes, occasionally interacting to further probe interesting aspects relating to the  
6  
7 study aim. Both researchers (PhD) had solid experience with physician interviews and knew  
8  
9 the research field well. One interviewer (KIR) has a background as an occupational physician  
10  
11 and many years of experience counseling doctors both individually and in groups. The other  
12  
13 interviewer (FB) has a professional background as department head at a university hospital,  
14  
15 working with organizational development for many years, educational background from  
16  
17 industrial engineering and management and consultant level training in group relations  
18  
19 theory.  
20  
21  
22  
23  
24  
25

### 26 ***Analysis***

27  
28 To provide for a multifaceted interpretation of the empirical material, the analytical process  
29  
30 involved a team of four researchers with complimentary experiences. In addition to those  
31  
32 two who conducted the interviews, a senior researcher (PhD) with experience in  
33  
34 epidemiology and with professional background in surgical nursing took part (JR), as well as  
35  
36 a senior health care researcher with a PhD in sociology (BB).  
37  
38  
39  
40  
41  
42  
43

44 The analytical process started with a tentative analysis to capture the main content from the  
45  
46 interviews. The two interviewers (FB+KIR) went through their notes and impressions from  
47  
48 the interviews and started to create an overarching understanding. JR listened to all audio  
49  
50 recordings and made notes with the targeted task to ask the material two key questions:  
51  
52 What is the most pressing problem? What do they do to handle/solve this problem? BB  
53  
54 listened to most of the interviews and made notes about her first impressions. The research  
55  
56 group then met and compared initial notes. This first step provided an overall perspective  
57  
58  
59  
60

1  
2  
3 that was presented back to the department to allow them to react to it. This material  
4  
5 provided good resonance with the participants, and also with the other doctors who were  
6  
7 present in the meeting but had not been interviewed. Also the head of the department  
8  
9 confirmed that what the researcher presented back to the department was in line with his  
10  
11 understanding.  
12  
13

14  
15 The more developed analytical process was guided by Miles and Huberman<sup>47</sup> and was done  
16  
17 without specific analytical software. All interviews were transcribed verbatim in the local  
18  
19 language. Based on the study aim, the interviews were read individually to capture words  
20  
21 and sentences, meaning units, which showed similarities in terms of content. These  
22  
23 meaning units were condensed and labeled with a descriptive code close to the textual  
24  
25 meaning. Sometimes these codes were in English and sometimes they were in the local  
26  
27 language. The research group met and each person presented their descriptive coding.  
28  
29 Mostly there was congruence. When congruence was not experienced, face to face  
30  
31 conversations were carried out to challenge each other's perspective. Sometimes these  
32  
33 conversations went back to the original text to find a common ground and interpretation,  
34  
35 before moving on. The researchers then worked to group the descriptive codes, and related  
36  
37 meaning units, based on the ones having similar content. Each grouping received a tentative  
38  
39 descriptive header. Once this was in place, two alternative routes of further sorting and  
40  
41 abstraction were followed in a comprehensive analysis of the content. One was to use the  
42  
43 conceptual framework from the interview (Fig 1) and organize the different groupings in  
44  
45 relation to if it concerned professional fulfillment, organizational factors or quality of patient  
46  
47 care. This process created, at first, an experience of structure and cleanliness, but over time  
48  
49 provided a blurred result, with a residual of empirical material that fitted in any or all of the  
50  
51 three aspects. The other analytical route was to look for groupings that could be combined  
52  
53  
54  
55  
56  
57  
58  
59  
60

1  
2  
3 with only slightly broadening or altering the content, as symbolized by an adjustment of the  
4  
5  
6 descriptive header. This iterative process eventually contributed to form five empirical  
7  
8 themes that integrated all interview material into a comprehensive understanding.  
9

10 Quotations are used in the result section to allow individual doctor voices to illustrate a  
11  
12  
13 central content<sup>45</sup>.  
14  
15  
16

17  
18 The interdisciplinary group of authors worked both individually and in a group to enrich the  
19  
20 empirical interpretations and reduce the risk of any author overpowering the empirical  
21  
22 material of doctors' voices. During the analytical process we paid extra attention if we found  
23  
24 data that did not fit with the other data, indicating there were some empirical nuances we  
25  
26 were missing with our small sample of seven doctors. This did not happen and regardless of  
27  
28 gender or seniority there was a high degree of commonality between the different doctor  
29  
30 voices relating to the aim. During the analyses it became clear that the seven information  
31  
32 rich cases enabled a comprehensive understanding. It confirms, what Malterud<sup>46</sup> suggests,  
33  
34 that a limited number of information rich interviews can contribute with new meaningful  
35  
36 knowledge. During the analytical process alternative interpretations were continuously  
37  
38 sought through critical reflections and ongoing conversations during face-to-face meetings.  
39  
40 This process continued iteratively until alternative understandings and considerations were  
41  
42 reconciled into a coherent result. Patton suggests that this type of research group  
43  
44 triangulation is a way to reach comprehensive, robust and well-developed findings from a  
45  
46 rich empirical material <sup>40</sup>.  
47  
48  
49  
50  
51  
52  
53

#### 54 ***Ethics***

55  
56  
57  
58  
59  
60

1  
2  
3 This study followed the World Medical Association's Declaration of Helsinki <sup>48</sup>. The risk of  
4  
5 harm to the participants was very low, and thus the project did not meet the criteria  
6  
7  
8 justifying a formal application to the ethics board, consistent with Norwegian law <sup>49</sup>.  
9

### 10 ***Patient and Public Involvement***

11  
12  
13 Patients and the public were not involved in the design or planning of the study.  
14  
15  
16  
17  
18  
19  
20  
21  
22  
23  
24  
25  
26  
27  
28  
29  
30  
31  
32  
33  
34  
35  
36  
37  
38  
39  
40  
41  
42  
43  
44  
45  
46  
47  
48  
49  
50  
51  
52  
53  
54  
55  
56  
57  
58  
59  
60

For peer review only

## Results

Analyzing the interviewed doctors' experiences about the interactions among professional fulfillment, organizational factors and quality of patient care, resulted in an empirically grounded understanding with the following themes. (Quotes from participant are used to provide the original voice. Each doctor is assigned a random letter for anonymity.)

### ***Quality of patient care crowded out by production numbers and economic data***

Many doctors talked about how conversations at department meetings had changed. Previously, they were more about quality of clinical care, while now they mostly focused on the need to meet production targets and finding ways to handle budgetary constraints. The participant expressed how quality was starting to be experienced as an empty phrase, crowded out by production numbers and economic concerns.

*Quality is more and more becoming an empty term in relation to what the hospital values are. What we hear about is mostly money issues and production numbers. (Doctor A)*

Changes in workplace conversations, combined with an experience of limited recognition for good professional work, made some doctors express that they did not really "recognize the workplace". Some of them also expressed concerns about who they were becoming, in their role as doctors. One doctor experienced a change from being a trustworthy and autonomous professional, to becoming more of a production worker.

*I don't feel that I come to work as a capable and autonomous resource anymore. I feel I come to work only to produce a certain number of procedures. (Doctor B)*

1  
2  
3 While the interviewed doctors all appreciated swift and smooth operations, a new operating  
4 concept, with the explicit aim to increase output, troubled some. They expressed concerns  
5 about potential risks of patient complications since the allotted time was too limited to find  
6 anatomical landmarks and stop minor bleeding before proceeding to the next surgical step.  
7  
8 With a dominating focus on quantity, there was an emergent worry as to whether individual  
9 quality standards were compromised.  
10  
11  
12  
13  
14  
15  
16

17  
18 *Maybe the key dilemma is that you are pushed for quantity all the time. It*  
19 *leads you to start to feel, right after you go home from your on-call work,*  
20 *that you did not finish your task or finalize things the way you wanted to.*  
21 *You get pushed to increase quantity and it is affecting your own reference*  
22 *of good-quality work. (Doctor C)*  
23  
24  
25  
26  
27  
28  
29  
30

31 The participants expressed unease about conversations focusing more on cost and  
32 production than quality, but at the same time there was an awareness of the necessity of  
33 high productivity and cost control.  
34  
35  
36  
37  
38

39 *I am one of those doctors who consider that health care has an obligation*  
40 *to make sure we manage our resources and household with our tax-based*  
41 *money. (Doctor D)*  
42  
43  
44  
45  
46  
47

### 48 **“Stretching oneself” to deliver quality of patient care despite organizational shortcomings**

49

50 The participants emphasized the importance of delivering good quality care, even if it meant  
51 “stretching themselves” to overcome hindering organizational factors. The expression  
52 “stretching themselves” is a descriptive term arising from the empirical analysis. It is used to  
53 capture the experience that an individual doctor had to find workarounds, which often  
54  
55  
56  
57  
58  
59  
60

1  
2  
3 involved overextending oneself, to balance the tension between production quantity versus  
4  
5 quality, but also handling sudden resource shortages (“due to illness you now also need to  
6  
7 handle the ward in between doing your surgical cases”), and balancing the potential tension  
8  
9 between work and home. This way of ensuring quality of patient care was considered  
10  
11 common practice. However, several doctors had begun to wonder whether the individual  
12  
13 work-arounds could have negative consequences for the quality of patient care.  
14  
15

16  
17  
18 *One starts to wonder if this constant stretching of oneself can have*  
19  
20 *negative consequences. Like more patients expressing worries after their*  
21  
22 *operations. (Doctor E)*  
23  
24  
25

26  
27 One example of an organizational shortcoming concerned unforeseen variations in the daily  
28  
29 operating schedule. This could result in long work hours for the doctors, impinging on the  
30  
31 work-home balance. Another dimension of stretching relates to a so-called “contract of  
32  
33 conscience”. This was not a formal contract, but rather related to their professional identity  
34  
35 as doctors. The “contract” was driving them to further stretch themselves and spend  
36  
37 considerable time at work, on top of normal duties.  
38  
39  
40

41  
42 *I have to be there until the operation is finished. I am really concerned*  
43  
44 *whether I will be in time for kindergarten. It generates a lot of frustration,*  
45  
46 *but I have an implicit contract with the patient and also to the hospital to*  
47  
48 *make sure the operation is carried through. (Doctor E)*  
49  
50  
51

### 52 ***The accelerating struggle against time impacting well-being and quality of patient care***

53

54  
55 The struggle against time was a main concern in the interviews and the participants  
56  
57 experienced that it influenced their overall well-being.  
58  
59  
60



1  
2  
3 *Suddenly you have one of these time and task collisions and it increases*  
4 *work strain and stress, impacting physical and mental health. You know,*  
5 *when you are expected to be in three places at once, it sort of triggers your*  
6 *stress level. (Doctor C)*  
7  
8  
9  
10  
11  
12

13 The participants felt uncomfortable with an increasing number of time and task collisions  
14 and expressed concerns that this constant battle against time could jeopardize the quality of  
15 patient care.  
16  
17  
18  
19

20  
21 *There is a constant battle against time. We need time to make solid*  
22 *evaluations before and after operations. We are pushing the limits*  
23 *towards feeling uncomfortable. Definitely relating to quality of care.*  
24  
25  
26  
27  
28  
29 *(Doctor A)*  
30  
31

32 There were also experiences of stress in the operating room, a work place sanctuary where  
33 surgeons previously experienced that time was allowed to “stand still”.  
34  
35  
36

37  
38 *Over the last years, operating programs have expanded. It is not seldom*  
39 *that we push really hard to get through the program. As we realize we are*  
40 *not making it, you feel how stress is building up also in the operating room.*  
41  
42  
43  
44  
45 *(Doctor A)*  
46  
47

### 48 **Quality of patient care as the basis for professional fulfillment**

49

50  
51 The participants expressed that quality of patient care was foundational for their experience  
52 of professional fulfillment. Some of the doctors emphasized how the two were mutually  
53 reinforcing.  
54  
55  
56  
57  
58  
59  
60

1  
2  
3 *Vital for job satisfaction is that we have an experience that things go well*  
4  
5 *with our patients. (Doctor A)*  
6  
7

8  
9 The importance of continuity between the individual patient and the individual physician  
10 was also brought up as a central aspect of providing good care.  
11  
12

13  
14 *What gives me satisfaction is when I greet my patients, operate on them*  
15 *and follow up afterwards, so the patient is satisfied. That is all I wish for.*  
16  
17  
18  
19 *(Doctor B)*  
20  
21

22 Satisfied patients gave doctors a sense of accomplishment. A consequence was that a  
23 mistake made by a doctor that affected a patient discomposed the individual doctor.  
24  
25

26  
27  
28 *A downside of being a surgeon are complications, it sort of comes with the*  
29 *job. I had a severe surgical complication last week and this is darkening*  
30 *everything, it affected me fundamentally for many days. (Doctor G)*  
31  
32  
33  
34  
35

36 ***Management not recognizing quality of care challenges and providing limited support for***  
37 ***doctor initiatives***  
38  
39

40  
41 The interviewed doctors experienced how the managerial focus on increasing volume  
42 conveyed an implicit assumption that more output, of the same quality, could be created by  
43 simply increasing the speed. This way of communicating about how to increase surgical  
44 volume created a strong dissonance with the everyday challenges experienced in the clinic.  
45  
46  
47  
48  
49  
50

51  
52 *Everyone expects that treatments are first class. We only measure waiting*  
53 *times and how soon we have written the discharge summary, and similar*  
54 *unimportant things. Everybody expects treatments to be the same and*  
55 *quality to be the same, no matter what. That is not true! (Doctor F)*  
56  
57  
58  
59  
60

1  
2  
3 A number of different individual initiatives to improve quality and facilitate every day work  
4  
5 had been initiated. One doctor described saving time and increasing quality and safety by  
6  
7 making standard patient record templates for different operational procedures. Another  
8  
9 doctor worked to schedule ward rounds to make them visible, instead of being something  
10  
11 that the doctors were supposed to “squeeze in” between other scheduled tasks.  
12  
13

14  
15  
16 *We are measured on the number of operations we perform and on the*  
17  
18 *number of patients we see in the outpatient clinic. But we are not*  
19  
20 *measured on the time we spend on ward rounds. Talking with the doctor is*  
21  
22 *a major part of what patients appreciate when measuring patient*  
23  
24 *satisfaction. Now, ward rounds are scheduled. (Doctor G)*  
25  
26  
27

28  
29 The participants expressed a sense of disappointment, and surprise, that the organization  
30  
31 neither seemed to appreciate the individual initiatives, nor provide a structure to go from  
32  
33 the individual benefit towards benefitting the group of doctors. While many of the doctors  
34  
35 had limited or no suggestions about what management ought to do differently, some  
36  
37 suggested that the traditional hierarchical way of managing needs to be modernized.  
38  
39

40  
41  
42 *I think this is about hospital management still struggling to find a more*  
43  
44 *modern form. I find that teamwork is something that private enterprises*  
45  
46 *have focused on for a long time. But the old way of leading is still what*  
47  
48 *goes on in hospitals. With traditional hierarchies and top-down decisions.*  
49  
50  
51 *(Doctor A)*  
52  
53

54  
55 Several doctors experienced that management did not do enough to facilitate for doctors to  
56  
57 participate in clinical development work. There were also some who clearly articulated the  
58  
59  
60

1  
2  
3 need for a major overhaul of the existing hospital culture, towards a situation where  
4  
5 involvement from different employee groups was considered the norm.  
6  
7

8  
9 *If you are working with changes in such a fine-tuned and complex*  
10  
11 *environment as a hospital, one must involve those affected by a change.*  
12  
13 *You put small groups of surgeons and op-nurses together. Provide them*  
14  
15 *some time to work on specific issues. Listen attentively to what they say*  
16  
17 *about key pressure points and act accordingly. Not simply pushing*  
18  
19 *decisions down at people! (Doctor A)*  
20  
21  
22  
23  
24  
25  
26  
27

## 28 **Discussion**

29  
30 This study explores how doctors experience the interactions among professional fulfillment,  
31  
32 organizational factors and quality of patient care.  
33  
34

35  
36 The participants described how providing quality of patient care was the single most  
37  
38 important dimension contributing to their professional fulfillment. The interactions among  
39  
40 professional fulfillment, organizational factors and quality of patient care were often  
41  
42 experienced as resulting in complex and challenging situations. A doctor could be scheduled  
43  
44 to operate while also having to run to the ward to check on patients, or run late to pick up  
45  
46 children from daycare because shift times between operations ran longer than planned. The  
47  
48 interviewed doctors primarily handled this tension individually by "stretching themselves",  
49  
50 and working around organizational hindrances in order to, no matter what, provide quality  
51  
52 of patient care.  
53  
54  
55  
56  
57  
58  
59  
60

1  
2  
3 Quality of patient care is a key outcome for any healthcare organization. One might consider  
4 that statement as self-evident. In particular when working as a doctor in a hospital that is  
5 part of the societal infrastructure in Norway, a well-functioning and affluent Nordic country.  
6  
7  
8 On the other hand it might be prudent to remind ourselves that the amount of money  
9  
10 available to spend on healthcare is limited. This restriction might be even clearer in a tax-  
11  
12 financed healthcare system, like the Norwegian. There is thus a built-in tension that requires  
13  
14 a constant balancing of clinical needs with budgetary means.  
15  
16  
17  
18  
19

20  
21 The participants expressed how conversations about **quality of care were crowded out by**  
22  
23 **production numbers and economic data.** They conveyed that the essence of being a  
24  
25 professionally fulfilled doctor, creating high quality care for patients, no longer receives  
26  
27 sufficient recognition.  
28  
29

30  
31 This finding is in line with research pointing to changes in what society, patients and  
32  
33 employers are expecting from a doctor, and how this is starting to create a job situation that  
34  
35 is no longer what doctors expect<sup>50</sup>. The research suggests that clinical leaders have a crucial  
36  
37 role in supporting doctors to find meaning in a changing professional role<sup>10 51 52</sup>. The  
38  
39 inherent tension between an organizational focus on the bottom line and doctors' focus on  
40  
41 quality of patient care is found to increase the risk for experiencing meaninglessness,  
42  
43 especially in combination with a lack of managerial recognition for work well done<sup>53</sup>.  
44  
45  
46  
47

48 According to this research, the interviewed doctors express an unfortunate combination of  
49  
50 factors that are found to contribute to a sense of meaninglessness.  
51  
52

53  
54 Faced with an accelerating struggle against time, the participants described "**stretching**  
55  
56 **themselves" to deliver quality care despite organizational shortcomings.** The experience of  
57  
58 doctors having less time and more work is aligned with other studies<sup>25 54-56</sup>. However, in this  
59  
60

1  
2  
3 study, the participants describe how finding individual workarounds in order to handle  
4  
5 organizational shortcomings, no longer is experienced as sustainable. Our participants relate  
6  
7 how they have started to consider that quality of patient care, and their own wellbeing,  
8  
9 both could suffer from this way of overextending themselves.  
10  
11

12  
13 While limited time with patients was the primary concern, work–home balance was also an  
14  
15 issue that troubled many of the participants. This is in line with recent studies in Sweden  
16  
17 and Norway, where young doctors point to the importance of finding a job with good work-  
18  
19 home balance<sup>57 58</sup>. This view resonates with “downshifting”, a societal change defined by  
20  
21 some researchers as an endorsement of the question, “In the last ten years, have you  
22  
23 voluntarily made a long-term change in your lifestyle, other than planned retirement, which  
24  
25 has resulted in you earning less money?”. More time with family was the most important  
26  
27 reason for downshifting, followed by the desire to gain more control and personal  
28  
29 fulfillment<sup>59</sup>.  
30  
31  
32  
33  
34  
35

36 ***That quality of patient care is foundational for professional fulfillment*** has been found in  
37  
38 many previous studies<sup>55 60 61 62</sup>. While the professional identity of doctors has long hinged  
39  
40 on delivering good quality of patient care, more recently, the lack of physician well-being  
41  
42 has been recognized as a potential threat to quality care<sup>3</sup>. Research indicating a relationship  
43  
44 between strain and stress in doctors and negative impact on quality and safety of patient  
45  
46 care<sup>12 14 15</sup>, has also lead to an amendment of the Declaration of Geneva, as adopted by the  
47  
48 World Medical Association in 2017: “I will attend to my own health, well-being and abilities  
49  
50 in order to provide care of the highest standard”<sup>63</sup>.  
51  
52  
53  
54  
55  
56  
57  
58  
59  
60

1  
2  
3 The study participants experienced a hierarchical management culture and that  
4  
5 management did ***not recognize quality of care challenges and provided limited support for***  
6  
7  
8 ***doctor initiatives.***  
9

10  
11 The respondents expressed frustrations with the limited possibility to participate in  
12  
13 developing organizational policies, processes and systems. At the same time there were few  
14  
15 accounts of actual aspirations or doctors actively working to find solutions to organizational  
16  
17 shortcomings. These findings are aligned with other research reporting that doctors'  
18  
19 engagement in development work has been a challenge<sup>27 64 65</sup>. However, doctors who did  
20  
21 engage had positive experiences from similar improvement initiatives and had experienced  
22  
23 that also this type of work task contributed to their sense of professional fulfilment<sup>18 26 66</sup>  
24  
25

26  
27 To involve doctors in development work, recognizing their ideas and listening to understand  
28  
29 what the difficulties are, has been suggested as a central dimension to reduce burnout<sup>25 67</sup>.  
30  
31

32  
33 A deliberate, collaborative process where managers commit scheduled doctor-time for this  
34  
35 type of work is key. What a manager says in conversations with the doctors, and what a  
36  
37 manager does really matters in relation to how clinicians participate in developing clinical  
38  
39 policies, processes and systems<sup>68-70</sup>. In order to support this process, organizational leaders  
40  
41 in healthcare need to be attuned to how psychological and social needs relate to doctors  
42  
43 motivation and engagement<sup>71 70 72</sup>. In a participatory change study, where doctors analyzed  
44  
45 work-related problems, created local solutions which were then implemented, working  
46  
47 conditions and patients' perceived quality of care both showed positive changes<sup>24</sup>. Another  
48  
49 study showed that doctors who were actively involved in the process of changing the local  
50  
51 ward round experienced better-informed clinical decisions, had fewer follow-up questions  
52  
53 from their patients and increased their own professional fulfillment<sup>73</sup>.  
54  
55  
56  
57  
58  
59  
60

### ***Strengths and Weaknesses of this study***

This study included a feedback session where the researchers presented findings from analyzing the interviews to the full group of doctors working at the surgical department.

Both those who participated in interviews and several doctors who had not been interviewed, confirmed the researchers understanding of the local work situation. This is a study strength that substantiates the findings. It confirms, in line with Malterud <sup>46</sup>, that a limited number of information rich interviews can contribute with new meaningful knowledge.

Having an interdisciplinary research group with complimentary educational, research and work related experiences analyzing the interviews contributed to a multifaceted and nuanced understanding of the empirical information.

In this study we examine doctors' perceptions about their work situation, without observing their actual behaviour. A potential weakness concerns if the interviewed doctors described their actual reality. Previous research has found that what people present in interviews reflect their perceptions, and these perceptions also inform their actions<sup>43 74</sup>. By asking for clinical examples we also strove to ensure close proximity to the local situation.

While this study focused on a single surgical setting, we suggest that other health care settings can learn from this study. We base this notion of transferability on research showing communality among doctors across different contexts<sup>75</sup>, by some researchers called one occupational community of practice <sup>76</sup>.



## Conclusions

The interviewed doctors describe their struggle to balance the inherent tension among professional fulfillment, organizational factors and quality of patient care in their everyday work. They communicate how “stretching themselves”, to overcome organizational shortcomings, is no longer a feasible strategy without compromising both professional fulfillment and quality of patient care. Managers need to ensure that doctors are involved when developing organizational policies, processes and systems. By including doctors, the lived experience of the inherent tension among professional fulfillment, organizational factors and quality of patient care is used in a meaningful way to improve organizational factors. This is likely to be beneficial for both professional fulfillment and quality of patient care.

## Practice Implications

Healthcare management has a central role, and is responsible for, ensuring time and planned forums for doctors to engage and contribute in meaningful change. Engaging doctors in development work, also challenges historical management practices, as this requires organizational leaders to consider how psychological and social needs contributes to individual doctor engagement and well-being.

## Future research

This study has provided knowledge based on interviews with Norwegian doctors. It points to a need for future research to explore how the managerial side understands the interactions among professional fulfillment, organizational factors and quality of patient care.

1  
2  
3 Participatory interactive studies show positive effects from collecting doctors' experiences,  
4  
5 analyzing the empirical material and feeding it back in a consolidated and actionable form.  
6  
7

8 This external and structured view helps doctors and managers identify areas for local  
9  
10 organizational change and facilitates the active involvement of doctors in the change  
11  
12 process. There is a need for more research with participatory interactive methodologies.  
13  
14  
15

### 16 **Contributorship**

17  
18  
19 All four authors (FB, JR, BB, KIR) meet the conditions outlined in the ICMJE  
20  
21 recommendations and have all contributed in all dimensions.  
22  
23  
24

- 25 • Substantial contributions to the conception or design of the work, or the acquisition,  
26  
27 analysis or interpretation of data.
- 28 • Drafting the work or revising it critically for important intellectual content.
- 29 • Final approval of the version published.

30  
31  
32 Agreement to be accountable for all aspects of the work in ensuring that questions related  
33  
34 to the accuracy or integrity of any part of the work are appropriately investigated and  
35  
36 resolved. There is no one who fulfills the criteria that has been excluded as an author.  
37  
38  
39  
40  
41  
42  
43  
44

### 45 **Role of the Funding Source**

46  
47  
48 This work was supported by Den norske legeforenings fond for kvalitetsforbedring og  
49  
50 pasientsikkerhet (Norwegian Fund for Quality Improvements and Patient Safety) grant  
51  
52 number 16 / 5234. We confirm researcher independence from the funders and that all  
53  
54 authors had full access to all data in the study and can take responsibility for the integrity of  
55  
56 the data, the accuracy of the data analysis, results and conclusions.  
57  
58  
59  
60

### **Conflicts of Interest**

No competing interests exist for any of the researchers involved in this article.

### **Transparency declaration**

The lead author affirms that this manuscript is an honest, accurate, and transparent account of the study being reported; that no important aspects of the study have been omitted; and that any discrepancies from the study as planned have been explained.

### **Data sharing Statement**

Interview transcript are the empirical source. These are only for the assigned research group in order to honor the commitment with the participants.

## References

1. Berwick D. Crossing the boundary: changing mental models in the service of improvement. *Int J Qual Health Care* 1998;**10**(5):435-41.
2. Sikka R, Morath JM, Leape L. The Quadruple Aim: care, health, cost and meaning in work. *BMJ Qual Saf* 2015:bmjqs-2015-004160.
3. West CP. Physician Well-Being: Expanding the Triple Aim. *J Gen Intern Med* 2016:1-2.
4. Trockel M, Bohman B, Lesure E, et al. A Brief Instrument to Assess Both Burnout and Professional Fulfillment in Physicians: Reliability and Validity, Including Correlation with Self-Reported Medical Errors, in a Sample of Resident and Practicing Physicians. *Acad Psychiatry* 2018;**42**(1):11-24.
5. Bodenheimer T, Sinsky C. From Triple to Quadruple Aim: Care of the Patient Requires Care of the Provider. *Ann Fam Med* 2014;**12**(6):573-76.
6. Hussey PS, Wertheimer S, Mehrotra A. The association between health care quality and cost: a systematic review. *Ann Intern Med* 2013;**158**(1):27-34.
7. Leatt P, Baker GR, Halverson PK, et al. Downsizing, reengineering, and restructuring: long-term implications for healthcare organizations. *Front Health Serv Manage* 1997;**13**(4):3.
8. Bourbonnais R, Brisson C, Malenfant R, et al. Health care restructuring, work environment, and health of nurses. *Am J Ind Med* 2005;**47**(1):54-64.
9. Nordang K, Hall-Lord M-L, Farup PG. Burnout in health-care professionals during reorganizations and downsizing. A cohort study in nurses. *BMC Nurs* 2010;**9**(1):8.
10. McKinlay JB, Marceau L. New Wine in an Old Bottle: Does Alienation Provide an Explanation of the Origins of Physician Discontent? *Int J Health Serv* 2011;**41**(2):301-35.
11. Firth-Cozens J, Greenhalgh J. Doctors' perceptions of the links between stress and lowered clinical care. *Soc Sci Med* 1997;**44**(7):1017-22.
12. West CP, Tan AD, Habermann TM, et al. Association of resident fatigue and distress with perceived medical errors. *JAMA* 2009;**302**(12):1294-300.
13. Shanafelt TD, Bradley KA, Wipf JE, et al. Burnout and self-reported patient care in an internal medicine residency program. *Ann Intern Med* 2002;**136**(5):358-67.
14. Angerer P, Weigl M. Physicians' Psychosocial Work Conditions and Quality of Care: A Literature Review. *Professions and Professionalism* 2015;**5**(1).
15. Scheepers RA, Boerebach BCM, Arah OA, et al. A Systematic Review of the Impact of Physicians' Occupational Well-Being on the Quality of Patient Care. *Int J Behav Med* 2015;**22**(6):683-98.
16. Le Grand J. *Motivation, agency, and public policy: of knights and knaves, pawns and queens*: Oxford University Press on Demand, 2003.
17. Eijkenaar F, Emmert M, Scheppach M, et al. Effects of pay for performance in health care: a systematic review of systematic reviews. *Health Policy* 2013;**110**(2):115-30.
18. Lindgren Å, Bååthe F, Dellve L. Why risk professional fulfilment: a grounded theory of physician engagement in healthcare development. *Int J Health Plann Manage* 2013;**28**(2):e138-e57.
19. Khullar D, Chokshi DA, Kocher R, et al. Behavioral economics and physician compensation—promise and challenges. *N Engl J Med* 2015;**372**(24):2281-83.
20. Knorring Mv, Dept of Clinical N, Inst för klinisk n, et al. The manager role in relation to the medical profession, 2012.
21. Shanafelt TD, Gorringer G, Menaker R, et al. Impact of organizational leadership on physician burnout and satisfaction. *Mayo Clin Proc* 2015;**90**(4):432-40.
22. von Knorring M, Alexanderson K, Eliasson MA. Healthcare managers' construction of the manager role in relation to the medical profession. *J Health Organ Manag* 2016;**30**(3):421-40.
23. Baathe F, Norback LE. Engaging physicians in organisational improvement work. *J Health Organ Manag* 2013;**27**(4):479-97.

- 1
  - 2
  - 3
  - 4
  - 5
  - 6
  - 7
  - 8
  - 9
  - 10
  - 11
  - 12
  - 13
  - 14
  - 15
  - 16
  - 17
  - 18
  - 19
  - 20
  - 21
  - 22
  - 23
  - 24
  - 25
  - 26
  - 27
  - 28
  - 29
  - 30
  - 31
  - 32
  - 33
  - 34
  - 35
  - 36
  - 37
  - 38
  - 39
  - 40
  - 41
  - 42
  - 43
  - 44
  - 45
  - 46
  - 47
  - 48
  - 49
  - 50
  - 51
  - 52
  - 53
  - 54
  - 55
  - 56
  - 57
  - 58
  - 59
  - 60
24. Weigl M, Hornung S, Angerer P, et al. The effects of improving hospital physicians working conditions on patient care: a prospective, controlled intervention study. *BMC Health Serv Res* 2013;**13**(1):1.
25. Shanafelt TD, Noseworthy JH. Executive Leadership and Physician Well-being: Nine Organizational Strategies to Promote Engagement and Reduce Burnout. *Mayo Clin Proc* 2017;**92**(1):129-46.
26. Dickson G. Anchoring physician engagement in vision and values: principles and framework. Saskatchewan: Regina Qu'Appelle Health Region 2012.
27. Berwick DM, Nolan TW. Physicians as leaders in improving health care: a new series in *Annals of Internal Medicine*. *Ann Intern Med* 1998;**128**(4):289-92.
28. Kaissi A. Enhancing Physician Engagement: An International Perspective. *Int J Health Serv* 2014;**44**(3):567-92.
29. Bååthe F. Physicians' engagement: qualitative studies exploring physicians' experiences of engaging in improving clinical services and processes [Doctoral thesis,]. Sahlgrenska Academy at the University of Gothenburg, 2015.
30. Dyrbye LN, Trockel M, Frank E, et al. Development of a research agenda to identify evidence-based strategies to improve physician wellness and reduce burnout. *Ann Intern Med* 2017;**166**(10):743-44.
31. Sinsky CA, Willard-Grace R, Schutzbank AM, et al. In search of joy in practice: a report of 23 high-functioning primary care practices. *Ann Fam Med* 2013;**11**(3):272-78.
32. Bringedal B, B C. Styring for kvalitet og likebehandling. Norske legers syn på styringsinstrumentenes betydning. (Governance for quality and equity. Norwegian physicians' views on the effects of steering instruments.). In: Aasen B, et al., ed. *Prioritering, styring og likebehandling Utfordringer i norsk helsetjeneste*. Oslo: Cappelen Akademiske, 2018.
33. [The Health Services Campaign] Helsetjenesteaksjonen 2015 . . <http://helsetjenesteaksjonen.no/> (20.12.2018).
34. Nylenna M, Aasland O. Jobbtilfredshet blant norske leger [Job satisfaction among Norwegian doctors]. *Tidsskrift for Den norske legeforening* 2010;**130**(10):1028-31.
35. Casalino LP, Crosson FJ. Physician Satisfaction and Physician Well-Being: Should Anyone Care? 2015 2015;**5**(1).
36. Aasland OG, Rosta J, Nylenna M. Healthcare reforms and job satisfaction among doctors in Norway. *Scandinavian journal of public health* 2010;**38**(3):253-58.
37. Hertzberg TK, Skirbekk H, Tyssen R, et al. The hospital doctor of today-still continuously on duty. *Tidsskr Nor Legeforen* 2016; **136**: 1635-38.
38. Aasland O, Rosta J. Hvordan har overlegene det? [The hospital consultant - how are they?] (In Norwegian). *Overlegen* 2011;**1**:47-55.
39. West CP, Dyrbye LN, Shanafelt TD. Physician burnout: contributors, consequences and solutions. *J Intern Med* 2018.
40. Patton MQ. *Qualitative research & evaluation methods*. London: SAGE, 2002.
41. Greenhalgh T, Robert G, Macfarlane F, et al. Diffusion of Innovations in Service Organizations: Systematic Review and Recommendations. *Milbank Q* 2004;**82**(4):581-629.
42. Ellström PE, Rönnqvist D, Thunborg C. *Omvärld, verksamhet och förändrade kompetenskrav inom hälso- och sjukvården: en studie av föreställningar hos centrala aktörer inom ett landsting*: Linköpings universitet. Institutionen för pedagogik och psykologi, 1994.
43. Kvale S, Brinkmann S. *Den kvalitativa forskningsintervjun (The Qualitative Research Interview)*. Lund: Studentlitteratur, 2009.
44. Cooperrider D. The gift of new eyes: Personal reflections after 30 years of appreciative inquiry in organizational life. *Research in organizational change and development* 2017:81.
45. Miles MB, Huberman AM, Saldaña J. *Qualitative data analysis: A methods sourcebook*: SAGE Publications, Incorporated, 2013.

- 1
- 2
- 3
- 4 46. Malterud K, Siersma VD, Guassora AD. Sample Size in Qualitative Interview Studies Guided by
- 5 Information Power. *Qual Health Res.* 2016;**26**(13):1753-1760 Epub 2016 Jul 10.
- 6 47. Miles MB, Huberman AM. *Qualitative data analysis : an expanded sourcebook.* Thousand Oaks,
- 7 CA: Sage, 1994.
- 8 48. World Medical Association. World medical association declaration of helsinki: Ethical principles
- 9 for medical research involving human subjects. *JAMA* 2013;**310**(20):2191-94.
- 10 49. Helse- og omsorgsdepartementet. Lov om medisinsk og helsefaglig forskning
- 11 (Helseforskningsloven=The Norwegian Health Research Act)
- 12 <https://lovdata.no/dokument/NL/lov/2008-06-20-44>. LOV-2008-06-20-44.
- 13 50. Edwards N, Kornacki MJ, Silversin J. Unhappy doctors: what are the causes and what can be
- 14 done? *BMJ* 2002;**324**(7341):835-38.
- 15 51. Royal College of Physicians. Doctors in society: medical professionalism in a changing world.
- 16 Report of a Working Party of the Royal College of Physicians of London. London: RCP, 2005,
- 17 2005.
- 18 52. Cruess RL, Cruess SR, Boudreau JD, et al. A Schematic Representation of the Professional Identity
- 19 Formation and Socialization of Medical Students and Residents: A Guide for Medical
- 20 Educators. *Acad Med* 2015:1.
- 21 53. Bailey C, Madden A. What Makes Work Meaningful -- Or Meaningless. *MIT Sloan Management*
- 22 *Review* 2016;**57**(4):53-61.
- 23 54. Dyrbye LN, Shanafelt TD, Sinsky CA, et al. Burnout among health care professionals: A call to
- 24 explore and address this underrecognized threat to safe, high-quality care. *NAM (National*
- 25 *Academy of Medicine) Perspective* 2017.
- 26 55. Friedberg MW, Chen PG, Van Busum KR, et al. *Factors affecting physician professional*
- 27 *satisfaction and their implications for patient care, health systems, and health policy:* RAND
- 28 corporation, 2013.
- 29 56. Wallace J, Lemaire J, Ghali W. Physician wellness: a missing quality indicator. *The Lancet*
- 30 2009;**374**(9702):1714-21.
- 31 57. Diderichsen S. It's just a job: a new generation of physicians dealing with career and work ideals.
- 32 Umeå universitet, 2017.
- 33 58. Hertzberg TK, Isaksson Rø K, Vaglum P, et al. Work-home interface stress: an important predictor
- 34 of emotional exhaustion 15 years into a medical career. *Ind Health* 2016;**54**(2):139-48.
- 35 59. Hamilton C. Downshifting in Britain. A sea-change in the pursuit of happiness 2003;**2**.
- 36 60. Bovier PA, Perneger TV. Predictors of work satisfaction among physicians. *Eur J Public Health*
- 37 2003;**13**(4):299-305.
- 38 61. West CP, Huschka MM, Novotny PJ, et al. Association of perceived medical errors with resident
- 39 distress and empathy: A prospective longitudinal study. *JAMA* 2006;**296**(9):1071-78.
- 40 62. Bliss M. *William Osler: a life in medicine.* New York: Oxford University Press, 1999.
- 41 63. Parsa-Parsi R. The revised declaration of geneva: A modern-day physician's pledge. *JAMA*
- 42 2017;**318**(20):1971-72.
- 43 64. Bååthe F, Erik Norbäck L. Engaging physicians in organisational improvement work. *J Health*
- 44 *Organ Manag* 2013;**27**(4):479-97.
- 45 65. Lee TH, Cosgrove T. Engaging doctors in the health care revolution. United States: Harvard
- 46 Business School Publ. Corp, 2014:104-11.
- 47 66. Davies H, Powell A, Rushmer R. Why don't clinicians engage with quality improvement? *J Health*
- 48 *Serv Res Policy* 2007;**12**(3):129-30.
- 49 67. Swensen S, Kabcenell A. Physician-Organization Collaboration Reduces Physician Burnout and
- 50 Promotes Engagement: The Mayo Clinic Experience. *J Healthc Manag* 2016;**61**(2):105-27
- 51 68. Stacey R. *The Tools and Techniques of Leadership and Management: Meeting the challenge of*
- 52 *complexity.* London: Routledge, 2012.
- 53
- 54
- 55
- 56
- 57
- 58
- 59
- 60

- 1  
2  
3 69. Stacey RD, Mowles C. *Strategic management and organisational dynamics: the challenge of*  
4 *complexity to ways of thinking about organisations*. Harlow, United Kingdom: Pearson  
5 Education, 2016.  
6  
7 70. Swensen SJ, Shanafelt T. An Organizational Framework to Reduce Professional Burnout and Bring  
8 Back Joy in Practice. *Joint Commission journal on quality and patient safety* 2017;**43**(6):308-  
9 13.  
10 71. Herzberg F. One more time: How do you motivate employees: Harvard Business Review Boston,  
11 MA, 1968.  
12 72. Ryan RM, Deci EL. Self-Determination Theory and the Facilitation of Intrinsic Motivation, Social  
13 Development, and Well-Being. *Am Psychol* 2000;**55**(1):68-78.  
14 73. Baathe F, Ahlborg Jr G, Lagström A, et al. Physician experiences of patient-centered and team-  
15 based ward rounding—an interview based case-study. *J Hosp Adm* 2014;**3**(6):p127.  
16 74. Czarniawska B. *Narratives in social science research*. London: SAGE, 2004.  
17 75. Van Maanen J, Barley SR. Occupational communities: culture and control in organizations. *Res*  
18 *Organ Behav*, 1984:287-365.  
19 76. Wenger E. Communities of Practice and Social Learning Systems. *Organization* 2000;**7**(2):225-46.  
20  
21  
22  
23  
24  
25  
26  
27  
28  
29  
30  
31  
32  
33  
34  
35  
36  
37  
38  
39  
40  
41  
42  
43  
44  
45  
46  
47  
48  
49  
50  
51  
52  
53  
54  
55  
56  
57  
58  
59  
60

1  
2  
3  
4  
5  
6  
7  
8  
9  
10  
11  
12  
13  
14  
15  
16  
17  
18  
19  
20  
21  
22  
23  
24  
25  
26  
27  
28  
29  
30  
31  
32  
33  
34  
35  
36  
37  
38  
39  
40  
41  
42  
43  
44  
45  
46  
47  
48  
49  
50  
51  
52  
53  
54  
55  
56  
57  
58  
59  
60



Figure 1. Conceptual model used in the interview situation

338x190mm (96 x 96 DPI)



## Interview guide:

- Describe your role as physician here at the hospital
  - Position, seniority (consultant, resident, intern), specialty/sub-specialty, researcher
- Describe a day when you go home happy/satisfied/content with your workday
  - Describe another day when you go home and are not happy/satisfied/content
    - What are your thoughts about what it is that makes the difference?
- What are your experiences from the interactions between physician's professional fulfillment/satisfaction, organizational factors and quality of patient care?
  - Are there any challenges where you work today in relation to these interactions?
    - Examples from own individual experiences preferred
    - From your own experiences and reflections – what are perspectives that would benefit from being improved?
      - How does this relate to your own professional fulfillment/satisfaction?
      - How does this relate to quality of patient care?
      - Is it measured per today? How would you go about to measure this?
- Which of the targets and measurements that your department follow are you aware of?
  - Are any of these really important for you/ that you actively track and follow?
  - Are there other measurements you would appreciate to follow?
- Do you experience that the organization is supportive and facilitates for you to come up with suggestions for improvements?
  - When was the last time you had an idea/suggestion for improvement? (concrete example)
    - How did you go about to get support and initiate change based upon your idea/suggestion?
    - Has your idea/suggestion become reality?
  - From your own experience, what can be done, if anything, to further facilitate for new ideas to improve clinical practice?
- If you were the Head of the Department or Hospital Director are there things you would really want to pay additional attention to?
- Are there other questions you would have wanted us to ask, in relation to this research area?

**Much appreciate your time and effort in participating!**



**LEFO**

Institute for Studies of  
the Medical Profession

## Standards for reporting Qualitative Research (SRQR \*)

| No.                       | Topic                                                                                        | Item found at page     |
|---------------------------|----------------------------------------------------------------------------------------------|------------------------|
| <b>Title and Abstract</b> |                                                                                              |                        |
| S1                        | Title                                                                                        | 1                      |
| S2                        | Abstract                                                                                     | 1                      |
| <b>Introduction</b>       |                                                                                              |                        |
| S3                        | Problem formulation                                                                          | 2                      |
| S4                        | Purpose or research question                                                                 | 3                      |
| <b>Methods</b>            |                                                                                              |                        |
| S5                        | Qualitative approach and research paradigm                                                   | 3                      |
| S6                        | Researcher characteristics and reflexivity                                                   | 5                      |
| S7                        | Context                                                                                      | 4                      |
| S8                        | Sampling strategy                                                                            | 5                      |
| S9                        | Ethical issues pertaining to human subjects                                                  | 5                      |
| S10                       | Data collection methods                                                                      | 5                      |
| S11                       | Data collection instruments and technologies                                                 | 5                      |
| S12                       | Units of study                                                                               | 5                      |
| S13                       | Data processing                                                                              | 5                      |
| S14                       | Data analysis                                                                                | 5                      |
| S15                       | Technique to enhance trustworthiness                                                         | 3, 5, 11               |
| <b>Results/Findings</b>   |                                                                                              |                        |
| S16                       | Synthesis and interpretation                                                                 | 6,7,8,9,10             |
| S17                       | Links to empirical data                                                                      | 6,7,8,9,10             |
| <b>Discussion</b>         |                                                                                              |                        |
| S18                       | Integration with prior work, implications, transferability, and contribution(s) to the field | 11, 12, 13, 14, 15, 16 |
| S19                       | Limitations                                                                                  | 10                     |
| <b>Other</b>              |                                                                                              |                        |
| S20                       | Conflicts of interest                                                                        | 17                     |
| S21                       | Funding                                                                                      | 17                     |

\* **Standards for Reporting Qualitative Research: A Synthesis of Recommendations.**

O'Brien, Bridget; Harris, Ilene; Beckman, Thomas; Reed, Darcy; MD, MPH; Cook, David; MD, MHP

Academic Medicine. 89(9):1245-1251, September 2014.

DOI: 10.1097/ACM.0000000000000388

1  
2  
3  
4  
5  
6  
7  
8  
9  
10  
11  
12  
13  
14  
15  
16  
17  
18  
19  
20  
21  
22  
23  
24  
25  
26  
27  
28  
29  
30  
31  
32  
33  
34  
35  
36  
37  
38  
39  
40  
41  
42  
43  
44  
45  
46  
47  
48  
49  
50  
51  
52  
53  
54  
55  
56  
57  
58  
59  
60

For peer review only

'E
